# Supplementary material for: Sc(OTf)3 catalyzed [3 + 2]-annulation reaction of donor–acceptor aziridines with methylene exo-glycals: synthesis of chiral carbohydrate-spiro-heterocycles
Source: Royal Society of Chemistry journal article supplement (doi:10.1039/d1qo00228g), 2021-01-01

## *Supporting Information*

### **Sc(OTf)<sub>3</sub> Catalyzed [3 + 2]-Annulation Reaction of Donor– Acceptor Aziridines with Methylene *exo*-Glycals: Synthesis of Chiral Carbohydrate-spiro-heterocycles**

**Jie-Hui Zhang, Cheng-Lin Pan, Huan-Huan Zhang, Peng-Fei Xu\* and Yong-Chun Luo\***

*State Key Laboratory of Applied Organic Chemistry, College of Chemistry and Chemical Engineering, Lanzhou*

*University, Lanzhou 730000, P. R. China*

*luoych@lzu.edu.cn*

#### **Table of contents**

|                                                                                                                                                             |    |
|-------------------------------------------------------------------------------------------------------------------------------------------------------------|----|
| 1. General information .....                                                                                                                                | 2  |
| 2. Procedure for the Sc(OTf) <sub>3</sub> catalyzed [3 + 2]-annulation reaction of aziridine <b>1</b> with <i>exo</i> -glycal <b>2a</b> and <b>2c</b> ..... | 2  |
| 3. General procedure for the Sc(OTf) <sub>3</sub> catalyzed [3 + 2]-annulation reaction of aziridine <b>1</b> with <i>exo</i> -glycal <b>2b</b> .....       | 3  |
| 4. Procedure for the gram-scale reaction of aziridine <b>11</b> with <i>exo</i> -glycal <b>2a</b> .....                                                     | 4  |
| 5. Procedure for the detosylation of the annulation product (8 <i>S</i> )- <b>3aa</b> <sup>4</sup> .....                                                    | 4  |
| 6. Procedure for the hydrolysis of annulation product (8 <i>R</i> )- <b>3la</b> <sup>5</sup> .....                                                          | 5  |
| 7. Characterization data of Products .....                                                                                                                  | 6  |
| 8. X-ray crystallographic data .....                                                                                                                        | 27 |
| 9. <sup>1</sup> H-NMR, <sup>13</sup> C-NMR and <sup>19</sup> F NMR spectra of the compounds.....                                                            | 33 |

## 1. General information

Chemicals and solvents were either purchased from commercial suppliers or purified by standard techniques. Analytical thin-layer chromatography (TLC) was performed on silica gel plates with F-254 indicator and compounds were visualized by irradiation with UV light. Flash chromatography was carried out utilizing silica gel 200-300 mesh. The  $^1\text{H}$  NMR spectra was recorded on 400 MHz spectrometers, and the  $^{13}\text{C}$  NMR was recorded on 100 MHz spectrometer. The spectra were recorded in  $\text{CDCl}_3$  at room temperature.  $^1\text{H}$  and  $^{13}\text{C}$  NMR chemical shifts are reported in ppm relative to either the residual solvent peak ( $^{13}\text{C}$ ) ( $\delta = 77.00$  ppm) or TMS ( $^1\text{H}$ ) ( $\delta = 0$  ppm) as an internal standard. Data for  $^1\text{H}$  NMR are reported as follows: chemical shift ( $\delta$  ppm), multiplicity (s = singlet, d = doublet, t = triplet, q = quartet, dd = double of doublet, td = triplet of doublet, m = multiplet), integration, coupling constant (Hz) and assignment. HRMS were performed on FT-ICRMS mass instrument (ESI). Optical rotation was measured on the Perkin Elmer 341 polarimeter with  $[\alpha]_{\text{D}}$  values reported in degrees. Concentration (c) is in g/100 mL.

## 2. Procedure for the $\text{Sc}(\text{OTf})_3$ catalyzed [3 + 2]-annulation reaction of aziridine 1

with *exo*-glycal 2a and 2c

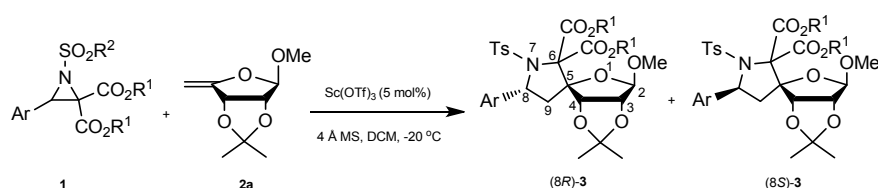

Under an atmosphere of dry nitrogen, activated 4 Å molecular sieves (100 mg), aziridine **1**<sup>1</sup> (0.20 mmol, 1.0 equiv), *exo*-glycal **2**<sup>2</sup> (0.24 mmol, 1.2 equiv) and 2mL of

(1) (a) X. X. Wu, L. Li, J. L. Zhang. *Adv. Synth. Catal.*, 2012, **354**, 3485. (b) B. Wang, M. Liang, J. Tang, Y. T. Deng, J. H. Zhao, H. Sun, C. H. Tung, Jiong. Jia, and Z. H. Xu, *Org. Lett.* 2016, **18**, 4614-4617. (c) Y. T. Liao, X. H. Liu, Y. Zhang, Y. L. Xu, Y. Xia, L. L. Lin, and X. M. Feng, *Chem. Sci.*, 2016, **7**, 3775-3779.

(2) (a) W. M. Li, Y. H. Niu, D. C. Xiong, X. P. Cao, and X. S. Ye, *J. Med. Chem.* 2015, **58**,

anhydrous DCM were added into an over-dried reaction tube equipped with a stir bar, and the solution was stirred at -20 °C for 15min. Subsequently, the 0.01mmol of Sc(OTf)<sub>3</sub> (4.9 mg, 0.05 eq) was added. The reaction mixture was stirred at the indicated temperature until the aziridine was completely exhausted (monitored by TLC). Then, the solvent was removed under reduced pressure, and the residue was purified by column chromatography on silica gel (petroleum ether/EtOAc) to give the corresponding product.

### 3. General procedure for the Sc(OTf)<sub>3</sub> catalyzed [3 + 2]-annulation reaction of aziridine **1** with *exo*-glycal **2b**

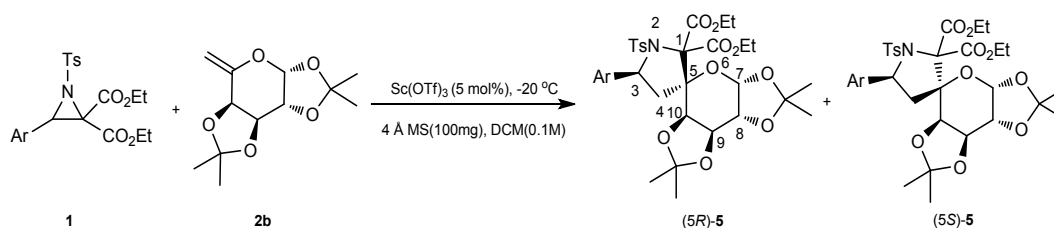

Under an atmosphere of dry nitrogen, activated 4 Å molecular sieves (100 mg), aziridine **1** (0.20 mmol, 1.0 equiv), *exo*-glycal **2b**<sup>3</sup> (0.6 mmol, 3 equiv) and 2mL of anhydrous DCM were added into an over-dried reaction tube equipped with a stir bar, and the solution was stirred at -20 °C for 15min. Subsequently, the 0.01mmol of Sc(OTf)<sub>3</sub> (4.9 mg, 0.05 eq) was added. The reaction mixture was stirred at the indicated temperature until the aziridine was completely exhausted (monitored by TLC). Then, the solvent was removed under reduced pressure, and the residue was purified by column chromatography on silica gel (petroleum ether/EtOAc) to give the corresponding product.

7972–7990. (b) S. N. Malkowski, C. F. Dishuck, G. G. Lamanilao, C. P. Embry, C. S. Grubb, M. Cafiero, L. W. Peterson. *Molecules* 2017, **22**, 1682.

(3) (a) S. Meng, W. H. Zhong, W. Yao, Z. J. Li, *Org. Lett.* 2020, **22**, 2981–2986. (b) N. Hussain, M. Babu Tatina, D. Mukherjee, *Org. Biomol. Chem.*, 2018, **16**, 2666–2677.

#### 4. Procedure for the gram-scale reaction of aziridine **11** with *exo*-glycal **2a**

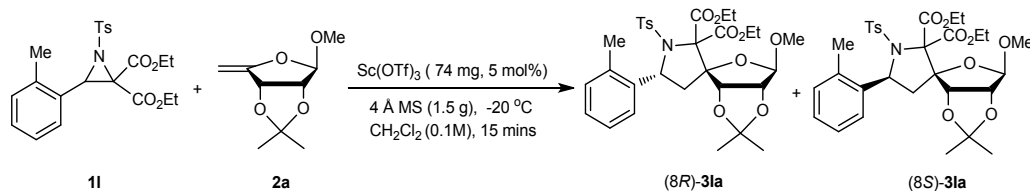

Under an atmosphere of dry nitrogen, activated 4 Å molecular sieves (1.5 g), aziridine **11** (3 mmol, 1.0 equiv, 1.29g), *exo*-glycal **2a** (3.6 mmol, 1.2 equiv, 0.67 g) and 30 mL of anhydrous DCM were added into an over-dried reaction tube equipped with a stir bar, and the solution was stirred at -20 °C for 15min. Subsequently, the 0.15 mmol of Sc(OTf)<sub>3</sub> (74mg, 0.05 eq) was added. The reaction mixture was stirred at the indicated temperature until the aziridine was completely exhausted (monitored by TLC). Then, the solvent was removed under reduced pressure, and the residue was purified by column chromatography on silica gel (petroleum ether/EtOAc) to give the corresponding products **(8R)-3la** (1.06 g, 1.66 mmol, 58%) and **(8S)-3la** (0.62g, 0.97 mmol, 34%) .

#### 5. Procedure for the detosylation of the annulation product **(8S)-3aa**

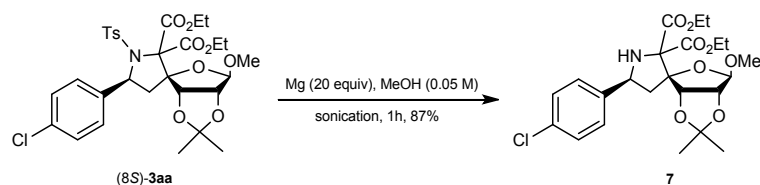

According to the previous report on the method for detosylation,<sup>4</sup> compound **(8S)-3aa** (63.7 mg, 0.1 mmol) in anhydrous MeOH (2 mL) was treated with Mg powder (48.6mg, 2 mmol) and the mixture was sonicated for 1 h. After removal of the solvent

(4) W. G. He, J. D. Hu, P. Y. Wang, L. Chen, K. Ji, S. Y. Yang, Y. Li, Z. L. Xie, W. Q. Xie, *Angew. Chem. Int. Ed.*, 2018, **57**, 3806–3809.

under vacuum, the residue was diluted with  $\text{CH}_2\text{Cl}_2$  and filtrated with Celite pad. The solvent was removed under vacuum and the residue was purified by column chromatography on silica gel directly ( petroleum ether/EtOAc = 4:1,  $R_f = 0.37$  ) to afford **7** (42.1 mg, 87% isolated yield).

## 6. Procedure for the hydrolysis of annulation product (8R)-3la

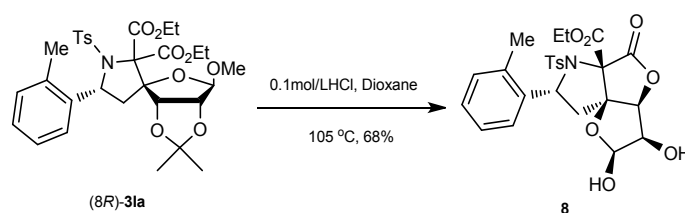

Hydrolysis of the product (8R)-**3la** was carried out according to the literature.<sup>5</sup> To a solution of (8R)-**3la** (185.3 mg, 0.3 mmol) in dioxane (2ml) was added 0.1M HCl (1ml) and the reaction mixture was refluxed for 4h. The solution was neutralized with 0.5M NaOH, the solvent were removed in vacuo and the residue was dissolved in EtOAc. The combined organic layer was dried and concentrated in vacuo to afford the crude product, which was purified by column chromatography on silica gel (EtOAc /petroleum ether = 2: 1,  $R_f = 0.4$  ) to afford **8** (105.4 mg, 68% isolated yield).

---

(5) D. W. Gammon, R. Hunter, S. Wilson, *Tetrahedron Lett.* 2002, **43** , 3141-3144.

## 7. Characterization data of Products

### Diethyl 3-(3-chlorophenyl)-1-tosylaziridine-2,2-dicarboxylate (1k)

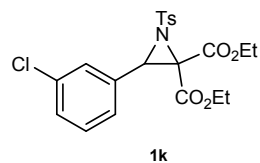

Colorless liquid (petroleum ether/EtOAc = 5:1, 72% isolated yield);  $^1\text{H}$  NMR (400 MHz,  $\text{CDCl}_3$ ):  $\delta$  (ppm) 7.97 (d,  $J = 8.4$  Hz, 2H), 7.37 (d,  $J = 8.0$  Hz, 2H), 7.33 (d,  $J = 7.6$  Hz, 1H), 7.24—7.20 (m, 1H), 7.12–7.09 (m, 2H), 5.05 (s, 1H), 4.44—4.38 (q,  $J = 7.2$  Hz, 2H), 3.99–3.87 (m, 2H), 2.46 (s, 3H), 1.38 (t,  $J = 7.2$  Hz, 3H), 0.86 (t,  $J = 7.2$  Hz, 3H);  $^{13}\text{C}$  NMR (100 MHz,  $\text{CDCl}_3$ ):  $\delta$  162.8, 162.3, 145.1, 136.2, 134.1, 130.1, 129.9, 129.4, 129.2, 128.5, 127.9, 126.7, 63.4, 62.2, 56.7, 48.1, 21.8, 13.8, 13.6; HRMS calcd for  $\text{C}_{21}\text{H}_{23}\text{ClNO}_6\text{S}$   $[\text{M}+\text{H}]^+$  452.0929, found 452.0928.

### Diethyl 3-(o-tolyl)-1-tosylaziridine-2,2-dicarboxylate (1l)

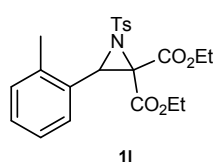

White solid (petroleum ether/EtOAc = 5:1, 66% isolated yield); mp:90–93 °C;  $^1\text{H}$  NMR (400 MHz,  $\text{CDCl}_3$ ):  $\delta$  (ppm) 7.99 (d,  $J = 8.4$  Hz, 2H), 7.37 (d,  $J = 8.0$  Hz, 2H), 7.19—7.14 (m, 1H), 7.11 (d,  $J = 6.8$  Hz, 1H), 7.03 (d,  $J = 4.0$  Hz, 2H), 4.85 (s, 1H), 4.44—4.38 (m, 2H), 3.93—3.85 (m, 2H), 2.47 (s, 3H), 2.43 (s, 3H), 1.38 (t,  $J = 7.0$  Hz, 3H), 0.80 (t,  $J = 7.2$  Hz, 3H);  $^{13}\text{C}$  NMR (100 MHz,  $\text{CDCl}_3$ ):  $\delta$  163.3, 162.7, 145.0, 137.2, 136.2, 129.9, 129.8, 129.3, 128.8, 128.0, 126.7, 125.8, 63.5, 62.2, 56.7, 48.8, 21.9, 18.9, 13.9, 13.6; HRMS calcd for  $\text{C}_{22}\text{H}_{26}\text{NO}_6\text{S}$   $[\text{M}+\text{H}]^+$  432.1475, found 432.1472.

### Dimethyl 3-(4-chlorophenyl)-1-tosylaziridine-2,2-dicarboxylate (1p)

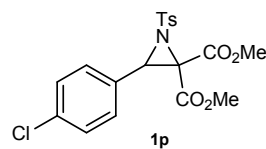

White solid (petroleum ether/EtOAc = 5:1, 75% isolated yield); mp:115–118 °C;  $^1\text{H}$  NMR (400 MHz,  $\text{CDCl}_3$ ):  $\delta$  (ppm) 7.93 (d,  $J = 8.4$  Hz, 2H), 7.36 (d,  $J = 8.0$  Hz, 2H), 7.25 (d,  $J = 8.4$  Hz, 2H), 7.18 (d,  $J = 8.8$  Hz, 2H), 4.84 (s, 3H), 3.93 (s, 3H), 3.52 (s, 3H), 2.46 (s, 3H);  $^{13}\text{C}$  NMR (100 MHz,  $\text{CDCl}_3$ ):  $\delta$  163.5, 162.9, 145.2, 136.1, 135.1, 130.0, 129.6, 128.9, 128.5, 127.9, 57.4, 54.2, 53.3, 49.0, 21.8; HRMS calcd for  $\text{C}_{19}\text{H}_{19}\text{ClNO}_6\text{S}$   $[\text{M}+\text{H}]^+$  424.0616, found 424.0617.

**(2*R*,3*R*,4*S*,5*R*,8*R*)-diethyl 8-(4-chlorophenyl)-3,4-*O*-isopropylidene-2-methoxy-7-tosyl-1-oxa-7-azaspiro[4.4]nonane-6,6-dicarboxylate ((8*R*)-3aa)**

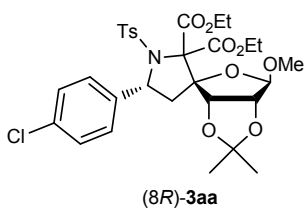

White solid (petroleum ether/EtOAc = 4:1,  $R_f$  = 0.45, 54% isolated yield); mp:129–131 °C;  $[\alpha]_D^{20}$  = -43 (c 1.0, CH<sub>2</sub>Cl<sub>2</sub>); <sup>1</sup>H NMR (400 MHz, CDCl<sub>3</sub>) δ 7.49 (d,  $J$  = 8.4 Hz, 2H), 7.08 (d,  $J$  = 8.4 Hz, 2H), 6.98 (dd,  $J$  = 16.0, 8.0 Hz, 4H), 5.53 (d,  $J$  = 10.4 Hz, 1H), 4.99 (d,  $J$  = 6.8 Hz, 1H), 4.62 (d,  $J$  = 2.0 Hz, 1H), 4.52–4.38 (m, 4H), 3.33 (dd,  $J$  = 13.6, 10.4 Hz, 1H), 3.11 (s, 3H), 2.32 (s, 3H), 1.82 (d,  $J$  = 14.4 Hz, 1H), 1.42 (t,  $J$  = 7.2 Hz, 3H), 1.42 (s, 3H), 1.38 (t,  $J$  = 7.2 Hz, 3H), 1.28 (s, 3H); <sup>13</sup>C NMR (100 MHz, CDCl<sub>3</sub>) δ 167.3, 165.8, 143.4, 140.3, 137.3, 132.3, 129.1, 128.8, 128.4, 127.5, 114.5, 109.0, 98.1, 85.1, 83.5, 80.3, 63.1, 63.0, 62.6, 56.6, 43.0, 26.2, 24.8, 21.6, 14.1, 14.1; HRMS calcd for C<sub>30</sub>H<sub>37</sub>ClNO<sub>10</sub>S [M+H]<sup>+</sup>: 638.1822, found for: 638.1824.

**(2*R*,3*R*,4*S*,5*R*,8*S*)-diethyl 8-(4-chlorophenyl)-3,4-*O*-isopropylidene-2-methoxy-7-tosyl-1-oxa-7-azaspiro[4.4]nonane-6,6-dicarboxylate ((8*S*)-3aa)**

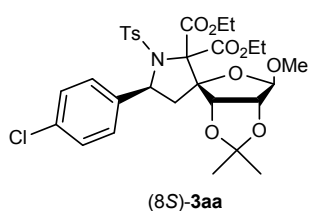

White solid (petroleum ether/EtOAc = 4:1,  $R_f$  = 0.37, 45% isolated yield); mp:150–152 °C;  $[\alpha]_D^{20}$  = -30 (c 1.0, CH<sub>2</sub>Cl<sub>2</sub>); <sup>1</sup>H NMR (400 MHz, CDCl<sub>3</sub>) δ 7.29 (d,  $J$  = 8.4 Hz, 2H), 7.01–6.98 (m, 4H), 6.92 (d,  $J$  = 8.4 Hz, 2H), 5.05 (t,  $J$  = 7.4 Hz, 1H), 5.00 (d,  $J$  = 6.4 Hz, 1H), 4.93 (d,  $J$  = 1.2 Hz, 1H), 4.56 (dd,  $J$  = 6.4, 1.2 Hz, 1H), 4.52–4.42 (m, 2H), 4.39–4.27 (m, 2H), 3.41 (s, 3H), 2.72 (dd,  $J$  = 13.2, 7.2 Hz, 1H), 2.42 (dd,  $J$  = 13.2, 7.6 Hz, 1H), 2.35 (s, 3H), 1.42 (t,  $J$  = 7.2 Hz, 3H), 1.41 (t,  $J$  = 7.2, 3H), 1.33 (s, 3H), 1.21 (s, 3H); <sup>13</sup>C NMR (100 MHz, CDCl<sub>3</sub>) δ 167.8, 165.5, 143.0, 138.8, 136.6, 133.6, 130.2, 128.7, 128.1, 127.8, 113.3, 110.0, 95.8, 85.6, 81.3, 81.2, 62.7, 62.5, 61.9, 56.9, 42.6, 26.2, 24.9, 21.6, 14.2, 14.1; HRMS calcd for C<sub>30</sub>H<sub>37</sub>ClNO<sub>10</sub>S [M+H]<sup>+</sup>: 638.1822, found for: 638.1821.

**(2*R*,3*R*,4*S*,5*R*,8*R*)-diethyl 8-phenyl-3,4-*O*-isopropylidene-2-methoxy-7-tosyl-1-oxa-7-azaspiro[4.4]nonane-6,6-dicarboxylate ((8*R*)-3ba)**

White solid (petroleum ether/EtOAc = 4:1,  $R_f$  = 0.45, 62% isolated yield); mp:110–112 °C;  $[\alpha]_D^{20}$  = -27 (c 1.0, CH<sub>2</sub>Cl<sub>2</sub>); <sup>1</sup>H NMR (400 MHz, CDCl<sub>3</sub>) δ 7.43 (d,  $J$  = 8.0

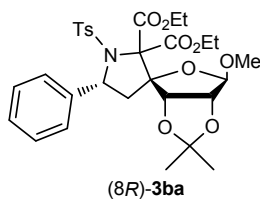

Hz, 2H), 7.17 (d,  $J = 6.8$  Hz, 2H), 7.05–6.99 (m, 3H), 6.94 (d,  $J = 8.0$  Hz, 2H), 5.60 (d,  $J = 10.4$  Hz, 1H), 5.00 (d,  $J = 7.2$  Hz, 1H), 4.62 (d,  $J = 2.0$  Hz, 1H), 4.53–4.47 (m, 2H), 4.42–4.14 (m, 2H), 4.20–4.14 (m, 1H), 3.34 (dd,  $J = 13.6, 10.8$  Hz, 1H), 3.11 (s, 3H), 2.28 (s, 3H), 1.88 (d,  $J = 13.6$  Hz, 1H), 1.43 (t,  $J = 7.2$  Hz, 3H), 1.42 (s, 3H), 1.40–1.36 (t,  $J = 7.2$  Hz, 3H), 1.28 (s, 3H);  $^{13}\text{C}$  NMR (100 MHz,  $\text{CDCl}_3$ )  $\delta$  167.5, 165.8, 142.9, 141.6, 137.6, 128.8, 128.3, 127.7, 127.5, 126.6, 114.5, 108.9, 97.9, 85.1, 83.5, 80.4, 63.8, 62.9, 62.5, 56.6, 42.9, 26.2, 24.8, 21.5, 14.1; HRMS calcd for  $\text{C}_{30}\text{H}_{38}\text{NO}_{10}\text{S}$   $[\text{M}+\text{H}]^+$ : 604.2212, found for: 604.2213.

**(2R,3R,4S,5R,8S)-diethyl 8-phenyl-3,4-O-isopropylidene-2-methoxy-7-tosyl-1-oxa-7-azaspiro[4.4]nonane-6,6-dicarboxylate ((8S)-3ba)**

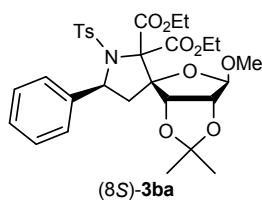

White solid (petroleum ether/EtOAc = 5:1,  $R_f = 0.36$ , 37% isolated yield); mp: 99–101 °C;  $[\alpha]_{\text{D}}^{20} = -50$  (c 1.0,  $\text{CH}_2\text{Cl}_2$ );  $^1\text{H}$  NMR (400 MHz,  $\text{CDCl}_3$ )  $\delta$  7.28 (d,  $J = 8.0$  Hz, 2H), 7.10–7.07 (m, 3H), 7.00–6.93 (m, 4H), 5.09 (t,  $J = 7.6$  Hz, 1H), 5.01 (d,  $J = 6.4$  Hz, 1H), 4.93 (s, 1H), 4.55 (d,  $J = 1.2$  Hz, 1H), 4.54–4.42 (m, 2H), 4.38–4.28 (m, 2H), 3.41 (s, 3H), 2.77 (dd,  $J = 13.2, 7.2$  Hz, 1H), 2.43 (dd,  $J = 12.8, 7.6$  Hz, 1H), 2.31 (s, 3H), 1.42 (t,  $J = 7.2$  Hz, 3H), 1.41 (t,  $J = 7.2$ , 3H), 1.32 (s, 3H), 1.18 (s, 3H);  $^{13}\text{C}$  NMR (100 MHz,  $\text{CDCl}_3$ )  $\delta$  167.8, 165.6, 142.5, 138.8, 138.0, 128.8, 128.6, 128.1, 127.7, 127.5, 113.2, 110.0, 95.8, 85.5, 81.4, 81.2, 62.6, 62.6, 62.4, 56.9, 42.8, 26.2, 24.8, 21.5, 14.2, 14.0; HRMS calcd for  $\text{C}_{30}\text{H}_{38}\text{NO}_{10}\text{S}$   $[\text{M}+\text{H}]^+$ : 604.2212, found for: 604.2213.

**(2R,3R,4S,5R,8R)-diethyl 8-(4-fluorophenyl)-3,4-O-isopropylidene-2-methoxy-7-tosyl-1-oxa-7-azaspiro[4.4]nonane-6,6-dicarboxylate ((8R)-3ca)**

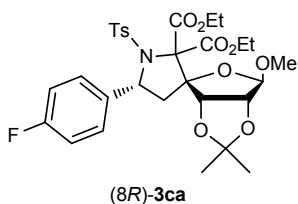

White solid (petroleum ether/EtOAc = 4:1,  $R_f = 0.46$ , 53% isolated yield); mp: 118–120 °C;  $[\alpha]_{\text{D}}^{20} = -26$  (c 1.0,  $\text{CH}_2\text{Cl}_2$ );  $^1\text{H}$  NMR (400 MHz,  $\text{CDCl}_3$ )  $\delta$  7.47 (d,  $J = 8.4$  Hz, 2H), 7.13 (dd,  $J = 8.8, 5.6$  Hz, 2H), 6.99 (d,  $J = 8.0$  Hz, 2H), 6.69 (t,  $J = 8.8$  Hz, 2H), 5.57 (d,  $J = 10.4$  Hz, 1H), 4.99 (d,  $J = 6.8$  Hz, 1H), 4.62 (d,  $J = 2.0$  Hz,



1H), 4.54–4.47 (m, 2H), 4.46–4.38 (m, 2H), 4.18–4.14(m,1H), 3.33 (dd,  $J = 13.6, 10.4$  Hz, 1H), 3.12 (s, 3H), 2.30 (s, 3H), 1.83 (d,  $J = 14.0$  Hz, 1H), 1.42 (t,  $J = 7.2$  Hz, 3H), 1.41 (s, 3H), 1.38 (t,  $J = 7.2$  Hz, 3H), 1.28 (s, 3H);  $^{19}\text{F}$  NMR (376 MHz,  $\text{CDCl}_3$ )  $\delta$  -116.72;  $^{13}\text{C}$  NMR (100 MHz,  $\text{CDCl}_3$ )  $\delta$  167.4, 165.8, 161.7 (d,  $J = 14.0$  Hz), 160.5, 143.2, 137.5, 137.4, 137.4, 129.3 (d,  $J = 8.0$  Hz), 128.6(d,  $J = 39.5$  Hz), 114.2(d,  $J = 21.2$  Hz), 114.1, 109.0, 98.0, 85.1, 83.5, 80.3, 63.1, 63.0, 62.6, 56.7, 43.0, 26.2, 24.8, 21.6, 14.1; HRMS calcd for  $\text{C}_{30}\text{H}_{37}\text{FNO}_{10}\text{S}$   $[\text{M}+\text{H}]^+$ : 622.2117, found for: 622.2117.

**(2*R*,3*R*,4*S*,5*R*,8*S*)-diethyl 8-(4-fluorophenyl)-3,4-O-isopropylidene-2-methoxy-7-tosyl-1-oxa-7-azaspiro[4.4]nonane-6,6-dicarboxylate ((8*S*)-3ca)**

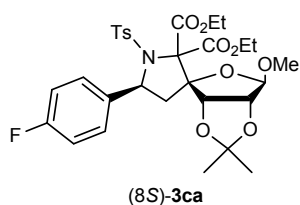

White solid (petroleum ether/EtOAc = 4:1,  $R_f = 0.37$ , 36% isolated yield); mp: 145–147 °C;  $[\alpha]_{\text{D}}^{20} = -46$  (c 1.0,  $\text{CH}_2\text{Cl}_2$ );  $^1\text{H}$  NMR (400 MHz,  $\text{CDCl}_3$ )  $\delta$  7.29 (d, 8.4 Hz, 2H), 7.04 (dd,  $J = 8.4, 5.2$  Hz, 2H), 6.99 (d,  $J = 8.0$  Hz, 2H), 6.66 (t,  $J = 8.8$  Hz, 2H), 5.07 (t,  $J = 7.2$  Hz, 1H), 5.02 (d,  $J = 6.4$  Hz, 1H), 4.94 (d,  $J = 1.2$  Hz, 1H), 4.56 (dd,  $J = 6.4, 1.2$  Hz, 1H), 4.53–4.43 (m, 2H), 4.39–4.28 (m, 2H), 3.41 (s, 3H), 2.73 (dd,  $J = 12.8, 7.2$  Hz, 1H), 2.41 (dd,  $J = 12.8, 7.6$  Hz, 1H), 2.33 (s, 3H), 1.42 (t,  $J = 7.2$  Hz, 3H), 1.41 (t,  $J = 7.2$ , 3H), 1.33 (s, 3H), 1.21 (s, 3H);  $^{19}\text{F}$  NMR (376 MHz,  $\text{CDCl}_3$ )  $\delta$  -114.97;  $^{13}\text{C}$  NMR (100 MHz,  $\text{CDCl}_3$ )  $\delta$  167.8, 165.6, 162.3 (d,  $J = 244.9$  Hz), 142.8, 138.8, 133.6 (d,  $J = 2.9$  Hz), 130.4 (d,  $J = 8.3$  Hz), 128.6, 128.0, 114.4 (d,  $J = 21.3$  Hz), 113.2, 109.9, 95.7, 85.5, 81.3, 81.1, 62.7, 62.4, 61.8, 56.9, 42.6, 26.2, 24.8, 21.5, 14.1, 14.0; HRMS calcd for  $\text{C}_{30}\text{H}_{37}\text{FNO}_{10}\text{S}$   $[\text{M}+\text{H}]^+$ : 622.2117, found for: 622.2119.

**(2*R*,3*R*,4*S*,5*R*,8*R*)-diethyl 8-(4-bromophenyl)-3,4-O-isopropylidene-2-methoxy-7-tosyl-1-oxa-7-azaspiro[4.4]nonane-6,6-dicarboxylate ((8*R*)-3da)**

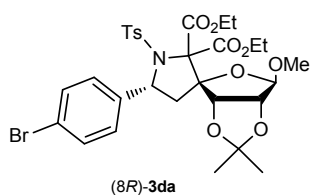

White solid (petroleum ether/EtOAc = 4:1,  $R_f = 0.46$ , 62% isolated yield); mp: 102–110 °C;  $[\alpha]_{\text{D}}^{20} = -23$  (c 1.0,  $\text{CH}_2\text{Cl}_2$ );  $^1\text{H}$  NMR (400 MHz,  $\text{CDCl}_3$ )  $\delta$  7.49 (d,  $J = 8.4$  Hz, 2H), 7.11 (d,  $J = 8.4$  Hz, 2H), 7.01 (t,  $J = 8.8$  Hz, 4H), 5.51 (d,  $J = 10.4$  Hz, 1H), 4.99 (d,  $J = 7.2$  Hz, 1H), 4.62 (d,  $J = 2.0$  Hz, 1H), 4.54–4.46 (m, 2H), 4.46–4.38 (m, 2H), 4.20–4.12 (m, 1H), 3.33 (dd,  $J = 13.6, 10.4$  Hz, 1H), 3.12 (s, 3H),

2.33 (s, 3H), 1.82 (d,  $J = 14.0$  Hz, 1H), 1.42 (t,  $J = 7.2$  Hz, 3H), 1.42 (s, 3H), 1.38 (t,  $J = 7.2$  Hz, 3H), 1.28 (s, 3H);  $^{13}\text{C}$  NMR (100 MHz,  $\text{CDCl}_3$ )  $\delta$  167.3, 165.7, 143.4, 140.8, 137.3, 130.5, 129.5, 128.8, 128.5, 120.4, 114.5, 109.1, 98.1, 85.2, 83.5, 80.4, 63.1, 63.0, 62.6, 56.7, 43.0, 26.2, 24.8, 21.6, 14.1, 14.1; HRMS calcd for  $\text{C}_{30}\text{H}_{37}\text{BrNO}_{10}\text{S}$   $[\text{M}+\text{H}]^+$ : 682.1316, found for: 682.1319.

**(2*R*,3*R*,4*S*,5*R*,8*R*)-diethyl 8-(4-bromophenyl)-3,4-O-isopropylidene-2-methoxy-7-tosyl-1-oxa-7-azaspiro[4.4]nonane-6,6-dicarboxylate ((8*S*)-3da)**

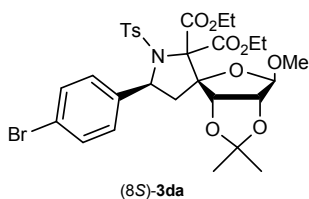

White solid (petroleum ether/EtOAc = 4:1,  $R_f = 0.37$ , 36% isolated yield); mp: 133–136 °C;  $[\alpha]_{\text{D}}^{20} = -25$  (c 1.0,  $\text{CH}_2\text{Cl}_2$ );  $^1\text{H}$  NMR (400 MHz,  $\text{CDCl}_3$ )  $\delta$  7.28 (d,  $J = 5.6$  Hz, 2H), 7.07 (d,  $J = 8.8$  Hz, 2H), 6.99 (d,  $J = 8.0$  Hz, 2H), 6.94 (d,  $J = 8.4$  Hz, 2H), 5.01 (d,  $J = 6.8$  Hz, 2H), 4.93 (s, 1H), 4.55 (d,  $J = 6.0$  Hz, 1H), 4.52–4.42 (m, 2H), 4.39–4.27 (m, 2H), 3.41 (s, 3H), 2.71 (dd,  $J = 12.8, 7.2$  Hz, 1H), 2.40 (dd,  $J = 12.8, 7.6$  Hz, 1H), 2.36 (s, 3H), 1.42 (t,  $J = 7.2$  Hz, 3H), 1.41 (t,  $J = 7.2$ , 3H), 1.34 (s, 3H), 1.21 (s, 3H);  $^{13}\text{C}$  NMR (100 MHz,  $\text{CDCl}_3$ )  $\delta$  167.8, 165.5, 143.0, 138.8, 136.9, 130.7, 130.5, 128.7, 128.0, 121.8, 113.3, 109.9, 95.7, 85.6, 81.3, 81.2, 62.7, 62.5, 61.9, 56.9, 42.5, 26.2, 24.9, 21.6, 14.2, 14.0; HRMS calcd for  $\text{C}_{30}\text{H}_{37}\text{BrNO}_{10}\text{S}$   $[\text{M}+\text{H}]^+$ : 682.1316, found for: 682.1318.

**(2*R*,3*R*,4*S*,5*R*,8*R*)-diethyl 8-(4-cyanophenyl)-3,4-O-isopropylidene-2-methoxy-7-tosyl-1-oxa-7-azaspiro[4.4]nonane-6,6-dicarboxylate ((8*R*)-3ea)**

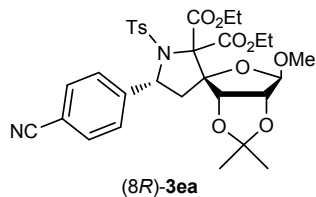

White solid (petroleum ether/EtOAc = 4:1,  $R_f = 0.34$ , 71% isolated yield); mp: 212–214 °C;  $[\alpha]_{\text{D}}^{20} = -52$  (c 1.0,  $\text{CH}_2\text{Cl}_2$ );  $^1\text{H}$  NMR (400 MHz,  $\text{CDCl}_3$ )  $\delta$  7.54 (d,  $J = 8.4$  Hz, 2H), 7.29–7.22 (m, 4H), 7.01 (d,  $J = 8.4$  Hz, 2H), 5.59 (d,  $J = 10.4$  Hz, 1H), 4.98 (d,  $J = 7.2$  Hz, 1H), 4.55 (d,  $J = 2.4$  Hz, 1H), 4.55–4.47 (m, 2H), 4.45–4.39 (m, 2H), 4.18–4.14 (m, 1H), 3.38 (dd,  $J = 13.6, 10.4$  Hz, 1H), 3.06 (s, 3H), 2.33 (s, 3H), 1.83 (d,  $J = 14.0$  Hz, 1H), 1.42 (s, 3H), 1.42 (t,  $J = 7.2$  Hz, 3H), 1.40 (t,  $J = 7.2$  Hz, 3H), 1.28 (s, 3H);  $^{13}\text{C}$  NMR (100 MHz,  $\text{CDCl}_3$ )  $\delta$  167.1, 165.8, 147.4, 143.7, 137.0, 131.2, 128.8, 128.6, 128.2, 119.1, 114.5, 110.1, 109.1, 98.2, 85.1, 83.5, 80.2, 63.1, 63.0, 62.7, 56.6, 43.3, 26.1, 24.7, 21.6, 14.0, 14.0; HRMS calcd for

$C_{31}H_{37}N_2O_{10}S$   $[M+H]^+$ : 629.2163, found for: 629.2167.

**(2*R*,3*R*,4*S*,5*R*,8*R*)-diethyl 8-(4-cyanophenyl)-3,4-*O*-isopropylidene-2-methoxy-7-tosyl-1-oxa-7-azaspiro[4.4]nonane-6,6-dicarboxylate ((8*S*)-3ea)**

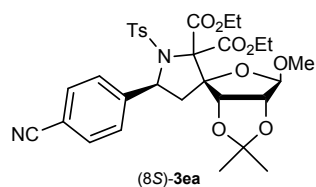

White solid (petroleum ether/EtOAc = 4:1,  $R_f$  = 0.31, 25% isolated yield); mp: 170–172 °C;  $[\alpha]_D^{20}$  = -42 (c 1.0,  $CH_2Cl_2$ );  $^1H$  NMR (400 MHz,  $CDCl_3$ )  $\delta$  7.40 (d,  $J$  = 8.4 Hz, 2H), 7.29 (d,  $J$  = 8.0 Hz, 2H), 7.18 (d,  $J$  = 8.0 Hz, 2H), 7.04 (d,  $J$  = 8.4 Hz, 2H), 5.19 (dd,  $J$  = 8.0, 5.6 Hz, 1H), 4.91 (d,  $J$  = 1.2 Hz, 1H), 4.86 (d,  $J$  = 6.30 Hz, 1H), 4.56–4.42 (m, 3H), 4.36–4.28 (m, 2H), 3.39 (s, 3H), 2.71–2.62 (m, 2H), 2.36 (s, 3H), 1.43 (t,  $J$  = 7.2 Hz, 3H), 1.41 (t,  $J$  = 7.2, 3H), 1.27 (s, 3H), 1.11 (s, 3H);  $^{13}C$  NMR (100 MHz,  $CDCl_3$ )  $\delta$  167.7, 165.5, 144.7, 143.5, 138.1, 131.4, 128.9, 128.8, 128.3, 118.8, 113.1, 111.0, 110.2, 96.2, 85.8, 81.4, 81.2, 62.8, 62.6, 61.6, 56.8, 42.2, 26.1, 24.7, 21.6, 14.1, 14.0; HRMS calcd for  $C_{31}H_{37}N_2O_{10}S$   $[M+H]^+$ : 629.2163, found for: 629.2165.

**(2*R*,3*R*,4*S*,5*R*,8*R*)-diethyl 8-(4-nitrophenyl)-3,4-*O*-isopropylidene-2-methoxy-7-tosyl-1-oxa-7-azaspiro[4.4]nonane-6,6-dicarboxylate ((8*R*)-3fa)**

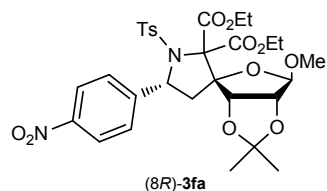

White solid (petroleum ether/EtOAc = 4:1,  $R_f$  = 0.36, 70% isolated yield); mp: 121–125 °C;  $[\alpha]_D^{20}$  = -26 (c 1.0,  $CH_2Cl_2$ );  $^1H$  NMR (400 MHz,  $CDCl_3$ )  $\delta$  7.84 (d,  $J$  = 8.8 Hz, 2H), 7.57 (d,  $J$  = 8.4 Hz, 2H), 7.29 (d,  $J$  = 8.8 Hz, 2H), 7.01 (d,  $J$  = 8.0 Hz, 2H), 5.63 (d,  $J$  = 10.4 Hz, 1H), 4.99 (d,  $J$  = 6.8 Hz, 1H), 4.57–4.48 (m, 3H), 4.46–4.40 (m, 2H), 4.21–4.13 (m, 1H), 3.41 (dd,  $J$  = 13.6, 10.4 Hz, 1H), 3.07 (s, 3H), 2.30 (s, 3H), 1.85 (d,  $J$  = 14.0 Hz, 1H), 1.43 (t,  $J$  = 7.2 Hz, 3H), 1.41 (s, 3H), 1.41 (t,  $J$  = 7.2 Hz, 3H), 1.29 (s, 3H);  $^{13}C$  NMR (100 MHz,  $CDCl_3$ )  $\delta$  167.1, 165.8, 149.5, 146.5, 143.9, 137.0, 128.9, 128.7, 128.3, 122.6, 114.5, 109.2, 98.4, 85.2, 83.5, 80.3, 63.1, 62.9, 62.8, 56.6, 43.4, 26.2, 24.7, 21.6, 14.1, 14.1; HRMS calcd for  $C_{30}H_{37}N_2O_{12}S$   $[M+H]^+$ : 649.2062, found for: 649.2064.

**(2*R*,3*R*,4*S*,5*R*,8*R*)-diethyl 8-(4-nitrophenyl)-3,4-*O*-isopropylidene-2-methoxy-7-tosyl-1-oxa-7-azaspiro[4.4]nonane-6,6-dicarboxylate ((8*S*)-3fa)**

White solid (petroleum ether/EtOAc = 4:1,  $R_f$  = 0.31, 27% isolated yield); mp: 146–

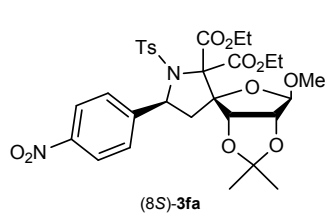

148 °C;  $[\alpha]_D^{20} = -44$  (c 1.0, CH<sub>2</sub>Cl<sub>2</sub>); <sup>1</sup>H NMR (400 MHz, CDCl<sub>3</sub>) δ 7.84 (d, *J* = 8.8 Hz, 2H), 7.40 (d, *J* = 8.4 Hz, 2H), 7.24 (d, *J* = 8.4 Hz, 2H), 7.00 (d, *J* = 8.4 Hz, 2H), 5.22 (dd, *J* = 8.0, 5.6 Hz, 1H), 4.92 (d, *J* = 6.4 Hz, 2H), 4.56–4.43 (m, 3H), 4.38–4.29 (m, 2H), 3.40 (s, 3H), 2.74–2.61 (m, 2H), 2.34 (s, 3H), 1.44 (t, *J* = 7.2, 3H), 1.42 (t, *J* = 7.2, 3H), 1.27 (s, 3H), 1.13 (s, 3H); <sup>13</sup>C NMR (100 MHz, CDCl<sub>3</sub>) δ 167.8, 165.4, 147.1, 146.6, 143.7, 138.1, 129.1, 128.8, 128.3, 122.8, 113.2, 110.2, 96.2, 85.8, 62.9, 62.7, 61.4, 56.9, 42.3, 26.2, 24.8, 21.6, 14.2, 14.0; HRMS calcd for C<sub>30</sub>H<sub>37</sub>N<sub>2</sub>O<sub>12</sub>S [M+H]<sup>+</sup>: 649.2062, found for: 649.2064.

**(2R,3R,4S,5R,8R)-diethyl 8-(4-trifluoromethylphenyl)-3,4-O-isopropylidene-2-methoxy-7-tosyl-1-oxa-7-azaspiro[4.4]nonane-6,6-dicarboxylate ((8R)-3ga)**

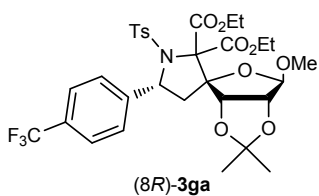

White solid (petroleum ether/EtOAc = 4:1, *R<sub>f</sub>* = 0.45, 60% isolated yield); mp: 120–124 °C;  $[\alpha]_D^{20} = -16$  (c 1.0, CH<sub>2</sub>Cl<sub>2</sub>); <sup>1</sup>H NMR (400 MHz, CDCl<sub>3</sub>) δ 7.50 (d, *J* = 6.8 Hz, 2H), 7.26–7.20 (m, 4H), 6.94 (d, *J* = 7.2 Hz, 2H), 5.58 (d, *J* = 10.4 Hz, 1H), 5.00–4.99 (m, 1H), 4.61 (s, 1H), 4.54–4.40 (m, 4H), 4.24–4.13 (m, 1H), 3.37 (t, *J* = 12.4 Hz, 1H), 3.11 (d, *J* = 1.6 Hz, 3H), 2.27 (s, 3H), 1.86 (d, *J* = 13.6 Hz, 1H), 1.43 (t, *J* = 7.2 Hz, 3H), 1.42 (s, 3H), 1.40 (t, *J* = 7.2 Hz, 3H), 1.28 (s, 3H); <sup>19</sup>F NMR (376 MHz, CDCl<sub>3</sub>) δ -62.48; <sup>13</sup>C NMR (100 MHz, CDCl<sub>3</sub>) δ 167.2, 165.7, 145.8, 143.5, 137.1, 128.8, 128.5, 128.4, 128.0, 124.3 (q, *J* = 3.7 Hz), 114.5, 109.1, 98.2, 85.2, 83.5, 80.3, 63.1, 63.0, 62.6, 56.6, 43.0, 26.2, 24.8, 21.4, 14.1, 14.1; HRMS calcd for C<sub>31</sub>H<sub>37</sub>F<sub>3</sub>NO<sub>10</sub>S [M+H]<sup>+</sup>: 672.2085, found for: 672.2086.

**(2R,3R,4S,5R,8R)-diethyl 8-(4-trifluoromethylphenyl)-3,4-O-isopropylidene-2-methoxy-7-tosyl-1-oxa-7-azaspiro[4.4]nonane-6,6-dicarboxylate ((8S)-3ga)**

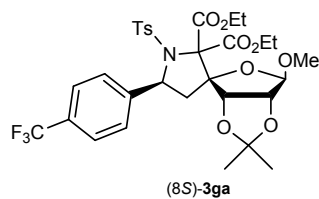

White solid (petroleum ether/EtOAc = 4:1, *R<sub>f</sub>* = 0.38, 26% isolated yield); mp: 128–130 °C;  $[\alpha]_D^{20} = -34$  (c 1.0, CH<sub>2</sub>Cl<sub>2</sub>); <sup>1</sup>H NMR (400 MHz, CDCl<sub>3</sub>) δ 7.28 (d, *J* = 8.8 Hz, 2H), 7.21–7.16 (m, 4H), 6.93 (d, *J* = 8.0 Hz, 2H), 5.15 (t, *J* = 7.2 Hz, 1H), 5.00 (d, *J* = 6.4 Hz, 1H), 4.94 (d, *J* = 1.2 Hz, 1H), 4.56 (dd, *J* = 6.4, 1.2

Hz, 1H), 4.54–4.43 (m, 2H), 4.39–4.29 (m, 2H), 3.41 (s, 3H), 2.74 (dd,  $J = 13.2, 6.4$  Hz, 1H), 2.50 (dd,  $J = 13.2, 8.0$  Hz, 1H), 2.31 (s, 3H), 1.43 (t,  $J = 7.2$  Hz, 3H), 1.42 (t,  $J = 7.2$  Hz, 3H), 1.31 (s, 3H), 1.18 (s, 3H);  $^{19}\text{F}$  NMR (376 MHz,  $\text{CDCl}_3$ )  $\delta$  -62.66;  $^{13}\text{C}$  NMR (100 MHz,  $\text{CDCl}_3$ )  $\delta$  167.8, 165.5, 143.1, 142.3, 138.5, 129.0, 128.7, 128.0, 124.5, 124.5, 113.3, 110.1, 95.9, 85.6, 81.4, 81.2, 62.8, 62.5, 61.8, 56.9, 42.4, 26.2, 24.8, 21.4, 14.2, 14.0; HRMS calcd for  $\text{C}_{31}\text{H}_{37}\text{F}_3\text{NO}_{10}\text{S}$   $[\text{M}+\text{H}]^+$ : 672.2085, found for: 672.2089.

**(2*R*,3*R*,4*S*,5*R*,8*R*)-diethyl 8-(4-methylphenyl)-3,4-*O*-isopropylidene-2-methoxy-7-tosyl-1-oxa-7-azaspiro[4.4]nonane-6,6-dicarboxylate ((8*R*)-3ha)**

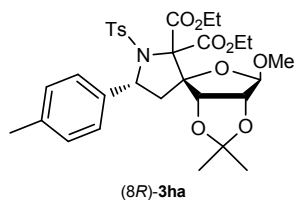

White solid (petroleum ether/EtOAc = 4:1,  $R_f = 0.46$ , 55% isolated yield); mp:130–132 °C;  $[\alpha]_{\text{D}}^{20} = -32$  (c 1.0,  $\text{CH}_2\text{Cl}_2$ );  $^1\text{H}$  NMR (400 MHz,  $\text{CDCl}_3$ )  $\delta$  7.41 (d,  $J = 8.4$  Hz, 2H), 7.07 (d,  $J = 7.6$  Hz, 2H), 6.94 (d,  $J = 8.0$  Hz, 2H), 6.83 (d,  $J = 7.6$

Hz, 2H), 5.55 (d,  $J = 10.4$  Hz, 1H), 5.00 (d,  $J = 6.8$  Hz, 1H), 4.66 (d,  $J = 1.6$  Hz, 1H), 4.53–4.47 (m, 2H), 4.45–4.39 (m, 2H), 4.19–4.11 (m, 1H), 3.32 (dd,  $J = 13.6, 10.8$  Hz, 1H), 3.15 (s, 3H), 2.28 (s, 3H), 2.24 (s, 3H), 1.86 (d,  $J = 13.6$  Hz, 1H), 1.42 (t,  $J = 7.2$  Hz, 3H), 1.40 (s, 3H), 1.37 (t,  $J = 7.2$  Hz, 3H), 1.28 (s, 3H);  $^{13}\text{C}$  NMR (400 MHz,  $\text{CDCl}_3$ )  $\delta$  167.6, 165.7, 142.7, 138.7, 137.7, 136.2, 128.7, 128.2, 128.2, 127.8, 114.4, 109.0, 97.9, 85.1, 83.5, 80.4, 63.7, 62.8, 62.4, 56.6, 42.9, 29.8, 26.2, 24.8, 21.5, 21.1, 14.1; HRMS calcd for  $\text{C}_{30}\text{H}_{40}\text{NO}_{10}\text{S}$   $[\text{M}+\text{H}]^+$ : 618.2367, found for: 618.2369.

**(2*R*,3*R*,4*S*,5*R*,8*S*)-diethyl 8-(4-methylphenyl)-3,4-*O*-isopropylidene-2-methoxy-7-tosyl-1-oxa-7-azaspiro[4.4]nonane-6,6-dicarboxylate ((8*S*)-3ha)**

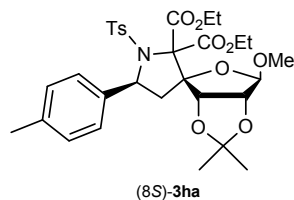

White solid (petroleum ether/EtOAc = 4:1,  $R_f = 0.33$ , 43% isolated yield); mp:162–174 °C;  $[\alpha]_{\text{D}}^{20} = -34$  (c 1.0,  $\text{CH}_2\text{Cl}_2$ );  $^1\text{H}$  NMR (400 MHz,  $\text{CDCl}_3$ )  $\delta$  7.23 (d,  $J = 7.6$  Hz, 2H), 6.92 (dd,  $J = 10.8, 6.8$  Hz, 4H), 6.77 (d,  $J = 6.4$  Hz, 2H), 5.07 (d,

$J = 6.0$  Hz, 1H), 4.97 (t,  $J = 7.4$  Hz, 1H), 4.94 (s, 1H), 4.54 (d,  $J = 6.4$  Hz, 1H), 4.49–4.41 (m, 2H), 4.39–4.26 (m, 2H), 3.41 (s, 3H), 2.81–2.76 (m, 1H), 2.32 (s, 4H), 2.24 (s, 3H), 1.42 (t,  $J = 7.2$  Hz, 3H), 1.41 (s, 3H), 1.35 (s, 3H), 1.24 (s, 3H);  $^{13}\text{C}$  NMR (100 MHz,  $\text{CDCl}_3$ )  $\delta$  167.7, 165.4, 142.1, 138.9, 137.4, 134.2, 128.9, 128.3, 128.2,

127.8, 113.2, 109.5, 95.4, 85.3, 81.1, 81.0, 62.5, 62.5, 62.2, 56.8, 42.9, 29.7, 26.0, 24.7, 21.4, 21.1, 14.0, 13.9; HRMS calcd for C<sub>30</sub>H<sub>40</sub>NO<sub>10</sub>S [M+H]<sup>+</sup>: 618.2367, found for: 618.2369.

**(2R,3R,4S,5R,8R)-diethyl 8-(4-methoxyphenyl)-3,4-O-isopropylidene-2-methoxy-7-tosyl-1-oxa-7-azaspiro[4.4]nonane-6,6-dicarboxylate ((8R)-3ia)**

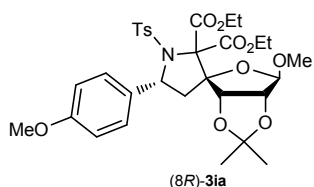

White solid (petroleum ether/EtOAc = 4:1,  $R_f$  = 0.45, 58% isolated yield); mp: 102–104 °C;  $[\alpha]_D^{20}$  = -34 (c 1.0, CH<sub>2</sub>Cl<sub>2</sub>); <sup>1</sup>H NMR (400 MHz, CDCl<sub>3</sub>) δ 7.41 (d,  $J$  = 8.4 Hz, 2H), 7.07 (d,  $J$  = 8.0 Hz, 2H), 6.94 (d,  $J$  = 8.0 Hz, 2H), 6.83 (d,  $J$  = 8.0 Hz, 2H), 5.54 (d,  $J$  = 10.8 Hz, 1H), 5.00 (d,  $J$  = 6.8 Hz, 1H), 4.66 (d,  $J$  = 1.6 Hz, 1H), 4.51–4.47 (m, 2H), 4.45–4.39 (m, 2H), 4.18–4.13 (m, 1H), 3.35 (dd,  $J$  = 13.2, 10.8 Hz, 1H), 3.15 (s, 3H), 2.29 (s, 3H), 2.24 (s, 3H), 1.86 (d,  $J$  = 13.6 Hz, 1H), 1.42 (t,  $J$  = 7.2 Hz, 3H), 1.40 (s, 3H), 1.37 (t,  $J$  = 7.2 Hz, 3H), 1.28 (s, 3H); <sup>13</sup>C NMR (100 MHz, CDCl<sub>3</sub>) δ 167.6, 165.7, 142.8, 138.7, 137.8, 136.2, 128.8, 128.2, 128.2, 127.8, 114.5, 109.0, 98.0, 85.2, 83.5, 80.5, 63.8, 62.9, 62.4, 56.7, 42.9, 26.2, 24.9, 21.5, 21.1, 14.1; HRMS calcd for C<sub>31</sub>H<sub>40</sub>NO<sub>11</sub>S [M+H]<sup>+</sup>: 634.2317, found for: 634.2321.

**(2R,3R,4S,5R,8R)-diethyl 8-(4-methoxyphenyl)-3,4-O-isopropylidene-2-methoxy-7-tosyl-1-oxa-7-azaspiro[4.4]nonane-6,6-dicarboxylate ((8S)-3ia)**

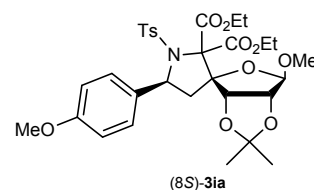

White solid (petroleum ether/EtOAc = 4:1,  $R_f$  = 0.37, 41% isolated yield); mp: 120–122 °C;  $[\alpha]_D^{20}$  = -37 (c 1.0, CH<sub>2</sub>Cl<sub>2</sub>); <sup>1</sup>H NMR (400 MHz, CDCl<sub>3</sub>) δ 7.23 (d,  $J$  = 8.4 Hz, 2H), 6.95 (dd,  $J$  = 17.2, 8.0 Hz, 4H), 6.77 (d,  $J$  = 8.0 Hz, 2H), 5.07 (d,  $J$  = 6.4 Hz, 1H), 4.99 (t,  $J$  = 7.6 Hz, 1H), 4.94 (d,  $J$  = 1.2 Hz, 1H), 4.56 (dd,  $J$  = 6.8, 1.6 Hz, 1H), 4.51–4.22 (m, 2H), 4.41–4.26 (m, 2H), 3.41 (s, 3H), 2.78 (dd,  $J$  = 13.2, 8.4 Hz, 1H), 2.32 (s, 3H), 2.31–2.28 (m, 1H), 2.24 (s, 3H), 1.42 (t,  $J$  = 7.2 Hz, 3H), 1.40 (t,  $J$  = 7.2 Hz, 3H), 1.35 (s, 3H), 1.24 (s, 3H); <sup>13</sup>C NMR (100 MHz, CDCl<sub>3</sub>) δ 167.8, 165.5, 142.2, 139.0, 137.5, 134.3, 129.0, 128.4, 128.3, 127.9, 113.3, 109.6, 95.6, 85.4, 81.2, 81.1, 62.6, 62.6, 62.3, 56.9, 43.0, 26.2, 24.8, 21.5, 21.2, 14.1, 14.0; HRMS calcd for C<sub>31</sub>H<sub>40</sub>NO<sub>11</sub>S [M+H]<sup>+</sup>: 634.2317, found for: 634.2318.

**(2R,3R,4S,5R,8R)-diethyl 8-(2-chlorophenyl)-3,4-O-isopropylidene-2-methoxy-**

### 7-tosyl-1-oxa-7-azaspiro[4.4]nonane-6,6-dicarboxylate ((8*R*)-3ja)

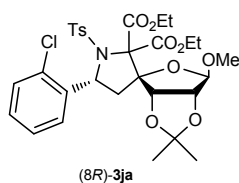

White solid (petroleum ether/EtOAc = 4:1,  $R_f$  = 0.45, 34% isolated yield); mp:169–171 °C;  $[\alpha]_D^{20}$  = -8 (c 1.0, CH<sub>2</sub>Cl<sub>2</sub>); <sup>1</sup>H NMR (400 MHz, CDCl<sub>3</sub>)  $\delta$  7.57 (d,  $J$  = 8.0 Hz, 2H), 7.21 (dd,  $J$  = 7.6, 0.8 Hz, 1H), 7.14 (dd,  $J$  = 8.0, 1.2 Hz, 1H), 7.00 (d,  $J$  = 8.0 Hz, 2H), 6.95 (td,  $J$  = 7.6, 1.6 Hz, 1H), 6.60 (td,  $J$  = 8.0, 0.8 Hz, 1H), 5.86 (d,  $J$  = 10.0 Hz, 1H), 4.98 (d,  $J$  = 6.8 Hz, 1H), 4.56–4.50 (m, 2H), 4.48–4.41 (m, 3H), 4.21–4.13 (m, 1H), 3.35 (dd,  $J$  = 13.6, 10.0 Hz, 1H), 3.01 (s, 3H), 2.29 (s, 3H), 1.90 (d,  $J$  = 13.6 Hz, 1H), 1.43 (d,  $J$  = 7.2 Hz, 1H), 1.42 (d,  $J$  = 7.2 Hz, 1H), 1.40 (t,  $J$  = 7.2 Hz, 3H), 1.28 (s, 3H); <sup>13</sup>C NMR (100 MHz, CDCl<sub>3</sub>)  $\delta$  167.2, 166.1, 143.3, 138.5, 137.0, 131.6, 130.4, 128.9, 128.5, 128.5, 127.7, 125.2, 114.6, 108.9, 98.0, 85.1, 83.6, 80.4, 63.0, 62.6, 61.1, 56.5, 41.8, 26.2, 24.8, 21.6, 14.1, 14.1; HRMS calcd for C<sub>30</sub>H<sub>37</sub>ClNO<sub>10</sub>S [M+H]<sup>+</sup>: 638.1822, found for: 638.1823.

### (2*R*,3*R*,4*S*,5*R*,8*R*)-diethyl 8-(2-chlorophenyl)-3,4-*O*-isopropylidene-2-methoxy-7-tosyl-1-oxa-7-azaspiro[4.4]nonane-6,6-dicarboxylate ((8*S*)-3ja)

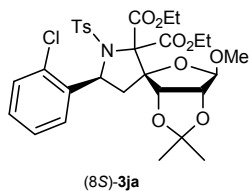

White solid (petroleum ether/EtOAc = 4:1,  $R_f$  = 0.39, 61% isolated yield); mp:100–102 °C;  $[\alpha]_D^{20}$  = -80 (c 1.0, CH<sub>2</sub>Cl<sub>2</sub>); <sup>1</sup>H NMR (400 MHz, CDCl<sub>3</sub>)  $\delta$  7.57 (d,  $J$  = 8.0 Hz, 2H), 7.22 (d,  $J$  = 8.0 Hz, 1H), 7.05 (d,  $J$  = 8.0 Hz, 2H), 7.00 (t,  $J$  = 7.8 Hz, 2H), 6.70 (t,  $J$  = 7.6 Hz, 1H), 5.66 (d,  $J$  = 7.2 Hz, 1H), 4.86 (s, 1H), 4.62–4.50 (m, 1H), 4.50–4.40 (m, 3H), 4.38–4.23 (m, 2H), 3.35 (s, 3H), 2.99 (dd,  $J$  = 12.4, 9.6 Hz, 1H), 2.75 (dd,  $J$  = 12.8, 2.4 Hz, 1H), 2.32 (s, 3H), 1.43 (t,  $J$  = 7.2, 3H), 1.42 (t,  $J$  = 7.2, 3H), 1.19 (s, 3H), 0.90 (s, 3H); <sup>13</sup>C NMR (100 MHz, CDCl<sub>3</sub>)  $\delta$  167.9, 165.8, 143.3, 137.6, 137.5, 132.2, 129.1, 128.7, 128.7, 128.0, 125.6, 112.6, 110.7, 97.1, 86.0, 82.1, 81.3, 62.6, 62.6, 56.4, 40.5, 26.2, 24.5, 21.6, 14.1, 14.0; HRMS calcd for C<sub>30</sub>H<sub>37</sub>ClNO<sub>10</sub>S [M+H]<sup>+</sup>: 638.1822, found for: 638.1828.

### (2*R*,3*R*,4*S*,5*R*,8*R*)-diethyl 8-(3-chlorophenyl)-3,4-*O*-isopropylidene-2-methoxy-7-tosyl-1-oxa-7-azaspiro[4.4]nonane-6,6-dicarboxylate ((8*R*)-3ka)

White solid (petroleum ether/EtOAc = 4:1,  $R_f$  = 0.45, 75% isolated yield); mp:168–170 °C;  $[\alpha]_D^{20}$  = -8 (c 1.0, CH<sub>2</sub>Cl<sub>2</sub>); <sup>1</sup>H NMR (400 MHz, CDCl<sub>3</sub>)  $\delta$  7.57 (d,  $J$  = 8.4 Hz,

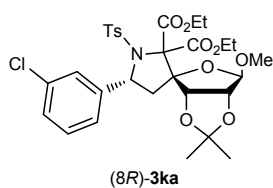

2H), 7.21 (dd,  $J = 8.0, 0.8$  Hz, 1H), 7.15 (dd,  $J = 8.0, 1.2$  Hz, 1H), 7.00 (d,  $J = 8.0$  Hz, 2H), 6.95 (td,  $J = 7.6, 1.6$  Hz, 1H), 6.63–6.59 (m, 1H), 5.86 (d,  $J = 10.0$  Hz, 1H), 4.98 (d,  $J = 6.8$  Hz, 1H), 4.56–4.41 (m, 5H), 4.21–4.15 (m, 1H), 3.35 (dd,  $J = 13.6, 10.0$  Hz, 1H), 3.01 (s, 3H), 2.29 (s, 3H), 1.90 (d,  $J = 14.0$  Hz, 1H), 1.44 (s, 3H), 1.43 (t,  $J = 7.2$  Hz, 3H), 1.40 (t,  $J = 7.2$  Hz, 3H), 1.28 (s, 3H);  $^{13}\text{C}$  NMR (100 MHz,  $\text{CDCl}_3$ )  $\delta$  167.2, 166.1, 143.3, 138.5, 137.1, 131.6, 130.4, 128.9, 128.6, 128.5, 127.7, 125.2, 114.6, 109.0, 98.1, 85.1, 83.6, 80.4, 63.0, 62.6, 61.1, 56.5, 41.9, 26.2, 24.8, 21.6, 14.1, 14.1; HRMS calcd for  $\text{C}_{30}\text{H}_{37}\text{ClNO}_{10}\text{S}$   $[\text{M}+\text{H}]^+$ : 638.1822, found for: 638.1825.

**(2R,3R,4S,5R,8R)-diethyl 8-(3-chlorophenyl)-3,4-O-isopropylidene-2-methoxy-7-tosyl-1-oxa-7-azaspiro[4.4]nonane-6,6-dicarboxylate ((8S)-3ka)**

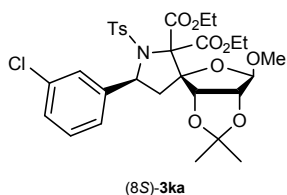

White solid (petroleum ether/EtOAc = 4:1,  $R_f = 0.37$ , 24% isolated yield); mp:122–124 °C;  $[\alpha]_{\text{D}}^{20} = -71$  (c 1.0,  $\text{CH}_2\text{Cl}_2$ );  $^1\text{H}$  NMR (400 MHz,  $\text{CDCl}_3$ )  $\delta$  7.57 (d,  $J = 8.4$  Hz, 2H), 7.23 (d,  $J = 7.6$  Hz, 1H), 7.06 (d,  $J = 8.0$  Hz, 2H), 7.02–6.97 (m, 2H), 6.70 (t,  $J = 7.2$  Hz, 1H), 5.66 (dd,  $J = 9.2, 2.0$  Hz, 1H), 4.86 (d,  $J = 1.6$  Hz, 1H), 4.60–4.56 (m, 1H), 4.50–4.39 (m, 3H), 4.38–4.25 (m, 2H), 3.35 (s, 3H), 3.02–2.96 (m, 1H), 2.75 (dd,  $J = 12.8, 2.4$  Hz, 1H), 2.33 (s, 3H), 1.43 (t,  $J = 7.2$ , 3H), 1.42 (t,  $J = 7.2$ , 3H), 1.19 (s, 3H), 0.90 (s, 3H);  $^{13}\text{C}$  NMR (100 MHz,  $\text{CDCl}_3$ )  $\delta$  167.9, 165.8, 143.4, 137.6, 137.5, 132.3, 129.1, 128.8, 128.7, 128.0, 125.6, 112.6, 110.7, 97.1, 86.1, 82.1, 81.3, 62.6, 62.6, 59.1, 56.5, 40.5, 26.2, 24.5, 21.6, 14.2, 14.0; HRMS calcd for  $\text{C}_{30}\text{H}_{37}\text{ClNO}_{10}\text{S}$   $[\text{M}+\text{H}]^+$ : 638.1822, found for: 638.1828.

**(2R,3R,4S,5R,8R)-diethyl 8-(2-methylphenyl)-3,4-O-isopropylidene-2-methoxy-7-tosyl-1-oxa-7-azaspiro[4.4]nonane-6,6-dicarboxylate ((8R)-3la)**

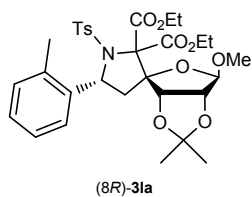

White solid (petroleum ether/EtOAc = 4:1,  $R_f = 0.46$ , 58% isolated yield); mp:165–168 °C;  $[\alpha]_{\text{D}}^{20} = -7$  (c 1.0,  $\text{CH}_2\text{Cl}_2$ );  $^1\text{H}$  NMR (400 MHz,  $\text{CDCl}_3$ )  $\delta$  7.44 (d,  $J = 8.2$  Hz, 2H), 7.12 (d,  $J = 7.6$  Hz, 1H), 7.02 (d,  $J = 7.2$  Hz, 1H), 6.96–6.90 (m, 3H), 6.57 (t,  $J = 7.4$  Hz, 1H), 5.77 (d,  $J = 10.4$  Hz, 1H), 5.00 (d,  $J = 6.8$  Hz, 1H), 4.59 (d,  $J = 1.6$



Hz, 1H), 4.56–4.41 (m, 4H), 4.21–4.13 (m, 1H), 3.34 (dd,  $J = 12.8, 10.8$  Hz, 1H), 3.09 (s, 3H), 2.36 (s, 3H), 2.28 (s, 3H), 1.78 (d,  $J = 13.2$  Hz, 1H), 1.43 (t,  $J = 7.2$  Hz, 3H), 1.41 (s, 3H), 1.39 (t,  $J = 7.2$  Hz, 3H), 1.28 (s, 3H);  $^{13}\text{C}$  NMR (100 MHz,  $\text{CDCl}_3$ )  $\delta$  167.6, 165.8, 142.9, 139.1, 137.4, 133.8, 129.4, 128.8, 128.7, 128.2, 126.3, 124.8, 114.4, 109.0, 98.2, 85.1, 83.5, 80.6, 62.8, 62.4, 60.6, 56.5, 41.5, 26.2, 24.8, 21.5, 19.6, 14.1; HRMS calcd for  $\text{C}_{30}\text{H}_{40}\text{NO}_{10}\text{S}$   $[\text{M}+\text{H}]^+$ : 618.2367, found for: 618.2366.

**(2*R*,3*R*,4*S*,5*R*,8*R*)-diethyl 8-(2-methylphenyl)-3,4-O-isopropylidene-2-methoxy-7-tosyl-1-oxa-7-azaspiro[4.4]nonane-6,6-dicarboxylate ((8*S*)-3la)**

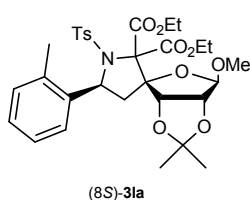

White solid (petroleum ether/EtOAc = 4:1,  $R_f = 0.28$ , 39% isolated yield); mp: 110–112 °C;  $[\alpha]_{\text{D}}^{20} = -26$  (c 1.0,  $\text{CH}_2\text{Cl}_2$ );  $^1\text{H}$  NMR (400 MHz,  $\text{CDCl}_3$ )  $\delta$  7.29 (d,  $J = 8.0$  Hz, 2H), 7.02 (d,  $J = 7.6$  Hz, 1H), 6.95 (d,  $J = 8.0$  Hz, 3H), 6.84 (d,  $J = 7.6$  Hz, 1H), 6.54 (t,  $J = 7.4$  Hz, 1H), 5.46 (t,  $J = 6.8$  Hz, 1H), 4.91 (d,  $J = 1.6$  Hz, 1H), 4.86 (d,  $J = 6.4$  Hz, 1H), 4.57–4.51 (m, 2H), 4.49–4.43 (m, 1H), 4.37–4.28 (m, 2H), 3.40 (s, 3H), 2.69–2.55 (m, 2H), 2.36 (s, 3H), 2.30 (s, 3H), 1.42 (t,  $J = 7.2$  Hz, 3H), 1.42 (t,  $J = 7.2$  Hz, 3H), 1.26 (s, 3H), 1.09 (s, 3H);  $^{13}\text{C}$  NMR (100 MHz,  $\text{CDCl}_3$ )  $\delta$  167.8, 165.8, 142.6, 138.4, 136.4, 135.7, 129.9, 128.5, 128.2, 127.9, 126.9, 125.1, 112.9, 110.2, 96.3, 85.6, 81.6, 81.2, 62.5, 62.4, 58.4, 56.7, 41.7, 26.2, 24.6, 21.5, 19.7, 14.2, 14.0; HRMS calcd for  $\text{C}_{30}\text{H}_{40}\text{NO}_{10}\text{S}$   $[\text{M}+\text{H}]^+$ : 618.2367, found for: 618.2367.

**(2*R*,3*R*,4*S*,5*R*,8*R*)-diethyl 8-(3-methylphenyl)-3,4-O-isopropylidene-2-methoxy-7-tosyl-1-oxa-7-azaspiro[4.4]nonane-6,6-dicarboxylate ((8*R*)-3ma)**

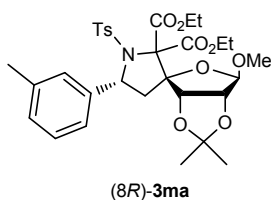

White solid (petroleum ether/EtOAc = 4:1,  $R_f = 0.46$ , 65% isolated yield); mp: 167–169 °C;  $[\alpha]_{\text{D}}^{20} = -13$  (c 1.0,  $\text{CH}_2\text{Cl}_2$ );  $^1\text{H}$  NMR (400 MHz,  $\text{CDCl}_3$ )  $\delta$  7.45 (d,  $J = 8.4$  Hz, 2H), 6.96–6.92 (m, 5H), 6.85 (d,  $J = 6.4$  Hz, 1H), 5.57 (d,  $J = 10.8$  Hz, 1H), 5.00 (d,  $J = 7.2$  Hz, 1H), 4.65 (s, 1H), 4.54–4.48 (m, 2H), 4.46–4.39 (m, 2H), 4.20–4.12 (m, 1H), 3.33 (dd,  $J = 13.6, 10.8$  Hz, 1H), 3.13 (s, 3H), 2.28 (s, 3H), 2.03 (s, 3H), 1.88 (d,  $J = 14.0$  Hz, 1H), 1.43 (t,  $J = 7.2$  Hz, 1H), 1.41 (s, 3H), 1.38 (t,  $J = 7.2$  Hz, 3H), 1.28 (s, 3H);  $^{13}\text{C}$  NMR (100 MHz,  $\text{CDCl}_3$ )  $\delta$  167.6, 165.7, 142.8, 141.4, 137.6, 137.0, 128.8, 128.7, 128.1, 127.5, 127.2, 124.6, 114.4, 109.0, 98.1, 85.2, 83.5,

80.5, 63.8, 62.9, 62.4, 56.5, 42.9, 26.2, 24.8, 21.5, 21.2, 14.1; HRMS calcd for  $C_{30}H_{40}NO_{10}S$   $[M+H]^+$ : 618.2367, found for: 618.2371.

**(2*R*,3*R*,4*S*,5*R*,8*R*)-diethyl 8-(3-methylphenyl)-3,4-O-isopropylidene-2-methoxy-7-tosyl-1-oxa-7-azaspiro[4.4]nonane-6,6-dicarboxylate ((8*S*)-3ma)**

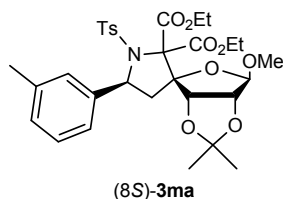

(8*S*)-3ma

White solid (petroleum ether/EtOAc = 4:1,  $R_f$  = 0.36, 34% isolated yield); mp: 120–123 °C;  $[\alpha]_D^{20}$  = -55 (c 1.0,  $CH_2Cl_2$ );  $^1H$  NMR (400 MHz,  $CDCl_3$ )  $\delta$  7.24 (d,  $J$  = 8.4 Hz, 2H), 6.94 (dd,  $J$  = 10.4, 6.0 Hz, 4H), 6.88 (d,  $J$  = 6.4 Hz, 1H), 6.77 (s, 1H), 5.11 (d,  $J$  = 6.4 Hz, 1H), 5.03 (t,  $J$  = 7.6 Hz, 1H), 4.93 (d,  $J$  = 1.6 Hz, 1H), 4.56 (dd,  $J$  = 6.4, 1.6 Hz, 1H), 4.51–4.42 (m, 2H), 4.39–4.29 (m, 2H), 3.42 (s, 3H), 2.75 (dd,  $J$  = 13.2, 7.6 Hz, 1H), 2.35 (dd,  $J$  = 13.2, 7.6 Hz, 1H), 2.31 (s, 3H), 2.01 (s, 3H), 1.42 (t,  $J$  = 7.2 Hz, 3H), 1.42 (t,  $J$  = 7.2 Hz, 3H), 1.34 (s, 3H), 1.23 (s, 3H);  $^{13}C$  NMR (100 MHz,  $CDCl_3$ )  $\delta$  167.6, 165.6, 142.2, 139.0, 137.1, 129.4, 128.3, 127.8, 127.6, 126.6, 113.1, 109.9, 95.4, 85.3, 81.2, 80.9, 62.5, 62.5, 62.3, 56.8, 42.4, 26.2, 24.8, 21.4, 21.0, 14.1, 14.0; HRMS calcd for  $C_{30}H_{40}NO_{10}S$   $[M+H]^+$ : 618.2367, found for: 618.2371.

**(2*R*,3*R*,4*S*,5*R*,8*R*)-diethyl 8-(naphthalen-1-yl)-3,4-O-isopropylidene-2-methoxy-7-tosyl-1-oxa-7-azaspiro[4.4]nonane-6,6-dicarboxylate ((8*R*)-3na)**

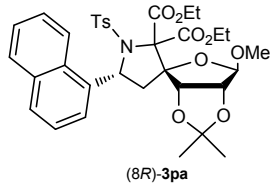

(8*R*)-3na

White solid (petroleum ether/EtOAc = 4:1,  $R_f$  = 0.42, 63% isolated yield); mp: 150–152 °C;  $[\alpha]_D^{20}$  = -8 (c 1.0,  $CH_2Cl_2$ );  $^1H$  NMR (400 MHz,  $CDCl_3$ )  $\delta$  7.96 (d,  $J$  = 8.4 Hz, 1H), 7.84 (d,  $J$  = 7.6 Hz, 1H), 7.58–7.53 (m, 2H), 7.51–7.47 (m, 3H), 7.27 (d,  $J$  = 7.6 Hz, 1H), 6.93 (d,  $J$  = 8.0 Hz, 2H), 6.84 (t,  $J$  = 7.8 Hz, 1H), 6.36 (d,  $J$  = 10.0 Hz, 1H), 5.00 (d,  $J$  = 6.8 Hz, 1H), 4.60–4.52 (m, 1H), 4.51 - 4.44 (m, 3H), 4.39 (d,  $J$  = 2.4 Hz, 1H), 4.23 - 4.15 (m, 1H), 3.53 (dd,  $J$  = 13.6, 10.4 Hz, 1H), 2.97 (s, 3H), 2.28 (s, 3H), 2.01 (d,  $J$  = 13.6 Hz, 1H), 1.47 (t,  $J$  = 7.2 Hz, 3H), 1.41 (t,  $J$  = 7.0 Hz, 3H), 1.37 (s, 3H), 1.26 (s, 3H);  $^{13}C$  NMR (100 MHz,  $CDCl_3$ )  $\delta$  167.6, 166.2, 143.2, 137.4, 135.6, 133.5, 130.1, 129.0, 129.0, 128.4, 126.9, 126.4, 126.0, 125.1, 124.6, 122.9, 114.5, 109.0, 98.0, 85.0, 83.7, 80.6, 63.0, 62.6, 60.9, 56.5, 42.1, 26.2, 24.8, 21.5, 14.1, 14.1; HRMS calcd for  $C_{34}H_{40}NO_{10}S$   $[M+H]^+$ : 654.2367, found for: 654.2368.

**(2*R*,3*R*,4*S*,5*R*,8*R*)-diethyl 8-(naphthalen-1-yl)-3,4-*O*-isopropylidene-2-methoxy-7-tosyl-1-oxa-7-azaspiro[4.4]nonane-6,6-dicarboxylate ((8*S*)-3na)**

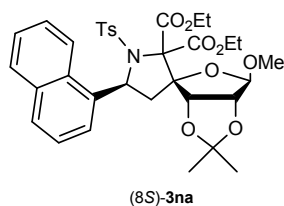

White solid (petroleum ether/EtOAc = 4:1,  $R_f$  = 0.36, 22% isolated yield); mp: 168–170 °C;  $[\alpha]_D^{20}$  = -46 (c 1.0, CH<sub>2</sub>Cl<sub>2</sub>); <sup>1</sup>H NMR (400 MHz, CDCl<sub>3</sub>) δ 7.94 (d,  $J$  = 8.4 Hz, 1H), 7.80 (d,  $J$  = 8.0 Hz, 1H), 7.56–7.45 (m, 5H), 7.06 (d,  $J$  = 7.2 Hz, 1H), 6.97 (d,  $J$  = 8.0 Hz, 2H), 6.85 (t,  $J$  = 7.6 Hz, 1H), 6.18 (d,  $J$  = 8.8 Hz, 1H), 4.81 (s, 1H), 4.66–4.58 (m, 1H), 4.53–4.37 (m, 4H), 4.31–4.23 (m, 1H), 3.36 (s, 3H), 3.20 (dd,  $J$  = 12.0, 9.6 Hz, 1H), 2.84 (d,  $J$  = 12.0 Hz, 1H), 2.30 (s, 3H), 1.47 (t,  $J$  = 7.2, 3H), 1.44 (t,  $J$  = 7.2, 3H), 0.85 (s, 3H), 0.73 (s, 3H); <sup>13</sup>C NMR (400 MHz, CDCl<sub>3</sub>) δ 168.0, 166.3, 143.2, 137.7, 135.1, 133.7, 130.8, 128.8, 128.7, 128.5, 127.3, 125.9, 125.2, 124.7, 124.4, 123.2, 112.3, 110.9, 97.3, 86.0, 82.4, 81.4, 62.6, 62.5, 58.6, 56.4, 41.1, 29.8, 25.9, 24.3, 21.6, 14.2, 14.1; HRMS calcd for C<sub>34</sub>H<sub>40</sub>NO<sub>10</sub>S [M+H]<sup>+</sup>: 654.2367, found for: 654.2369.

**(2*R*,3*R*,4*S*,5*R*,8*R*)-diethyl 8-(4-chlorophenyl)-3,4-*O*-isopropylidene-2-methoxy-7-methylsulfonyl-1-oxa-7-azaspiro[4.4]nonane-6,6-dicarboxylate ((8*R*)-3oa)**

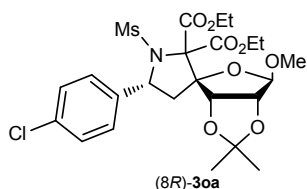

White solid (petroleum ether/EtOAc = 4:1,  $R_f$  = 0.45, 50% isolated yield); mp: 138–142 °C;  $[\alpha]_D^{20}$  = -32 (c 1.0, CH<sub>2</sub>Cl<sub>2</sub>); <sup>1</sup>H NMR (400 MHz, CDCl<sub>3</sub>) δ 7.51 (d,  $J$  = 8.4 Hz, 2H), 7.30 (d,  $J$  = 8.4 Hz, 2H), 5.47 (d,  $J$  = 10.8 Hz, 1H), 5.01 (d,  $J$  = 6.8 Hz, 1H), 4.81 (d,  $J$  = 1.2 Hz, 1H), 4.55 (dd,  $J$  = 6.8, 1.2 Hz, 1H), 4.53–4.45 (m, 1H), 4.38–4.32 (m, 2H), 4.23–4.15 (m, 1H), 3.32 (s, 3H), 3.30–3.27 (m, 1H), 2.94 (s, 3H), 1.83 (d,  $J$  = 14.0 Hz, 1H), 1.42 (s, 3H), 1.39 (t,  $J$  = 6.8 Hz, 3H), 1.37 (t,  $J$  = 6.6 Hz, 3H), 1.29 (s, 3H); <sup>13</sup>C NMR (100 MHz, CDCl<sub>3</sub>) δ 167.4, 166.2, 140.5, 133.4, 129.5, 128.5, 114.4, 109.3, 98.4, 85.4, 83.4, 80.2, 63.1, 63.0, 62.8, 56.7, 43.6, 42.5, 26.2, 24.8, 14.0; HRMS calcd for C<sub>24</sub>H<sub>33</sub>ClNO<sub>10</sub>S [M+H]<sup>+</sup>: 562.1508, found for: 562.1508.

**(2*R*,3*R*,4*S*,5*R*,8*R*)-diethyl 8-(4-chlorophenyl)-3,4-*O*-isopropylidene-2-methoxy-7-methylsulfonyl-1-oxa-7-azaspiro[4.4]nonane-6,6-dicarboxylate ((8*S*)-3oa)**

White solid (petroleum ether/EtOAc = 4:1,  $R_f$  = 0.38, 45% isolated yield); mp: 110–

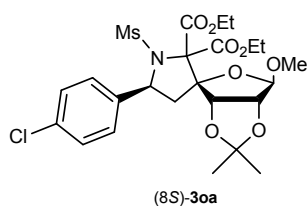

112 °C;  $[\alpha]_{\text{D}}^{20} = -58$  (c 1.0,  $\text{CH}_2\text{Cl}_2$ );  $^1\text{H}$  NMR (400 MHz,  $\text{CDCl}_3$ )  $\delta$  7.34 (dd,  $J = 8.4, 6.0$  Hz, 4H), 5.16 (dd,  $J = 8.4, 6.0$  Hz, 1H), 4.94 (d,  $J = 24.4, 8.4$  Hz, 4H), 4.86 (d,  $J = 6.4$  Hz, 1H), 4.56 (dd,  $J = 6.4, 1.6$  Hz, 1H), 4.52–4.18 (m, 4H), 3.37 (s, 3H), 2.97 (s, 3H), 2.79–2.62 (m, 2H), 1.40 (t,  $J = 7.2$  Hz, 3H), 1.36 (t,  $J = 7.2$  Hz, 3H), 1.34 (s, 3H), 1.22 (s, 3H);  $^{13}\text{C}$  NMR (100 MHz,  $\text{CDCl}_3$ )  $\delta$  167.9, 165.6, 139.1, 133.7, 129.2, 128.5, 113.4, 110.1, 96.7, 86.1, 81.5, 81.4, 62.8, 62.6, 62.0, 56.6, 42.8, 42.6, 26.2, 24.8, 14.1, 14.0; HRMS calcd for  $\text{C}_{24}\text{H}_{33}\text{ClNO}_{10}\text{S}$   $[\text{M}+\text{H}]^+$ : 562.1508, found for: 562.1508.

**(2R,3R,4S,5R,8R)-dimethyl 8-(4-chlorophenyl)-3,4-O-isopropylidene-2-methoxy-7-tosyl-1-oxa-7-azaspiro[4.4]nonane-6,6-dicarboxylate ((8R)-3pa)**

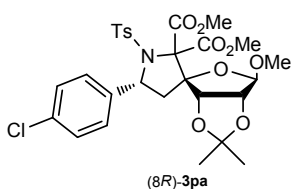

White solid (petroleum ether/EtOAc = 4:1,  $R_f = 0.33$ , 52% isolated yield); mp: 118–120 °C;  $[\alpha]_{\text{D}}^{20} = -43$  (c 1.0,  $\text{CH}_2\text{Cl}_2$ );  $^1\text{H}$  NMR (400 MHz,  $\text{CDCl}_3$ )  $\delta$  7.47 (d,  $J = 8.4$  Hz, 2H), 7.08 (d,  $J = 8.4$  Hz, 2H), 6.99 (dd,  $J = 14.4, 8.0$  Hz, 4H), 5.55 (d,  $J = 10.4$  Hz, 1H), 4.94 (d,  $J = 6.8$  Hz, 1H), 4.65 (d,  $J = 1.6$  Hz, 1H), 4.49 (dd,  $J = 6.8, 2.0$  Hz, 1H), 3.96 (s, 3H), 3.87 (s, 3H), 3.33 (dd,  $J = 13.6, 10.8$  Hz, 1H), 3.14 (s, 3H), 2.32 (s, 3H), 1.84 (d,  $J = 13.6$  Hz, 1H), 1.41 (s, 3H), 1.28 (s, 3H);  $^{13}\text{C}$  NMR (100 MHz,  $\text{CDCl}_3$ )  $\delta$  168.1, 166.2, 143.5, 140.1, 137.2, 132.4, 129.1, 128.8, 128.4, 127.6, 114.4, 109.4, 98.5, 85.3, 83.7, 80.5, 63.1, 56.6, 53.8, 53.2, 43.1, 26.2, 24.8, 21.5; HRMS calcd for  $\text{C}_{28}\text{H}_{33}\text{ClNO}_{10}\text{S}$   $[\text{M}+\text{H}]^+$ : 610.1508, found for: 610.1509.

**(2R,3R,4S,5R,8R)-Dimethyl 8-(4-chlorophenyl)-3,4-O-isopropylidene-2-methoxy-7-tosyl-1-oxa-7-azaspiro[4.4]nonane-6,6-dicarboxylate ((8S)-3pa)**

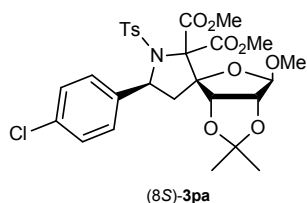

White solid (petroleum ether/EtOAc = 4:1,  $R_f = 0.26$ , 47% isolated yield); mp: 144–146 °C;  $[\alpha]_{\text{D}}^{20} = -25$  (c 1.0,  $\text{CH}_2\text{Cl}_2$ );  $^1\text{H}$  NMR (400 MHz,  $\text{CDCl}_3$ )  $\delta$  7.26 (d,  $J = 6.8$  Hz, 2H), 7.01–6.99 (m, 4H), 6.93 (d,  $J = 8.4$  Hz, 2H), 5.03 (t,  $J = 6.4$  Hz, 2H), 4.93 (d,  $J = 1.2$  Hz, 1H), 4.55 (dd,  $J = 6.4, 1.2$  Hz, 1H), 3.95 (s, 3H), 3.92 (s, 3H), 3.41 (s, 3H), 2.72 (dd,  $J = 13.2, 7.2$  Hz, 1H), 2.39 (dd,  $J = 13.2, 8.0$  Hz, 1H), 2.35 (s, 3H), 1.34 (s, 3H), 1.22 (s, 3H);  $^{13}\text{C}$  NMR (100 MHz,  $\text{CDCl}_3$ )  $\delta$  168.3,

166.2, 143.0, 138.6, 136.2, 133.6, 130.2, 128.7, 127.9, 127.8, 113.3, 110.0, 95.8, 85.5, 81.2, 81.2, 61.8, 56.9, 53.4, 53.2, 42.4, 26.2, 24.9, 21.6; HRMS calcd for  $C_{28}H_{33}ClNO_{10}S$   $[M+H]^+$ : 610.1508, found for: 610.1508.

**(3*S*,5*R*,7*S*,8*R*,9*S*,10*R*)-diethyl 7,8:9,10-di-*O*-isopropylidene-3-(4-chlorophenyl)-2-tosyl-6-oxa-2-azaspiro[4.5]decane-1,1-dicarboxylate ((5*R*)-5ab)**

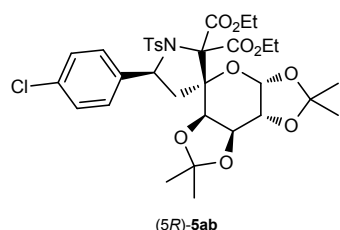

White solid (petroleum ether/EtOAc = 4:1,  $R_f$  = 0.35, 20% isolated yield); mp: 186–190 °C;  $[\alpha]_D^{20}$  = -61 (c 1.0, CH<sub>2</sub>Cl<sub>2</sub>); <sup>1</sup>H NMR (400 MHz, CDCl<sub>3</sub>) δ 7.43 (d,  $J$  = 8.4 Hz, 2H), 7.13 (d,  $J$  = 8.4 Hz, 2H), 7.00 (dd,  $J$  = 11.8, 8.6 Hz, 4H), 5.59 (d,  $J$  = 10.0 Hz, 1H), 4.92 (d,  $J$  = 6.8 Hz, 1H), 4.60–4.50 (m, 2H), 4.41–4.26 (m, 3H), 4.19–4.11 (m, 1H), 4.00 (d,  $J$  = 2.4 Hz, 1H), 3.22 (dd,  $J$  = 14.0, 10.4 Hz, 1H), 2.32 (s, 3H), 1.99 (d,  $J$  = 14.4 Hz, 1H), 1.44 (s, 3H), 1.42 (t,  $J$  = 7.2 Hz, 3H), 1.37 (d,  $J$  = 7.2 Hz, 3H), 1.33 (s, 3H), 1.31 (s, 3H), 1.20 (s, 3H); <sup>13</sup>C NMR (100 MHz, CDCl<sub>3</sub>) δ 166.1, 165.3, 143.3, 139.4, 137.9, 132.8, 129.2, 128.9, 128.5, 128.1, 110.8, 109.1, 93.5, 89.3, 83.8, 75.7, 75.1, 68.5, 62.9, 62.9, 62.4, 34.5, 27.7, 26.2, 26.0, 25.3, 21.7, 14.3, 14.1. HRMS calcd for  $C_{33}H_{41}ClNO_{11}S$   $[M+H]^+$ : 694.2083, found for: 694.2093.

**(3*S*,5*R*,7*S*,8*R*,9*S*,10*R*)-diethyl 7,8:9,10-di-*O*-isopropylidene-3-(4-chlorophenyl)-2-tosyl-6-oxa-2-azaspiro[4.5]decane-1,1-dicarboxylate ((5*S*)-5ab)**

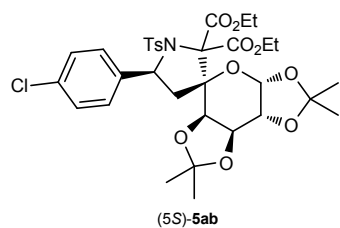

White solid (petroleum ether/EtOAc = 4:1,  $R_f$  = 0.24, 64% isolated yield); mp: 180–182 °C;  $[\alpha]_D^{20}$  = -16 (c 1.0, CH<sub>2</sub>Cl<sub>2</sub>); <sup>1</sup>H NMR (400 MHz, CDCl<sub>3</sub>) δ 7.21 (d,  $J$  = 8.0 Hz, 2H), 7.01 (dd,  $J$  = 21.2, 8.4 Hz, 4H), 6.90 (d,  $J$  = 8.0 Hz, 2H), 5.56 (d,  $J$  = 3.2 Hz, 1H), 5.16 (t,  $J$  = 7.4 Hz, 1H), 4.51–4.39 (m, 3H), 4.37–4.25 (m, 2H), 4.23 (d,  $J$  = 5.2 Hz, 1H), 3.88 (d,  $J$  = 3.2 Hz, 1H), 2.84 (dd,  $J$  = 12.8, 6.8 Hz, 1H), 2.35 (s, 3H), 2.20 (dd,  $J$  = 12.8, 8.4 Hz, 1H), 1.42 (t,  $J$  = 7.2 Hz, 3H), 1.41(s, 3H), 1.40(s, 3H), 1.39 (t,  $J$  = 7.2 Hz, 3H), 1.29 (s, 3H), 1.28 (s, 3H); <sup>13</sup>C NMR (100 MHz, CDCl<sub>3</sub>) δ 168.3, 165.6, 143.0, 138.7, 135.5, 133.8, 130.0, 128.7, 128.1, 127.9, 109.7, 109.7, 95.9, 84.5, 82.7, 73.5, 72.3, 62.5, 62.1, 62.0, 46.4, 27.4, 26.9, 25.4, 25.3, 21.5, 14.2, 14.0. HRMS calcd for  $C_{33}H_{41}ClNO_{11}S$   $[M+H]^+$ : 694.2083,

found for: 694.2083.

**(3*S*,5*R*,7*S*,8*R*,9*S*,10*R*)-diethyl 7,8:9,10-di-O-isopropylidene-3-phenyl-2-tosyl-6-oxa-2-azaspiro[4.5]decane-1,1-dicarboxylate ((5*R*)-5bb)**

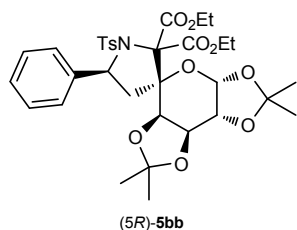

White solid (petroleum ether/EtOAc = 4:1,  $R_f$  = 0.38, 15% isolated yield); mp: 172–174 °C;  $[\alpha]_D^{20}$  = -59 (c 1.0, CH<sub>2</sub>Cl<sub>2</sub>); <sup>1</sup>H NMR (400 MHz, CDCl<sub>3</sub>)  $\delta$  7.39 (d,  $J$  = 8.4 Hz, 2H), 7.20–7.18 (m, 2H), 7.09–7.04 (m, 3H), 6.94 (d,  $J$  = 8.0 Hz,

2H), 5.66 (d,  $J$  = 10.4 Hz, 1H), 4.94 (d,  $J$  = 6.8 Hz, 1H), 4.60–4.53 (m, 1H), 4.50 (d,  $J$  = 6.8 Hz, 1H), 4.44–4.36 (m, 2H), 4.34–4.26 (m, 1H), 4.18–4.10 (m, 1H), 3.99 (d,  $J$  = 3.2 Hz, 1H), 3.24 (dd,  $J$  = 14.0, 10.0 Hz, 1H), 2.29 (s, 3H), 2.02 (d,  $J$  = 14.0 Hz, 1H), 1.45 (s, 3H), 1.42 (t,  $J$  = 7.2 Hz, 3H), 1.35 (t,  $J$  = 7.2 Hz, 3H), 1.33 (s, 3H), 1.31 (s, 3H), 1.18 (s, 3H); <sup>13</sup>C NMR (100 MHz, CDCl<sub>3</sub>)  $\delta$  166.2, 165.2, 142.8, 140.6, 138.0, 128.8, 128.2, 127.9, 127.7, 127.0, 110.5, 109.0, 93.5, 89.2, 83.6, 75.6, 75.1, 68.4, 63.5, 62.8, 62.2, 34.5, 27.6, 26.2, 25.9, 25.2, 21.6, 14.2, 14.0. HRMS calcd for C<sub>33</sub>H<sub>42</sub>NO<sub>11</sub>S [M+H]<sup>+</sup>: 660.2473, found for: 660.2473.

**(3*S*,5*S*,7*S*,8*R*,9*S*,10*R*)-diethyl 7,8:9,10-di-O-isopropylidene-3-phenyl-2-tosyl-6-oxa-2-azaspiro[4.5]decane-1,1-dicarboxylate ((5*S*)-5bb)**

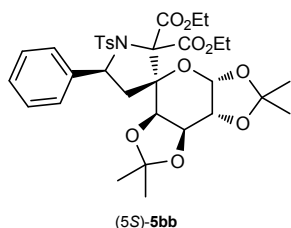

White solid (petroleum ether/EtOA = 4:1,  $R_f$  = 0.26, 66% isolated yield); mp: 166–170 °C;  $[\alpha]_D^{20}$  = -37 (c 1.0, CH<sub>2</sub>Cl<sub>2</sub>); <sup>1</sup>H NMR (400 MHz, CDCl<sub>3</sub>)  $\delta$  7.21 (d,  $J$  = 8.4 Hz, 2H), 7.12–7.06 (m, 3H), 6.95 (dd,  $J$  = 13.6, 7.8 Hz, 4H),

5.57 (d,  $J$  = 3.2 Hz, 1H), 5.24 (t,  $J$  = 7.4 Hz, 1H), 4.52–4.24 (m, 5H), 4.18 (d,  $J$  = 5.2 Hz, 1H), 3.87 (d,  $J$  = 3.2 Hz, 1H), 2.91 (dd,  $J$  = 12.8, 7.2 Hz, 1H), 2.31 (s, 3H), 2.22 (dd,  $J$  = 12.4, 7.6 Hz, 1H), 1.42(t,  $J$  = 7.2 Hz, 3H), 1.41(t,  $J$  = 7.2 Hz, 3H), 1.41 (s, 3H), 1.40 (s, 3H), 1.28 (s, 3H), 1.26 (s, 3H); <sup>13</sup>C NMR (100 MHz, CDCl<sub>3</sub>)  $\delta$  168.2, 165.8, 142.6, 138.6, 137.5, 128.6, 128.6, 128.3, 127.9, 127.8, 109.7, 109.7, 96.0, 84.6, 82.5, 73.4, 72.5, 62.9, 62.4, 61.9, 46.6, 29.8, 27.5, 26.9, 25.5, 25.3, 21.5, 14.2, 14.1. HRMS calcd for C<sub>33</sub>H<sub>42</sub>NO<sub>11</sub>S [M+H]<sup>+</sup>: 660.2473, found for: 660.2473.

**(3*S*,5*R*,7*S*,8*R*,9*S*,10*R*)-diethyl 7,8:9,10-di-O-isopropylidene-3-(4-methylphenyl)-2-tosyl-6-oxa-2-azaspiro[4.5]decane-1,1-dicarboxylate ((5*R*)-5hb)**

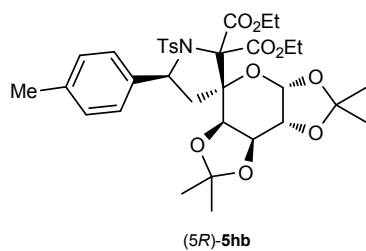

White solid (petroleum ether/EtOAc = 4:1,  $R_f$  = 0.36, 16% isolated yield); mp: 190–192 °C;  $[\alpha]_D^{20}$  = -48 (c 1.0, CH<sub>2</sub>Cl<sub>2</sub>); <sup>1</sup>H NMR (400 MHz, CDCl<sub>3</sub>) δ 7.36 (d,  $J$  = 8.4 Hz, 2H), 7.09 (d,  $J$  = 8.4 Hz, 2H), 6.93 (d,  $J$  = 8.0 Hz, 2H), 6.87 (d,  $J$  = 8.0 Hz, 2H), 5.60 (d,  $J$  = 10.4 Hz,

1H), 4.94 (d,  $J$  = 6.4 Hz, 1H), 4.59–4.53 (m, 1H), 4.52–4.50 (m, 2H), 4.43–4.35 (m, 1H), 4.34–4.26 (m, 1H), 4.16–4.08 (m, 1H), 4.01 (d,  $J$  = 3.2 Hz, 1H), 3.20 (dd,  $J$  = 14.0, 10.4 Hz, 1H), 2.29 (s, 3H), 2.26 (s, 3H), 1.98 (d,  $J$  = 14.4 Hz, 1H), 1.45 (s, 3H), 1.42 (t,  $J$  = 7.2 Hz, 3H), 1.34 (t,  $J$  = 7.2 Hz, 3H), 1.34 (s, 3H), 1.31 (s, 3H), 1.20 (s, 3H); <sup>13</sup>C NMR (100 MHz, CDCl<sub>3</sub>) δ 166.2, 165.2, 142.7, 138.1, 137.7, 136.5, 128.8, 128.6, 128.2, 127.6, 110.6, 108.9, 93.6, 89.1, 83.5, 75.6, 75.2, 68.5, 63.5, 62.7, 62.1, 34.3, 27.6, 26.2, 25.9, 25.2, 21.5, 21.2, 14.2, 14.0. HRMS calcd for C<sub>34</sub>H<sub>44</sub>NO<sub>11</sub>S [M+H]<sup>+</sup>: 674.2630, found for: 674.2630.

**(3S, 5R, 7S, 8R, 9S, 10R)-diethyl 7,8:9,10-di-O-isopropylidene-3-(4-methylphenyl)-2-tosyl-6-oxa-2-azaspiro[4.5]decane-1,1-dicarboxylate ((5S)-5hb)**

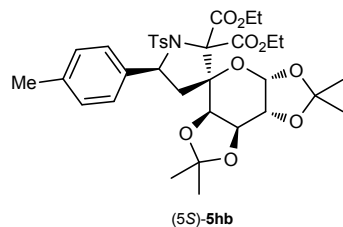

White solid (petroleum ether/EtOAc = 4:1,  $R_f$  = 0.25, 76% isolated yield); mp: 180–182 °C;  $[\alpha]_D^{20}$  = -49 (c 1.0, CH<sub>2</sub>Cl<sub>2</sub>); <sup>1</sup>H NMR (400 MHz, CDCl<sub>3</sub>) δ 7.19 (d,  $J$  = 8.4 Hz, 2H), 6.95 (dLd,  $J$  = 21.6, 8.0 Hz, 4H), 6.74 (d,  $J$  =

7.6 Hz, 2H), 5.56 (d,  $J$  = 2.8 Hz, 1H), 5.15 (t,  $J$  = 7.6 Hz, 1H), 4.49–4.45 (m, 2H), 4.42–4.38 (m, 1H), 4.36–4.27 (m, 2H), 4.22 (d,  $J$  = 5.2 Hz, 1H), 3.87 (d,  $J$  = 2.8 Hz, 1H), 2.81 (dd,  $J$  = 12.4, 6.4 Hz, 1H), 2.32 (s, 3H), 2.28–2.18 (m, 4H), 1.41–1.40 (m, 12H), 1.28 (s, 6H); <sup>13</sup>C NMR (100 MHz, CDCl<sub>3</sub>) δ 168.3, 165.8, 142.4, 138.9, 137.6, 133.9, 128.7, 128.5, 128.4, 128.2, 109.8, 109.6, 95.9, 84.5, 82.7, 73.6, 72.5, 62.7, 62.4, 61.9, 46.6, 27.5, 27.0, 25.5, 25.3, 21.5, 21.2, 14.1. HRMS calcd for C<sub>34</sub>H<sub>44</sub>NO<sub>11</sub>S [M+H]<sup>+</sup>: 674.2630, found for: 674.2630.

**Compound (8R)-3hc**

White solid (petroleum ether/EtOAc = 1:1,  $R_f$  = 0.36, 47% isolated yield); mp: 100–102 °C;  $[\alpha]_D^{20}$  = +38 (c 1.0, CH<sub>2</sub>Cl<sub>2</sub>); <sup>1</sup>H NMR (400 MHz, CDCl<sub>3</sub>) δ 8.00 (d,  $J$  = 8.4 Hz, 2H), 7.97–7.95 (m, 2H), 7.66 (t,  $J$  = 7.4 Hz, 1H), 7.50 (dd,  $J$  = 17.2, 8.4 Hz, 3H),

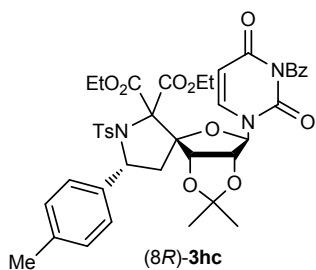

7.29 (d,  $J = 8.0$  Hz, 2H), 7.08 (dd,  $J = 38.4, 8.0$  Hz, 4H), 6.32 (s, 1H), 6.05 (d,  $J = 8.4$  Hz, 1H), 5.80 (d,  $J = 6.0$  Hz, 1H), 5.55 (d,  $J = 10.8$  Hz, 1H), 5.27 (d,  $J = 11.6$  Hz, 1H), 4.81 (d,  $J = 6.0$  Hz, 1H), 4.50 (s, 1H), 4.32–4.18 (m, 4H), 2.39 (s, 3H), 2.27 (s, 3H), 1.38 (s, 3H), 1.33 (s, 3H), 1.29 (t,  $J = 7.2$ , 3H), 1.28 (t,  $J = 7.2$ , 3H);  $^{13}\text{C}$  NMR (100 MHz,  $\text{CDCl}_3$ )  $\delta$  168.5, 167.6, 166.2, 161.9, 159.3, 149.0, 144.1, 139.8, 137.9, 136.8, 135.3, 134.5, 131.5, 130.6, 129.7, 129.3, 129.2, 128.6, 127.2, 114.4, 103.5, 101.8, 90.9, 83.3, 76.3, 62.6, 62.5, 61.5, 57.6, 26.8, 25.9, 21.6, 21.0, 14.1, 13.9. HRMS calcd for  $\text{C}_{41}\text{H}_{44}\text{N}_3\text{O}_{12}\text{S}$   $[\text{M}+\text{H}]^+$ : 802.2640, found for: 802.2644.

### Compound (8S)-3hc

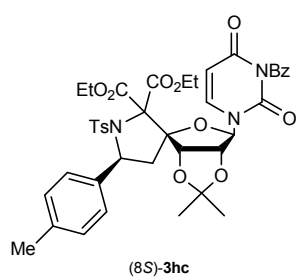

White solid (petroleum ether/EtOAc = 1:1,  $R_f = 0.31$ , 20% isolated yield); mp: 126–130 °C;  $[\alpha]_D^{20} = +133$  (c 1.0,  $\text{CH}_2\text{Cl}_2$ );  $^1\text{H}$  NMR (400 MHz,  $\text{CDCl}_3$ )  $\delta$  8.02 (d,  $J = 7.2$  Hz, 2H), 7.88 (d,  $J = 8.4$  Hz, 2H), 7.60 (t,  $J = 7.6$  Hz, 1H), 7.55 (d,  $J = 8.4$  Hz, 1H), 7.47 (t,  $J = 7.8$  Hz, 2H), 7.23 (d,  $J = 8.4$  Hz, 2H), 7.00 (s, 4H), 5.92 (d,  $J = 8.4$  Hz, 2H), 5.76 (d,  $J = 9.2$  Hz, 1H), 5.28 (d,  $J = 6.0$  Hz, 1H), 5.14 (d,  $J = 9.2$  Hz, 1H), 5.01 (d,  $J = 5.6$  Hz, 1H), 4.44 (s, 1H), 4.19–4.04 (m, 4H), 2.39 (s, 3H), 2.26 (s, 3H), 1.44 (s, 3H), 1.38 (s, 3H), 1.16 (t,  $J = 7.2$  Hz, 3H), 1.15 (t,  $J = 7.2$  Hz, 3H);  $^{13}\text{C}$  NMR (100 MHz,  $\text{CDCl}_3$ )  $\delta$  168.9, 167.1, 166.4, 162.2, 156.9, 149.3, 143.8, 138.1, 137.5, 135.4, 134.2, 131.4, 131.0, 129.5, 129.4, 129.3, 128.6, 127.9, 114.2, 103.2, 82.9, 79.4, 62.5, 62.2, 61.7, 56.9, 27.0, 25.9, 21.7, 21.2, 14.0, 13.9. HRMS calcd for  $\text{C}_{41}\text{H}_{44}\text{N}_3\text{O}_{12}\text{S}$   $[\text{M}+\text{H}]^+$ : 802.2640, found for: 802.2643.

### Uncyclized product 4

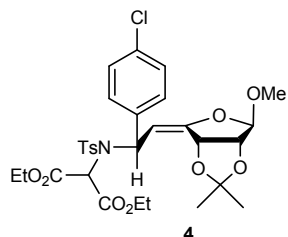

White solid (petroleum ether/EtOAc = 4:1,  $R_f = 0.21$ ); mp: 132–136 °C;  $[\alpha]_D^{20} = -16$  (c 1.0,  $\text{CH}_2\text{Cl}_2$ );  $^1\text{H}$  NMR (400 MHz,  $\text{CDCl}_3$ )  $\delta$  7.79 (d,  $J = 8.4$  Hz, 2H), 7.28 (d,  $J = 4.8$  Hz, 2H), 7.22 (d,  $J = 8.4$  Hz, 2H), 7.16 (d,  $J = 8.4$  Hz, 2H), 5.78 (d,  $J = 8.4$  Hz, 1H), 5.08 (s, 1H), 5.02 (d,  $J = 8.8$  Hz, 1H), 4.96 (d,  $J = 6.0$  Hz, 1H), 4.58 (s, 1H), 4.45 (d,  $J = 5.6$  Hz, 2H), 4.32–4.18 (m, 2H), 4.14–4.10 (m, 2H), 3.40 (s,



3H), 2.40 (s, 3H), 1.35 (s, 3H), 1.34 (s, 3H), 1.30 (t,  $J = 7.2$ , 3H), 1.21 (t,  $J = 7.2$ , 3H);  $^{13}\text{C}$  NMR (100 MHz,  $\text{CDCl}_3$ )  $\delta$  166.8, 166.4, 156.5, 143.5, 137.7, 136.3, 133.9, 130.1, 129.2, 128.3, 128.3, 113.2, 109.1, 100.2, 82.2, 78.7, 62.5, 62.2, 62.0, 57.1, 56.2, 27.0, 25.9, 21.7, 14.0, 14.0; HRMS calcd for  $\text{C}_{30}\text{H}_{37}\text{ClNO}_{10}\text{S}$   $[\text{M}+\text{H}]^+$ : 638.1822, found for: 638.1816.

### Uncyclized product 6

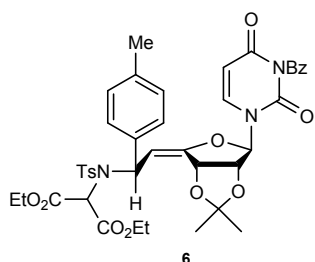

White solid (petroleum ether/EtOAc = 1:1,  $R_f = 0.26$ , 26% isolated yield); mp: 102–104 °C;  $[\alpha]_{\text{D}}^{20} = -24$  (c 1.0,  $\text{CH}_2\text{Cl}_2$ );  $^1\text{H}$  NMR (400 MHz,  $\text{CDCl}_3$ )  $\delta$  8.01 (d,  $J = 8.4$  Hz, 2H), 7.96 (d,  $J = 7.2$  Hz, 2H), 7.70 (t,  $J = 7.4$  Hz, 1H), 7.55 (t,  $J = 7.8$  Hz, 2H), 7.30 (dd,  $J = 8.2$ , 3.4 Hz, 1H), 7.25 (s, 2H), 6.92 (d,  $J = 6.8$  Hz, 2H), 6.64 (s, 2H), 5.86 (d,  $J = 8.0$  Hz, 1H), 5.65 (d,  $J = 8.0$  Hz, 1H), 5.57 (s, 1H), 5.29 (d,  $J = 8.0$  Hz, 1H), 4.90 (dd,  $J = 36.4$ , 6.0 Hz, 2H), 4.36–4.22 (m, 3H), 4.05–3.99 (m, 2H), 2.41 (s, 3H), 2.16 (s, 3H), 1.50 (s, 3H), 1.31 (t,  $J = 7.2$  Hz, 3H), 1.30 (t,  $J = 7.2$  Hz, 3H), 1.13 (t,  $J = 7.2$  Hz, 3H);  $^{13}\text{C}$  NMR (100 MHz,  $\text{CDCl}_3$ )  $\delta$  168.1, 167.1, 166.3, 161.9, 158.5, 149.3, 143.4, 137.9, 137.4, 135.6, 133.8, 131.4, 130.6, 129.4, 129.2, 129.1, 128.9, 114.1, 102.9, 100.3, 97.7, 83.2, 78.1, 62.5, 61.9, 61.7, 57.5, 26.7, 25.8, 21.7, 21.1, 14.1, 13.9. HRMS calcd for  $\text{C}_{41}\text{H}_{44}\text{N}_3\text{O}_{12}\text{S}$   $[\text{M}+\text{Na}]^+$ : 824.2460, found for: 824.2459.

### (2*R*,3*R*,4*S*,5*R*,8*S*)-diethyl 8-(4-chlorophenyl)-3,4-*O*-isopropylidene-2-methoxy-1-oxa-7-azaspiro[4.4]nonane-6,6-dicarboxylate (7)

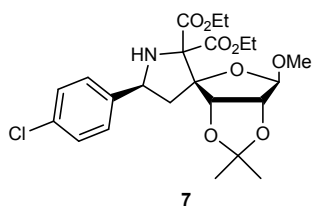

White solid (petroleum ether/EtOAc = 3:1,  $R_f = 0.47$ , 87% isolated yield); mp: 102–106 °C;  $[\alpha]_{\text{D}}^{20} = -75$  (c 1.0,  $\text{CH}_2\text{Cl}_2$ );  $^1\text{H}$  NMR (400 MHz,  $\text{CDCl}_3$ )  $\delta$  7.25 (d,  $J = 1.6$  Hz, 4H), 5.27 (d,  $J = 6.8$  Hz, 1H), 4.98 (s, 1H), 4.62 (dd,  $J = 11.2$ , 6.0 Hz, 1H), 4.57 (d,  $J = 6.8$  Hz, 1H), 4.42–4.36 (m, 1H), 4.34–4.18 (m, 2H), 4.12–4.04 (m, 1H), 3.63 (s, 1H), 3.31 (s, 3H), 2.48 (dd,  $J = 13.2$ , 11.2 Hz, 1H), 2.24 (dd,  $J = 13.2$ , 6.0 Hz, 1H), 1.48 (s, 3H), 1.35 (s, 3H), 1.29 (t,  $J = 7.2$  Hz, 3H), 1.29 (t,  $J = 7.2$  Hz, 3H);  $^{13}\text{C}$  NMR (100 MHz,  $\text{CDCl}_3$ )  $\delta$  170.4, 168.2, 143.1, 132.6, 128.5,

128.1, 113.1, 108.5, 99.1, 86.2, 80.8, 77.7, 62.3, 61.7, 59.4, 56.5, 46.2, 26.3, 24.8, 14.1, 14.0. HRMS calcd for C<sub>23</sub>H<sub>31</sub>ClNO<sub>8</sub> [M+H]<sup>+</sup>: 484.1732, found for: 484.1732.

**Ethyl-2,3-dihydroxy-5-oxo-7-(*o*-tolyl)-6-tosyloctahydrofuro[2',3':4,5]furo[3,4-b]pyrrole-5a-carboxylate (8)**

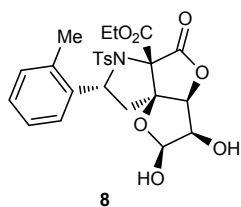

White solid (petroleum ether/EtOAc = 1:2,  $R_f$  = 0.4, 68% isolated yield); mp: 228–230 °C; <sup>1</sup>H NMR (400 MHz, CDCl<sub>3</sub>) δ 7.31 (d,  $J$  = 8.4 Hz, 2H), 7.12 (d,  $J$  = 7.6 Hz, 1H), 7.01 (dd,  $J$  = 10.8, 8.0 Hz, 3H), 6.56 (t,  $J$  = 7.6 Hz, 1H), 6.26 (d,  $J$  = 8.0 Hz, 1H), 5.82 (d,  $J$  = 10.4 Hz, 1H), 5.43 (t,  $J$  = 3.8 Hz, 1H), 4.62 (d,  $J$  = 3.2 Hz, 1H), 4.51–4.42 (m, 2H), 4.40 (d,  $J$  = 5.2 Hz, 1H), 4.06–4.04 (m, 1H), 3.44 (d,  $J$  = 12.0 Hz, 1H), 3.17–3.11 (m, 1H), 2.34 (s, 3H), 2.32 (s, 3H), 1.98 (d,  $J$  = 12.8 Hz, 1H), 1.46 (t,  $J$  = 7.2 Hz, 3H). <sup>13</sup>C NMR (100 MHz, CDCl<sub>3</sub>) δ 168.0, 166.0, 144.0, 137.1, 137.1, 134.7, 131.0, 129.2, 128.0, 127.4, 125.7, 124.7, 95.4, 95.2, 80.6, 75.0, 72.3, 63.0, 60.5, 40.3, 21.6, 19.6, 14.2. HRMS calcd for C<sub>25</sub>H<sub>27</sub>NO<sub>9</sub>SNa [M+Na]<sup>+</sup>: 540.1299, found for: 540.1297.

## 8. X-ray crystallographic data of the compounds

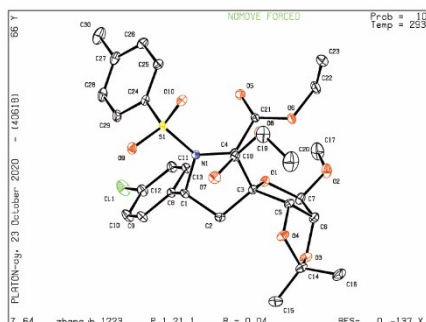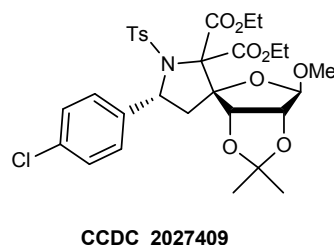

### X-ray Crystallographic Data of Compound (8R)-3aa

|                        |                                                        |                                                        |             |
|------------------------|--------------------------------------------------------|--------------------------------------------------------|-------------|
| Bond precision:        | C-C = 0.0056 Å                                         | Wavelength=1.54184                                     |             |
| Cell:                  | a=9.45912(18)                                          | b=18.2843(3)                                           | c=9.6046(7) |
|                        | alpha=90                                               | beta=106.411(2)                                        | gamma=90    |
| Temperature:           | 293 K                                                  |                                                        |             |
|                        | Calculated                                             | Reported                                               |             |
| Volume                 | 1593.47(5)                                             | 1593.48(6)                                             |             |
| Space group            | P 21                                                   | P 1 21 1                                               |             |
| Hall group             | P 2yb                                                  | P 2yb                                                  |             |
| Moiety formula         | C <sub>30</sub> H <sub>35</sub> Cl N O <sub>10</sub> S | C <sub>30</sub> H <sub>35</sub> Cl N O <sub>10</sub> S |             |
| Sum formula            | C <sub>30</sub> H <sub>35</sub> Cl N O <sub>10</sub> S | C <sub>30</sub> H <sub>35</sub> Cl N O <sub>10</sub> S |             |
| Mr                     | 637.10                                                 | 637.10                                                 |             |
| Dx,g cm <sup>-3</sup>  | 1.328                                                  | 1.328                                                  |             |
| Z                      | 2                                                      | 2                                                      |             |
| Mu (mm <sup>-1</sup> ) | 2.152                                                  | 2.152                                                  |             |
| F000                   | 670.0                                                  | 670.0                                                  |             |
| F000'                  | 673.46                                                 |                                                        |             |
| h,k,lmax               | 11, 21, 11                                             | 11, 21, 11                                             |             |
| Nref                   | 5641[2919]                                             | 5634                                                   |             |
| Tmin,Tmax              | 0.793, 0.860                                           | 0.481, 1.000                                           |             |
| Tmin'                  | 0.789                                                  |                                                        |             |
| Correction method=     | # Reported T Limits: Tmin=0.414 Tmax=1.000             |                                                        |             |
| AbsCorr =              | MULTI-SCAN                                             |                                                        |             |
| Data completeness=     | 1.93/1.00                                              | Theta(max)= 66.590                                     |             |
| R(reflections)=        | 0.0330 ( 5312)                                         | wR2(reflections)= 0.0921( 5634)                        |             |
| S =                    | 1.038                                                  | Npar= 394                                              |             |

## X-ray Crystallographic Data of Compound (8*S*)-3aa

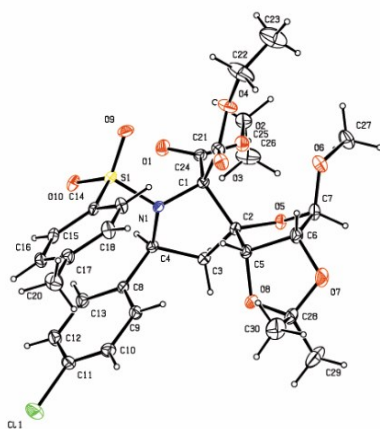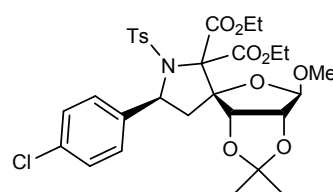

CCDC 2025635

|                        |                                                        |                                                        |
|------------------------|--------------------------------------------------------|--------------------------------------------------------|
| Bond precision:        | C-C = 0.0076 Å                                         | Wavelength=1.54184                                     |
| Cell:                  | a=11.1994(3)<br>alpha=90                               | b=13.4972(5)<br>beta=106.660(2)                        |
| Temperature:           | 293 K                                                  | c=21.4716(7)<br>gamma=90                               |
|                        | Calculated                                             | Reported                                               |
| Volume                 | 3245.66(18)                                            | 3245.68(18)                                            |
| Space group            | P 21/c                                                 | P 1 21/c 1                                             |
| Hall group             | -P 2ybc                                                | -P 2ybc                                                |
| Moiety formula         | C <sub>30</sub> H <sub>36</sub> Cl N O <sub>10</sub> S | C <sub>30</sub> H <sub>36</sub> Cl N O <sub>10</sub> S |
| Sum formula            | C <sub>30</sub> H <sub>36</sub> Cl N O <sub>10</sub> S | C <sub>30</sub> H <sub>36</sub> Cl N O <sub>10</sub> S |
| Mr                     | 638.11                                                 | 638.11                                                 |
| Dx, g cm <sup>-3</sup> | 1.306                                                  | 1.306                                                  |
| Z                      | 4                                                      | 4                                                      |
| Mu (mm <sup>-1</sup> ) | 2.113                                                  | 2.113                                                  |
| F000                   | 1344.0                                                 | 1344.0                                                 |
| F000'                  | 1350.93                                                |                                                        |
| h,k,lmax               | 13, 16, 25                                             | 13, 16, 25                                             |
| Nref                   | 5718                                                   | 4959                                                   |
| Tmin,Tmax              | 0.881, 0.919                                           | 0.414, 1.000                                           |
| Tmin'                  | 0.810                                                  |                                                        |
| Correction method=     | # Reported T Limits: Tmin=0.414 Tmax=1.000             |                                                        |
| AbsCorr =              | MULTI-SCAN                                             |                                                        |
| Data completeness=     | 1.54/0.87                                              | Theta(max)= 66.596                                     |
| R(reflections)=        | 0.0487( 4323)                                          | wR2(reflections)= 0.1345( 4959)                        |

### X-ray Crystallographic Data of Compound (5*R*)-5bb

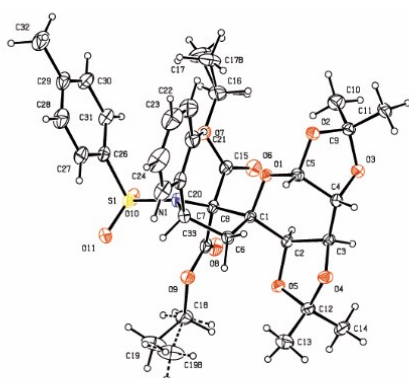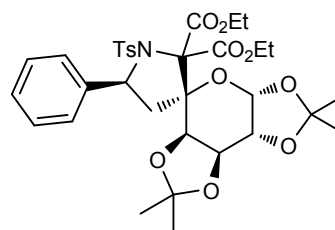

CCDC 2025967

|                                                               |                                                        |                                                        |              |
|---------------------------------------------------------------|--------------------------------------------------------|--------------------------------------------------------|--------------|
| Bond precision:                                               | C-C = 0.0050 Å                                         | Wavelength=1.54184                                     |              |
| Cell:                                                         | a=10.7929(2)                                           | b=14.1343(3)                                           | c=22.1643(5) |
|                                                               | alpha=90                                               | beta=90                                                | gamma=90     |
| Temperature:                                                  | 295 K                                                  |                                                        |              |
|                                                               | Calculated                                             | Reported                                               |              |
| Volume                                                        | 3381.17(12)                                            | 3381.19(12)                                            |              |
| Space group                                                   | P 21 21 21                                             | P 21 21 21                                             |              |
| Hall group                                                    | P 2ac 2ab                                              | P 2ac 2ab                                              |              |
| Moiety formula                                                | C <sub>33</sub> H <sub>41</sub> Cl N O <sub>11</sub> S | C <sub>33</sub> H <sub>41</sub> Cl N O <sub>11</sub> S |              |
| Sum formula                                                   | C <sub>33</sub> H <sub>41</sub> Cl N O <sub>11</sub> S | C <sub>33</sub> H <sub>41</sub> Cl N O <sub>11</sub> S |              |
| Mr                                                            | 659.73                                                 | 659.73                                                 |              |
| Dx, g cm <sup>-3</sup>                                        | 1.296                                                  | 1.296                                                  |              |
| Z                                                             | 4                                                      | 4                                                      |              |
| Mu (mm <sup>-1</sup> )                                        | 1.358                                                  | 1.358                                                  |              |
| F000                                                          | 1400.0                                                 | 1400.0                                                 |              |
| F000'                                                         | 1405.86                                                |                                                        |              |
| h,k,lmax                                                      | 12, 16, 26                                             | 12, 16, 26                                             |              |
| Nref                                                          | 5977[3366]                                             | 5138                                                   |              |
| Tmin,Tmax                                                     | 0.805, 0.850                                           | 0.593, 1.000                                           |              |
| Tmin'                                                         | 0.805                                                  |                                                        |              |
| Correction method= # Reported T Limits: Tmin=0.593 Tmax=1.000 |                                                        |                                                        |              |
| AbsCorr = MULTI-SCAN                                          |                                                        |                                                        |              |

Data completeness= 1.53/0.86  
R(reflections)= 0.0354( 4695)  
S = 1.062

Theta(max)= 66.571  
wR2(reflections)= 0.0903( 5138)  
Npar= 442

### X-ray Crystallographic Data of Compound (5*S*)-5bb

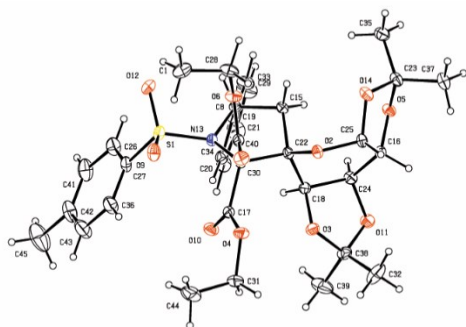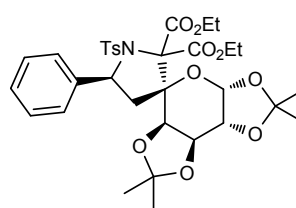

CCDC 2025642

|                                         |                                                        |                                                        |                          |
|-----------------------------------------|--------------------------------------------------------|--------------------------------------------------------|--------------------------|
| Bond precision:                         | C-C = 0.0049 Å                                         | Wavelength=1.54184                                     |                          |
| Cell:                                   | a=9.96904(13)<br>alpha=90                              | b=10.69984(16)<br>beta=90                              | c=31.3952(4)<br>gamma=90 |
| Temperature:                            | 293 K                                                  |                                                        |                          |
|                                         | Calculated                                             | Reported                                               |                          |
| Volume                                  | 3348.84(8)                                             | 3348.84(8)                                             |                          |
| Space group                             | P 21 21 21                                             | P 21 21 21                                             |                          |
| Hall group                              | P 2ac 2ab                                              | P 2ac 2ab                                              |                          |
| Moiety formula                          | C <sub>33</sub> H <sub>41</sub> Cl N O <sub>11</sub> S | C <sub>33</sub> H <sub>41</sub> Cl N O <sub>11</sub> S |                          |
| Sum formula                             | C <sub>33</sub> H <sub>41</sub> Cl N O <sub>11</sub> S | C <sub>33</sub> H <sub>41</sub> Cl N O <sub>11</sub> S |                          |
| Mr                                      | 659.73                                                 | 661.23                                                 |                          |
| Dx, g cm <sup>-3</sup>                  | 1.309                                                  | 1.311                                                  |                          |
| Z                                       | 4                                                      | 4                                                      |                          |
| Mu (mm <sup>-1</sup> )                  | 1.371                                                  | 1.367                                                  |                          |
| F <sub>000</sub>                        | 1400.0                                                 | 1403.0                                                 |                          |
| F <sub>000</sub> '                      | 1405.86                                                |                                                        |                          |
| h,k,lmax                                | 11, 12, 37                                             | 11, 12, 37                                             |                          |
| Nref                                    | 5913[3360]                                             | 5233                                                   |                          |
| Tmin,Tmax                               | 0.782, 0.849                                           | 0.663, 1.000                                           |                          |
| Tmin'                                   | 0.782                                                  |                                                        |                          |
| Correction method= # Reported T Limits: | Tmin=0.663 Tmax=1.000                                  |                                                        |                          |
| AbsCorr = MULTI-SCAN                    |                                                        |                                                        |                          |
| Data completeness= 1.56/0.88            | Theta(max)= 66.578                                     |                                                        |                          |

R(reflections)= 0.0393( 4959)  
S = 1.062

wR2(reflections)= 0.0989( 5233)  
Npar= 422

### X-ray Crystallographic Data of Compound 6

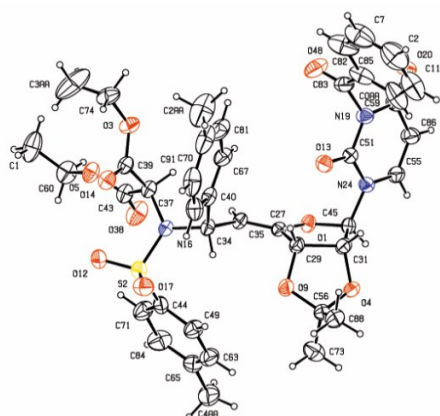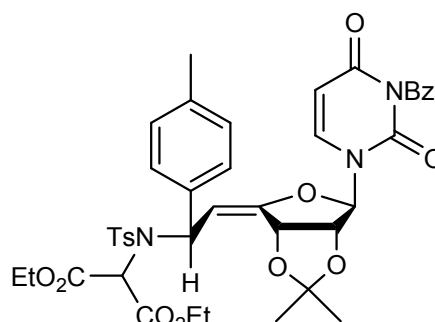

CCDC 2027410

|                        |                                                        |                                                        |                           |
|------------------------|--------------------------------------------------------|--------------------------------------------------------|---------------------------|
| Bond precision:        | C-C = 0.0091 Å                                         | Wavelength=1.54184                                     |                           |
| Cell:                  | a=11.6704(12)<br>alpha=90                              | b=19.5166(19)<br>beta=99.959(10)                       | c=11.8028(11)<br>gamma=90 |
| Temperature:           | 293 K                                                  |                                                        |                           |
|                        | Calculated                                             | Reported                                               |                           |
| Volume                 | 2647.8(5)                                              | 2647.8(5)                                              |                           |
| Space group            | P 21                                                   | P 1 21 1                                               |                           |
| Hall group             | P 2yb                                                  | P 2yb                                                  |                           |
| Moiety formula         | C <sub>41</sub> H <sub>43</sub> Cl N O <sub>12</sub> S | C <sub>41</sub> H <sub>43</sub> Cl N O <sub>12</sub> S |                           |
| Sum formula            | C <sub>41</sub> H <sub>43</sub> Cl N O <sub>12</sub> S | C <sub>41</sub> H <sub>43</sub> Cl N O <sub>12</sub> S |                           |
| Mr                     | 801.84                                                 | 801.84                                                 |                           |
| Dx, g cm <sup>-3</sup> | 1.006                                                  | 1.006                                                  |                           |
| Z                      | 2                                                      | 2                                                      |                           |
| Mu (mm <sup>-1</sup> ) | 0.971                                                  | 0.971                                                  |                           |
| F000                   | 844.0                                                  | 844.0                                                  |                           |
| F000'                  | 847.41                                                 |                                                        |                           |
| h,k,lmax               | 13, 23, 14                                             | 13, 23, 14                                             |                           |
| Nref                   | 9337 [ 4818]                                           | 7975                                                   |                           |
| Tmin,Tmax              | 0.954, 0.971                                           | 0.306, 1.000                                           |                           |
| Tmin'                  | 0.916                                                  |                                                        |                           |
| Correction method=     | # Reported T Limits: Tmin=0.306 Tmax=1.000             |                                                        |                           |
| AbsCorr =              | MULTI-SCAN                                             |                                                        |                           |
| Data completeness=     | 1.66/0.85                                              | Theta(max)= 66.597                                     |                           |

R(reflections)= 0.0502( 5501)  
S = 1.016

wR2(reflections)= 0.1567( 7975)  
Npar= 508

### X-ray Crystallographic Data of Compound 8

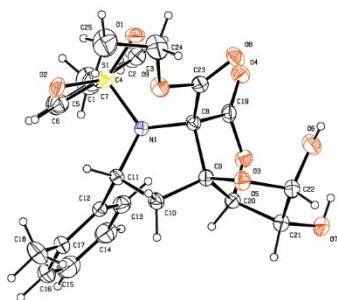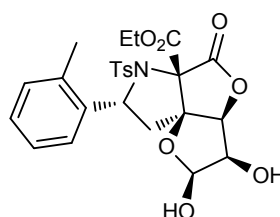

CCDC 2025644

|                                         |                                                       |                                                       |                                |
|-----------------------------------------|-------------------------------------------------------|-------------------------------------------------------|--------------------------------|
| Bond precision:                         | C-C = 0.0081 Å                                        | Wavelength=0.71073                                    |                                |
| Cell:                                   | a=7.633(3)<br>alpha=90                                | b=14.652(5)<br>beta=90                                | c=31.395222.078(8)<br>gamma=90 |
| Temperature:                            | 296 K                                                 |                                                       |                                |
|                                         | Calculated                                            | Reported                                              |                                |
| Volume                                  | 2469.2(16)                                            | 2469.1(15)                                            |                                |
| Space group                             | P 21 21 21                                            | P 21 21 21                                            |                                |
| Hall group                              | P 2ac 2ab                                             | P 2ac 2ab                                             |                                |
| Moiety formula                          | C <sub>25</sub> H <sub>27</sub> Cl N O <sub>9</sub> S | C <sub>25</sub> H <sub>27</sub> Cl N O <sub>9</sub> S |                                |
| Sum formula                             | C <sub>25</sub> H <sub>27</sub> Cl N O <sub>9</sub> S | C <sub>25</sub> H <sub>27</sub> Cl N O <sub>9</sub> S |                                |
| Mr                                      | 571.54                                                | 571.53                                                |                                |
| Dx,g cm <sup>-3</sup>                   | 1.392                                                 | 1.392                                                 |                                |
| Z                                       | 4                                                     | 4                                                     |                                |
| Mu (mm <sup>-1</sup> )                  | 0.186                                                 | 0.186                                                 |                                |
| F000                                    | 1088.0                                                | 1088.0                                                |                                |
| F000'                                   | 1089.11                                               |                                                       |                                |
| h,k,lmax                                | 9, 17, 26                                             | 9, 17, 26                                             |                                |
| Nref                                    | 4363[2505]                                            | 4345                                                  |                                |
| Tmin,Tmax                               | 0.956, 0.963                                          | 0.647, 0.745                                          |                                |
| Tmin'                                   | 0.946                                                 |                                                       |                                |
| Correction method= # Reported T Limits: | Tmin=0.647 Tmax=0.745                                 |                                                       |                                |
| AbsCorr = MULTI-SCAN                    |                                                       |                                                       |                                |
| Data completeness=                      | 1.73/1.00                                             | Theta(max)= 25.028                                    |                                |



R(reflections)= 0.0468( 3039)  
S = 0.998

wR2(reflections)= 0.1225( 4345)  
Npar= 331

---

## 9. $^1\text{H}$ NMR, $^{13}\text{C}$ NMR and $^{19}\text{F}$ NMR spectra of the compounds

### $^1\text{H}$ -NMR (400 MHz, $\text{CDCl}_3$ ) spectra of compound (1k)

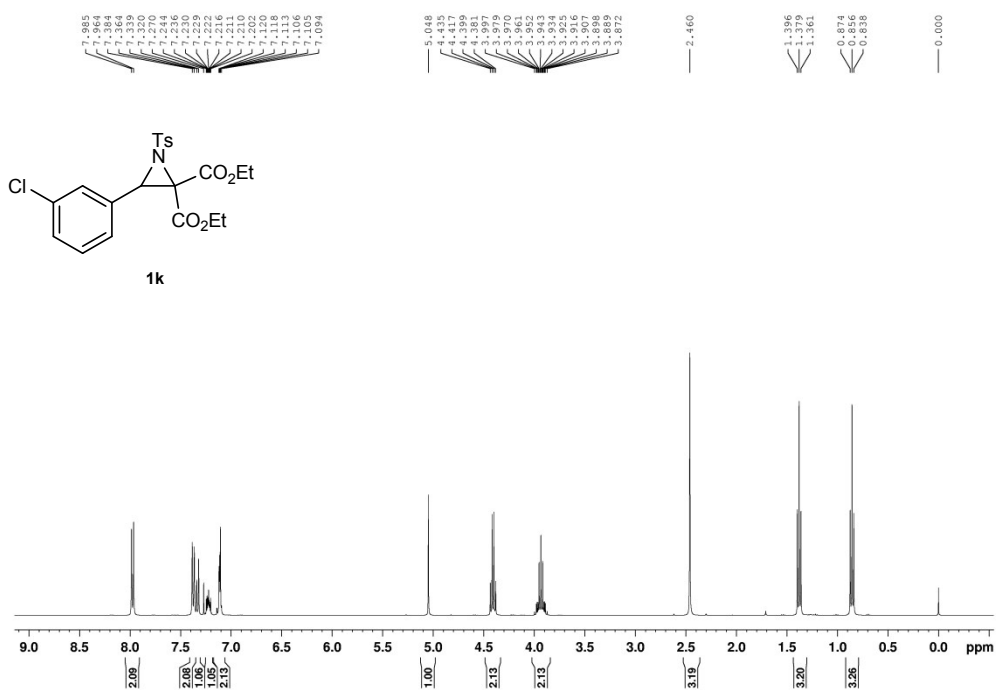

### $^{13}\text{C}$ -NMR (100 MHz, $\text{CDCl}_3$ ) spectra of compound (1k)

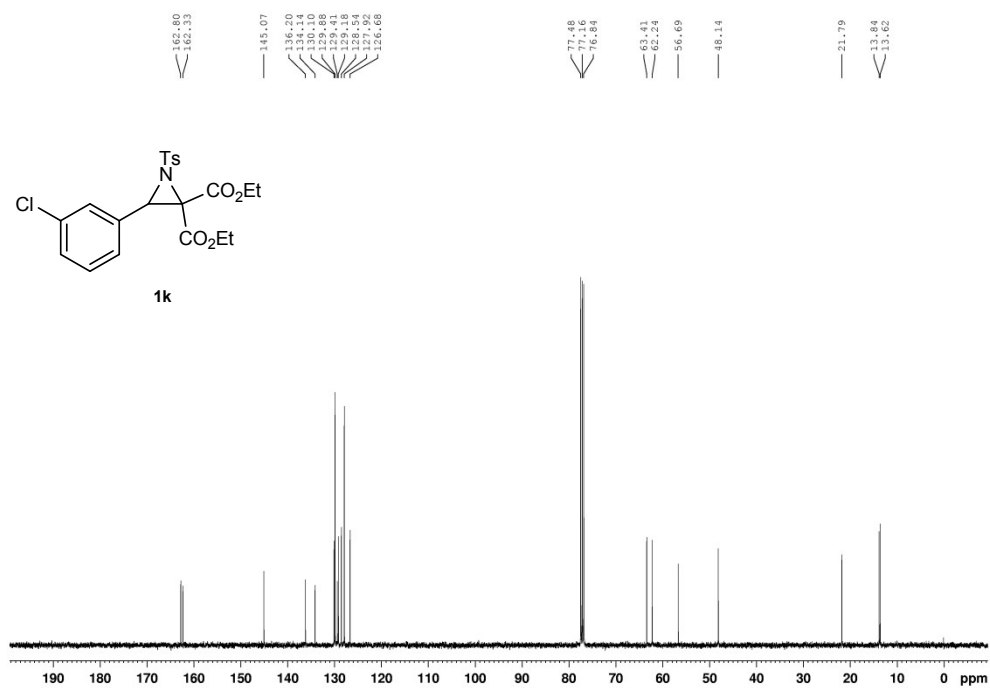

# <sup>1</sup>H-NMR (400 MHz, CDCl<sub>3</sub>) spectra of compound (11)

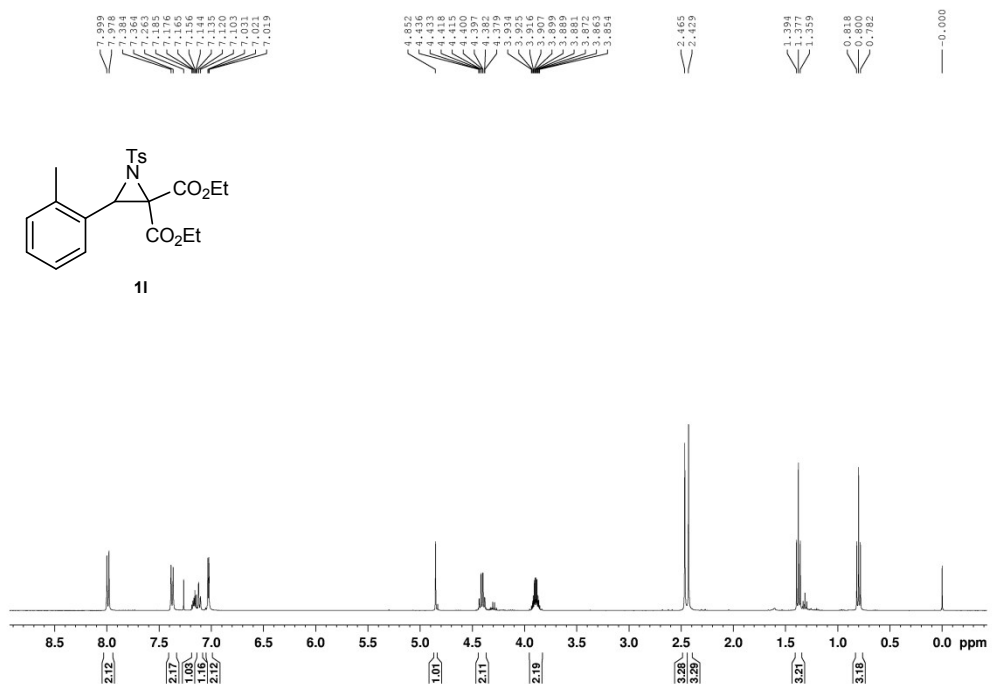

# <sup>13</sup>C-NMR (100 MHz, CDCl<sub>3</sub>) spectra of compound (11)

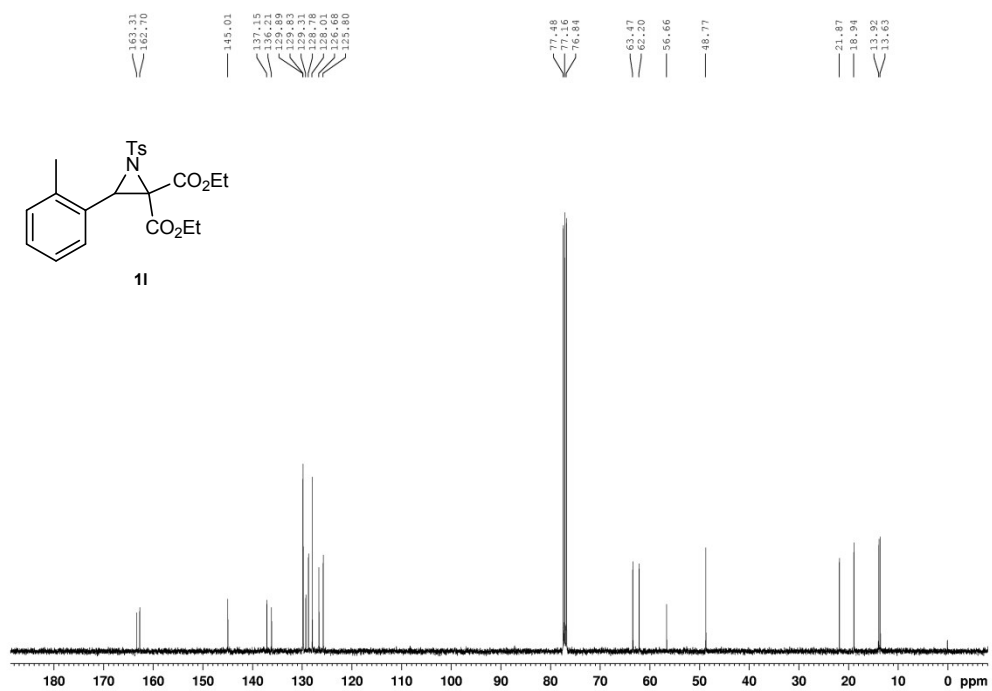

### $^1\text{H-NMR}$ (400 MHz, $\text{CDCl}_3$ ) spectra of compound (1P)

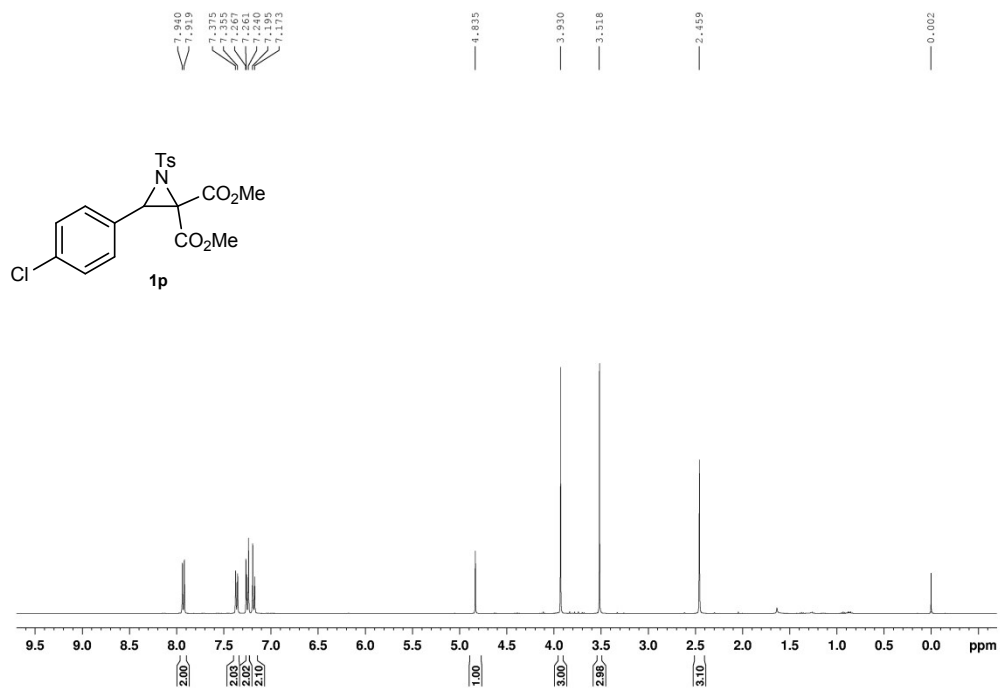

### $^{13}\text{C-NMR}$ (100 MHz, $\text{CDCl}_3$ ) spectra of compound (1P)

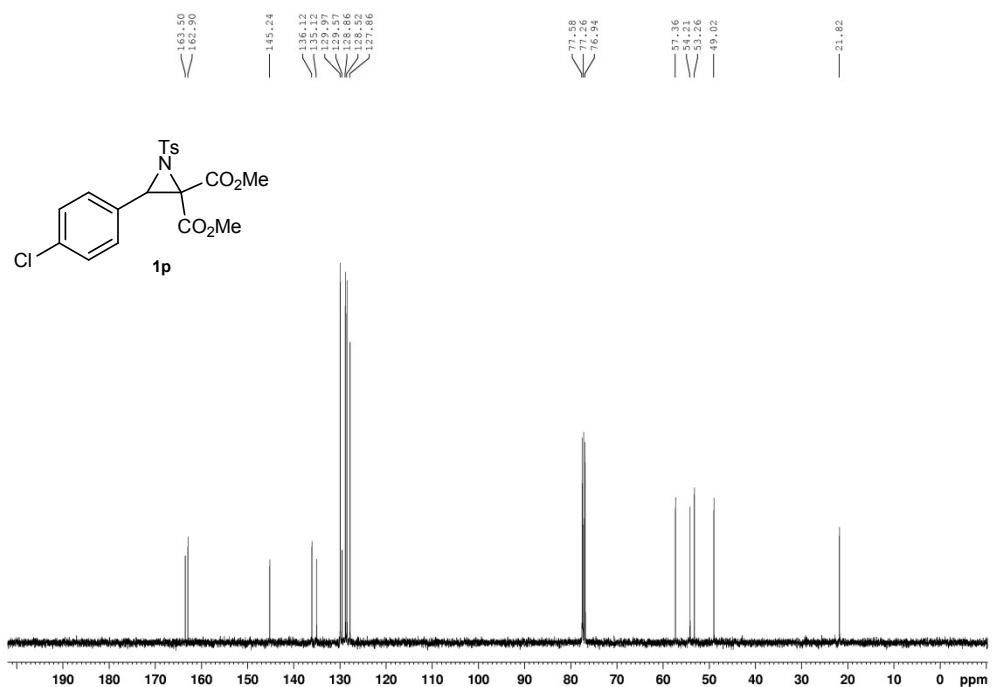

**<sup>1</sup>H-NMR (400 MHz, CDCl<sub>3</sub>) spectra of compound (8*R*)-3aa**

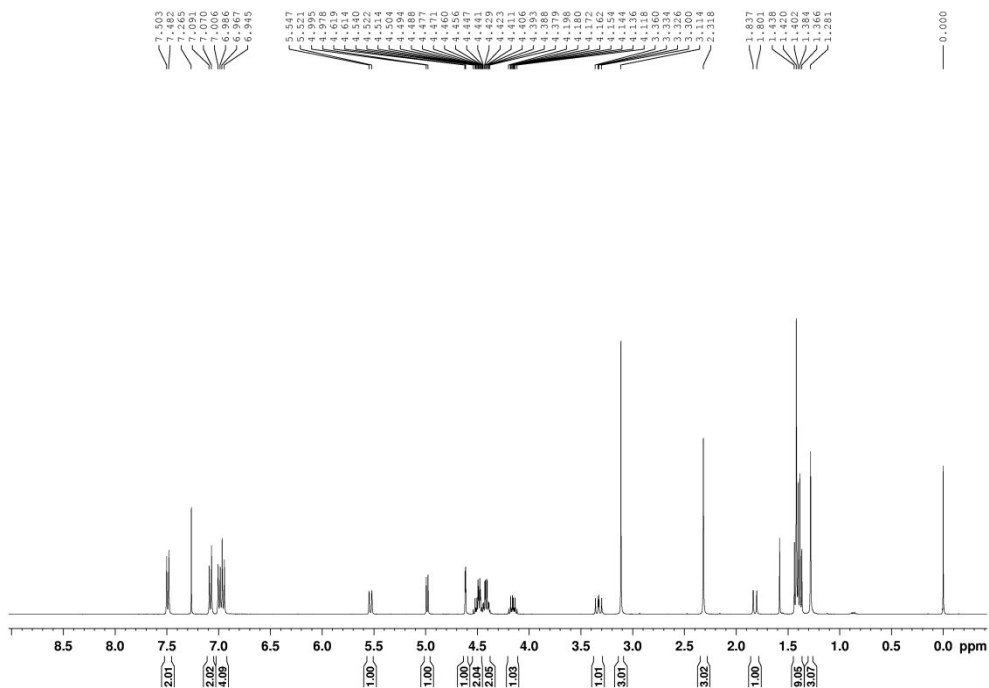

**<sup>13</sup>C-NMR (100 MHz, CDCl<sub>3</sub>) spectra of compound (8*R*)-3aa**

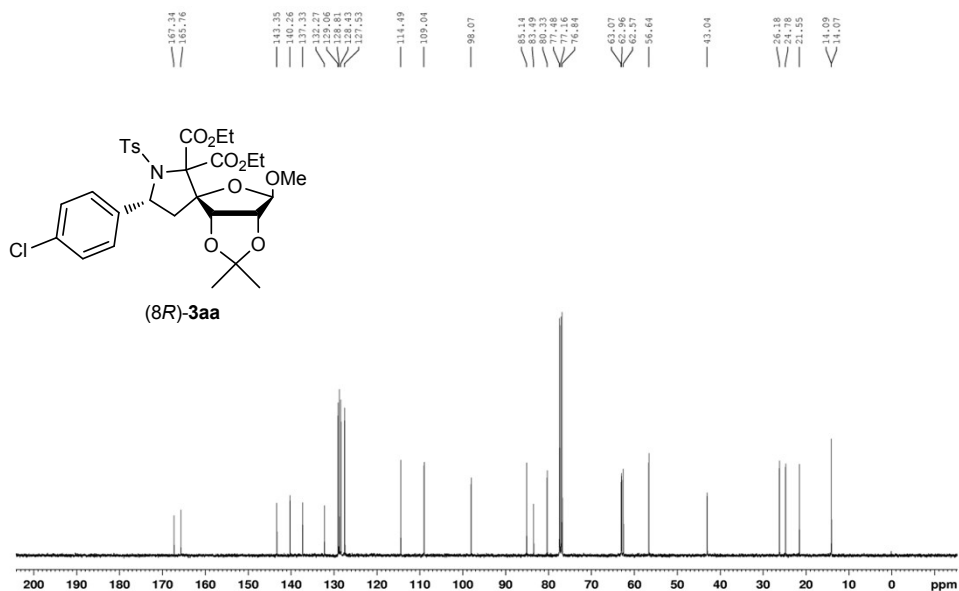



**<sup>1</sup>H-NMR (400 MHz, CDCl<sub>3</sub>) spectra of compound (8R)-3ba**

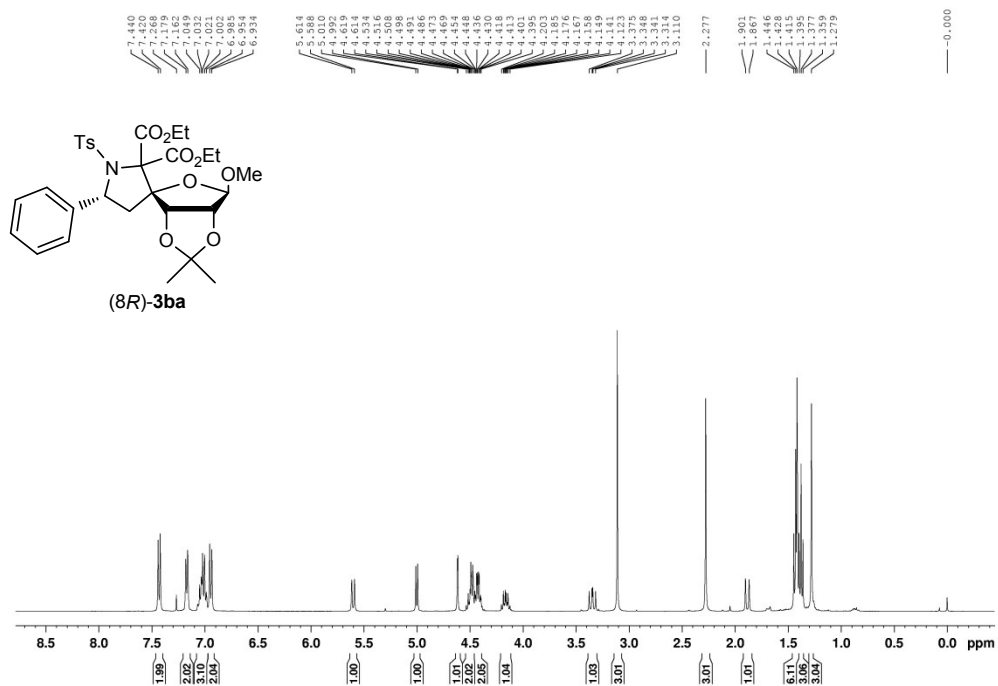

**<sup>13</sup>C-NMR (100 MHz, CDCl<sub>3</sub>) spectra of compound (8R)-3ba**

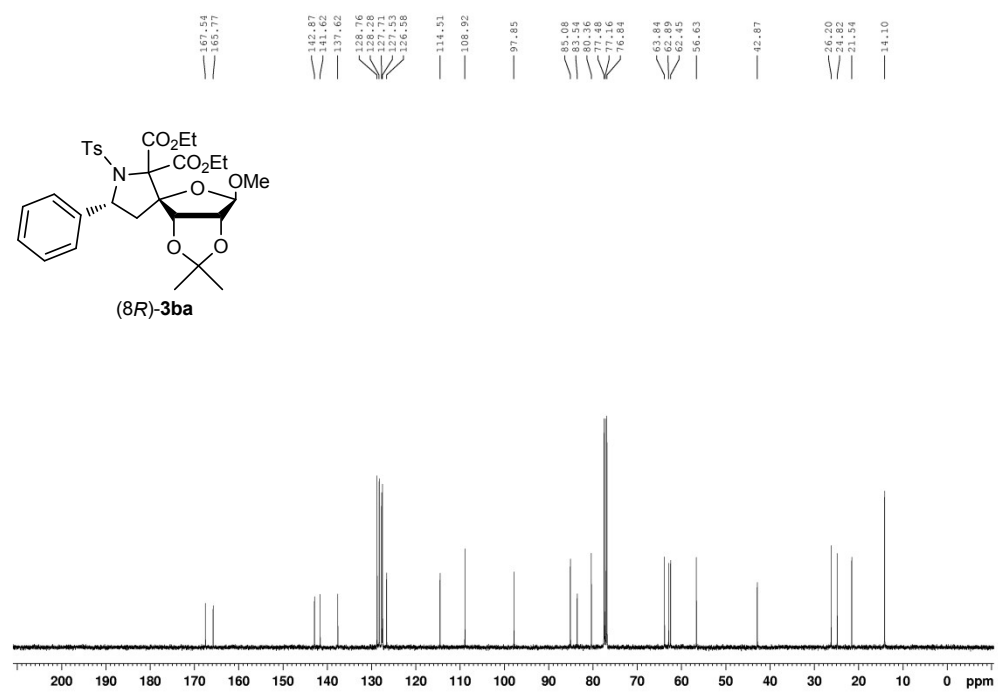





**<sup>1</sup>H-NMR (400 MHz, CDCl<sub>3</sub>) spectra of compound (8R)-3ca**

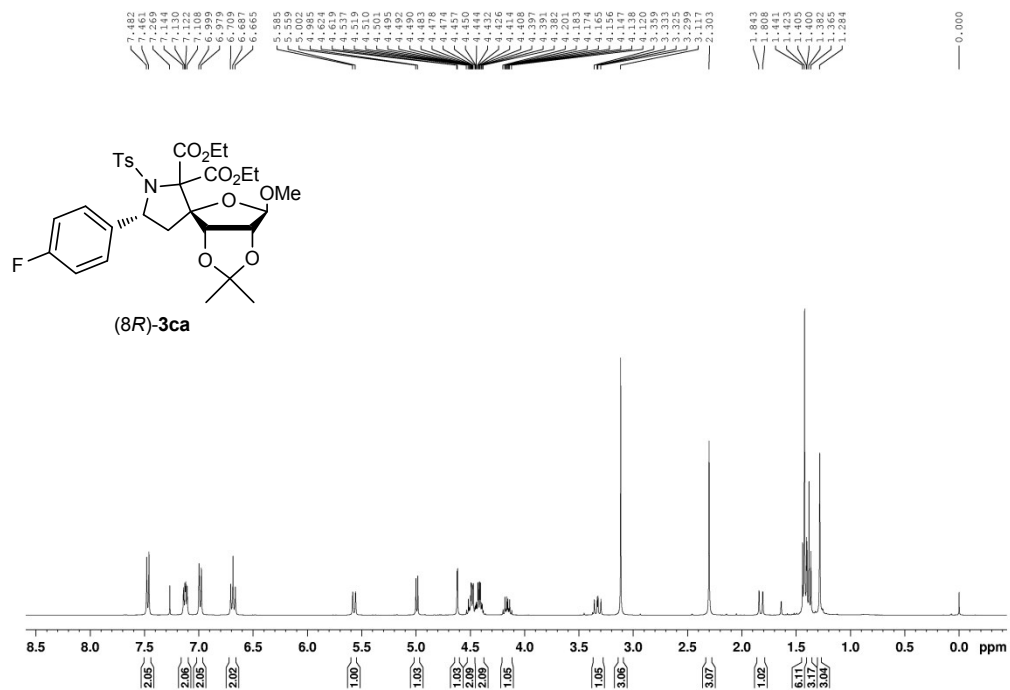

**<sup>13</sup>C-NMR (100 MHz, CDCl<sub>3</sub>) spectra of compound (8R)-3ca**

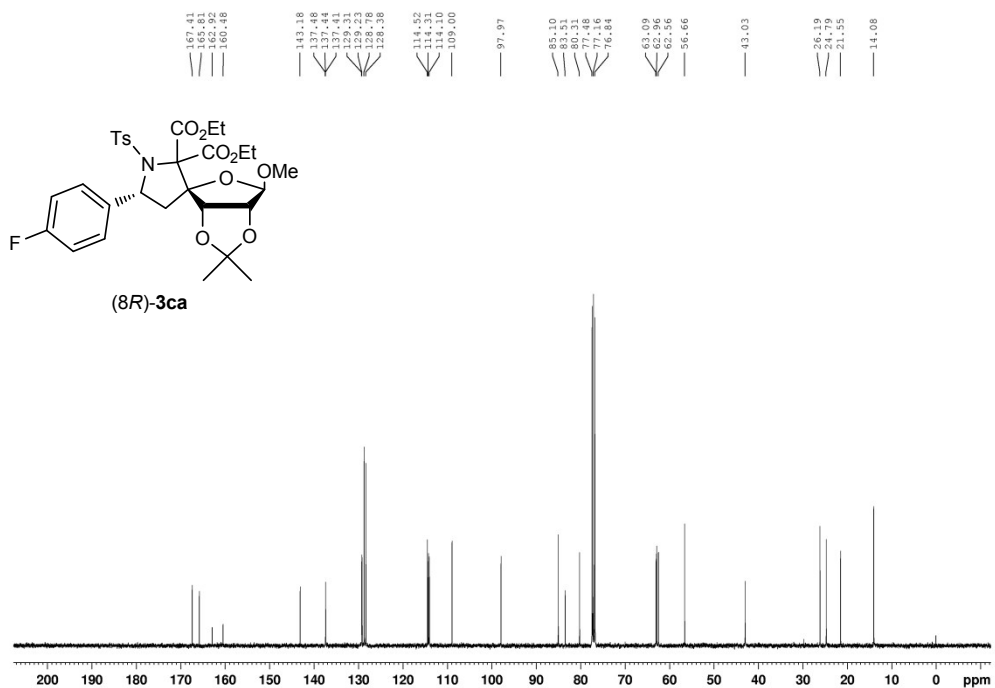

**$^{19}\text{F}$ -NMR (376 MHz,  $\text{CDCl}_3$ ) spectra of compound (8*R*)-3ca**

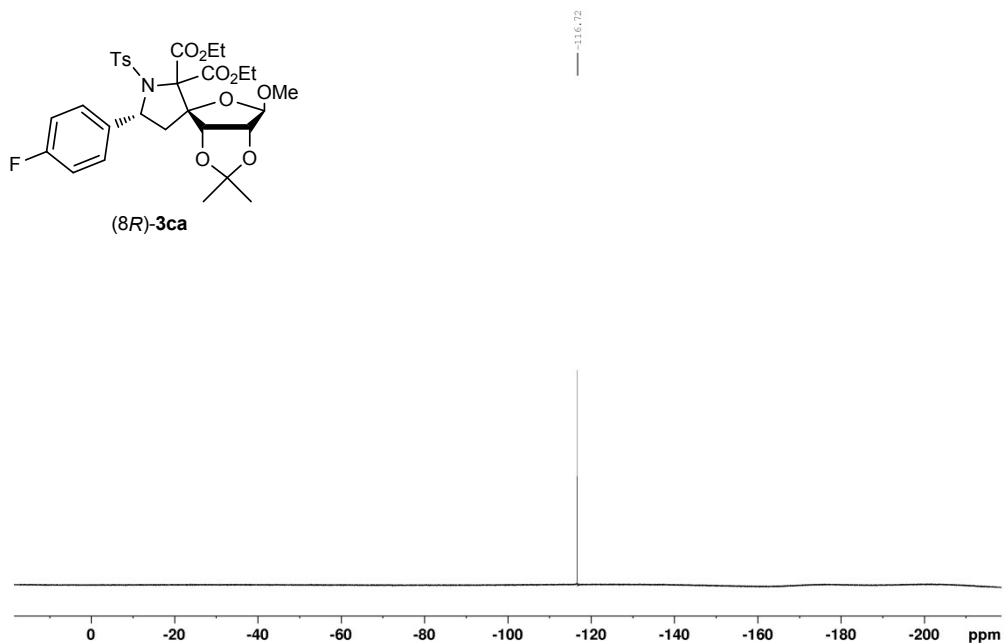

**$^1\text{H}$ -NMR (400 MHz,  $\text{CDCl}_3$ ) spectra of compound (8*S*)-3ca**

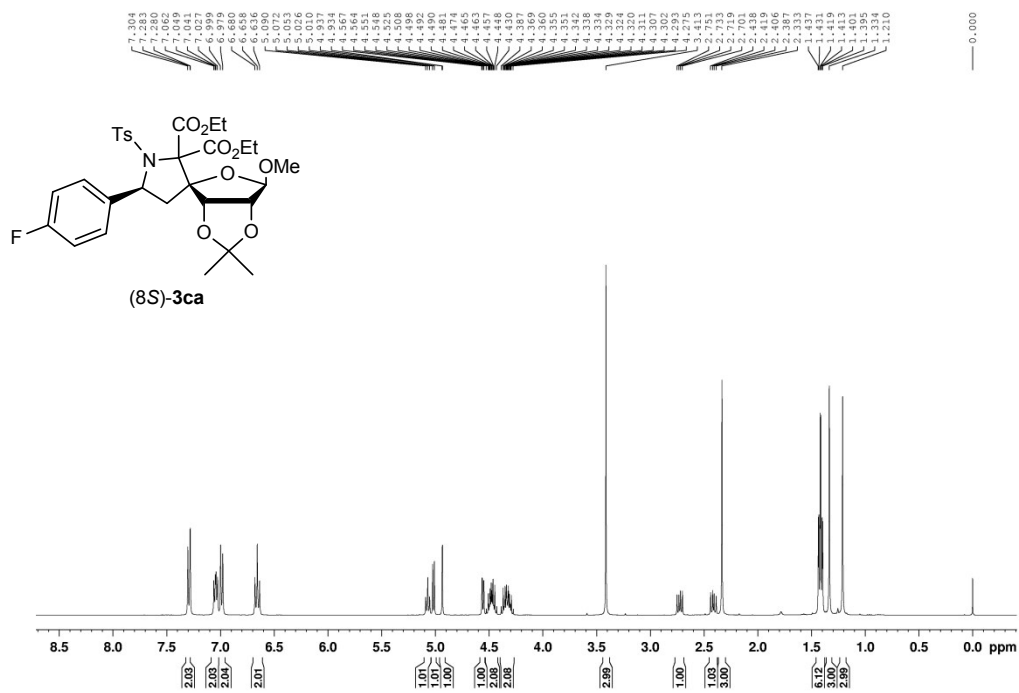

**<sup>13</sup>C-NMR (100 MHz, CDCl<sub>3</sub>) spectra of compound (8*S*)-3ca**

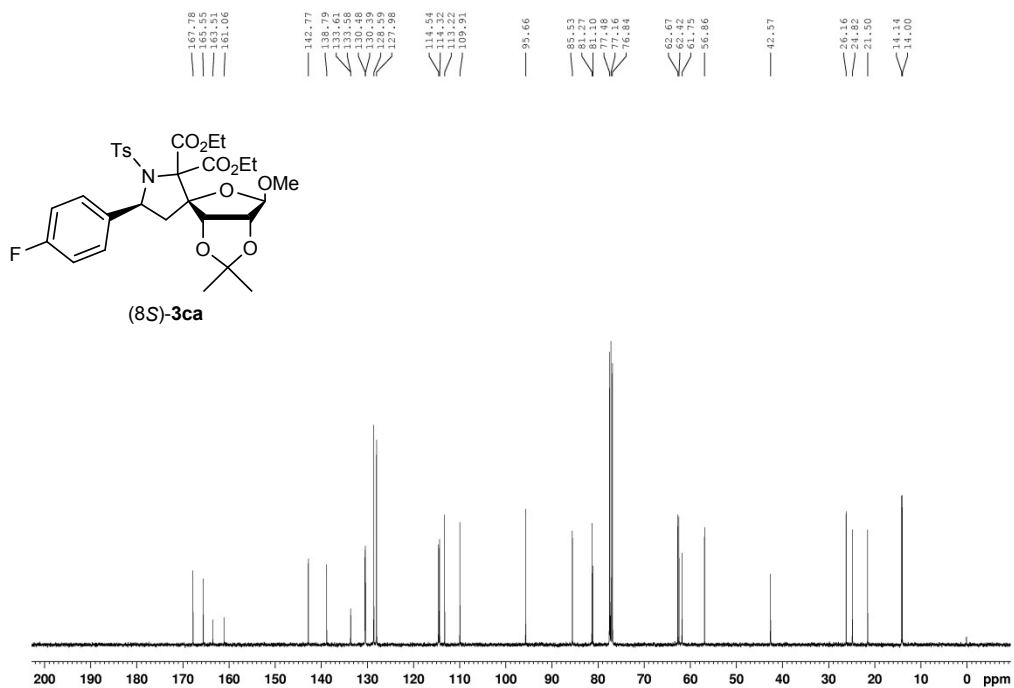

**<sup>19</sup>F-NMR (376 MHz, CDCl<sub>3</sub>) spectra of compound (8*S*)-3ca**

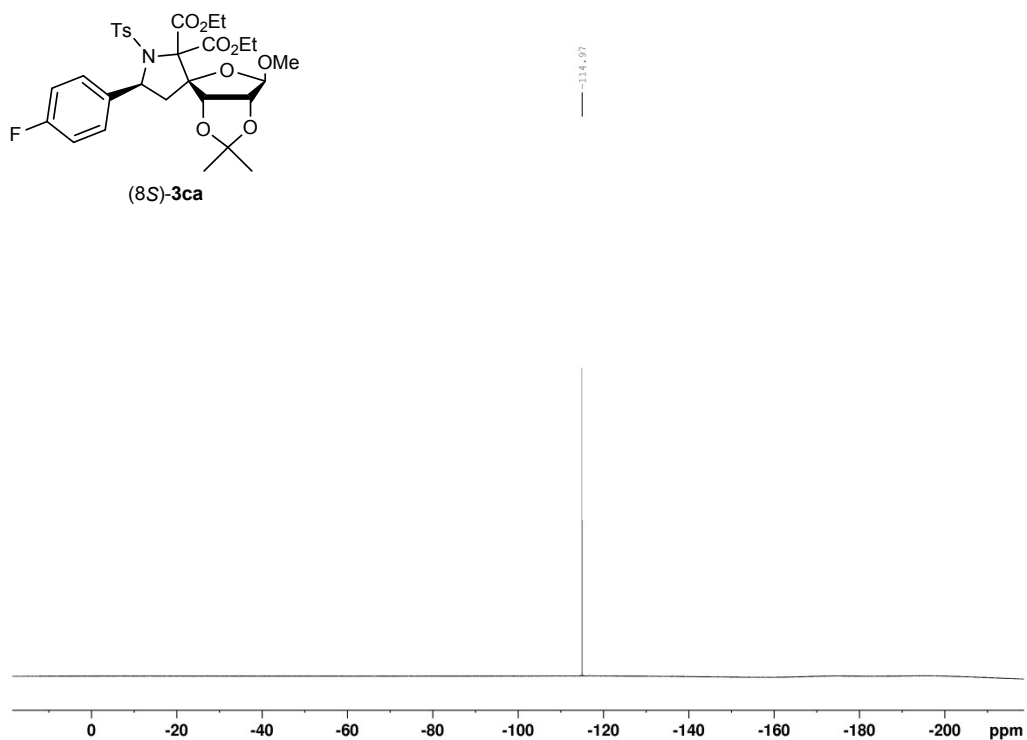

**<sup>1</sup>H-NMR (400 MHz, CDCl<sub>3</sub>) spectra of compound (8*R*)-3da**

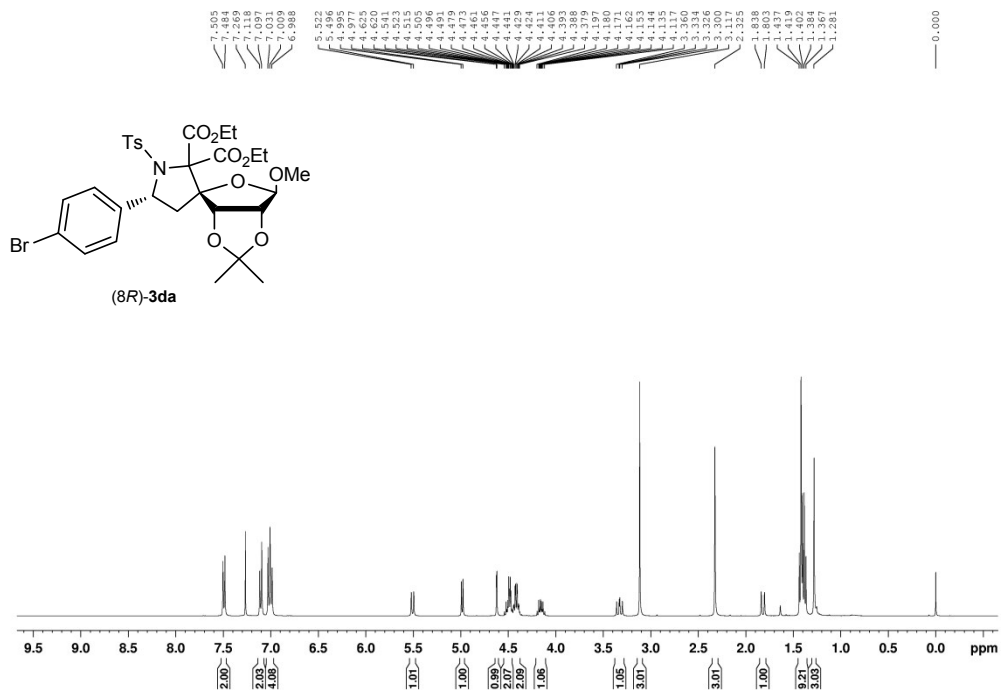

**<sup>13</sup>C-NMR (100 MHz, CDCl<sub>3</sub>) spectra of compound (8*R*)-3da**

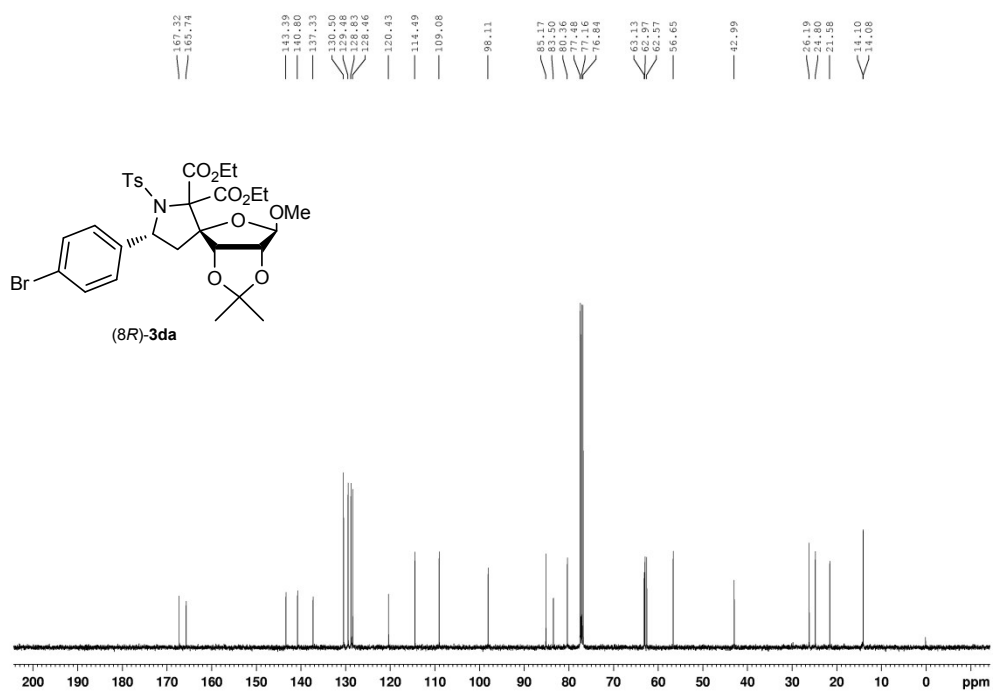

**<sup>1</sup>H-NMR (400 MHz, CDCl<sub>3</sub>) spectra of compound (8*S*)-3da**

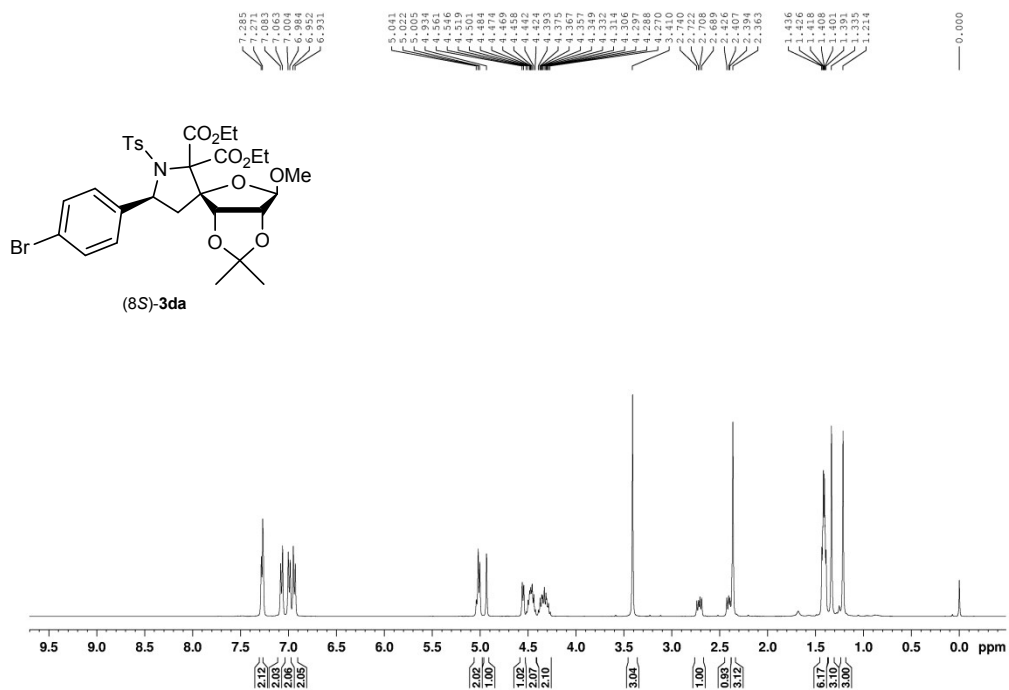

**<sup>13</sup>C-NMR (100 MHz, CDCl<sub>3</sub>) spectra of compound (8*S*)-3da**

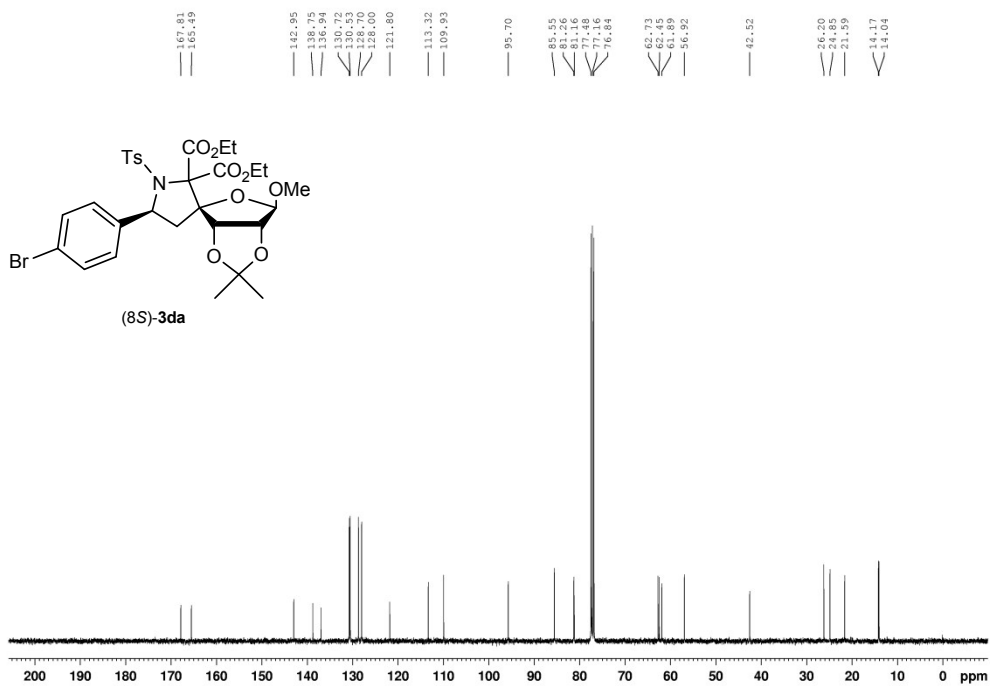

**<sup>1</sup>H-NMR (400 MHz, CDCl<sub>3</sub>) spectra of compound (8R)-3ea**

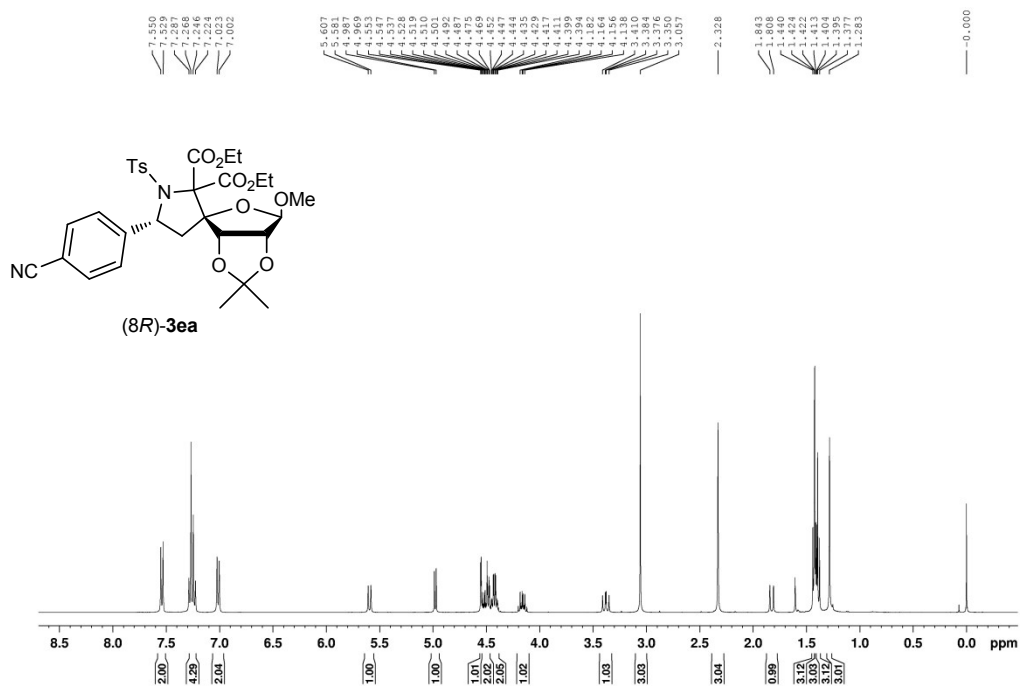

**<sup>13</sup>C-NMR (100 MHz, CDCl<sub>3</sub>) spectra of compound (8R)-3ea**

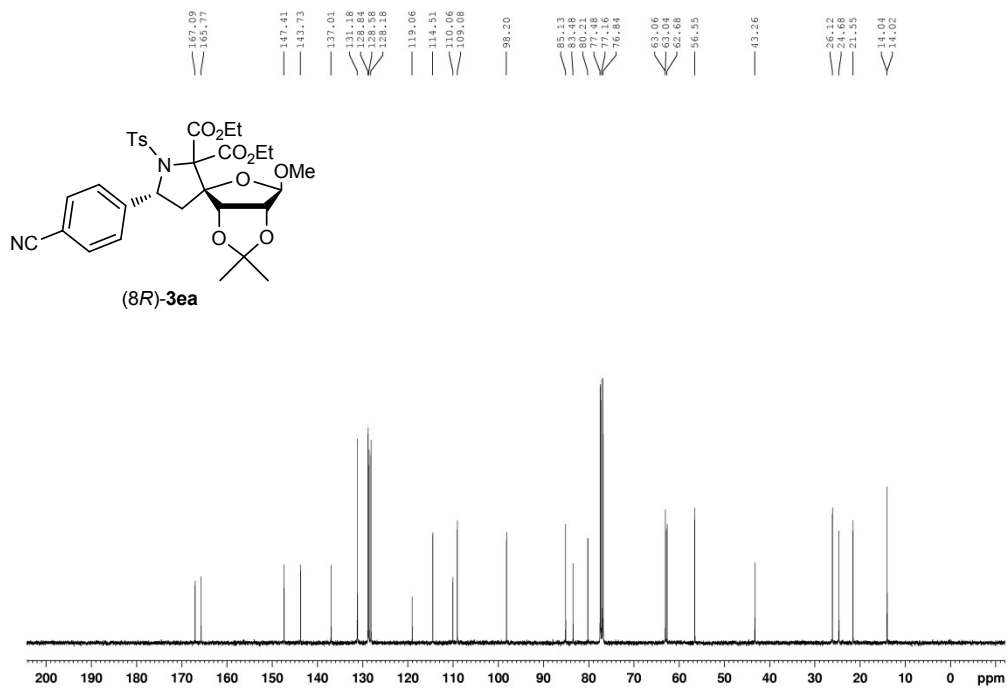



### $^1\text{H-NMR}$ (400 MHz, $\text{CDCl}_3$ ) spectra of compound (8*R*)-3fa

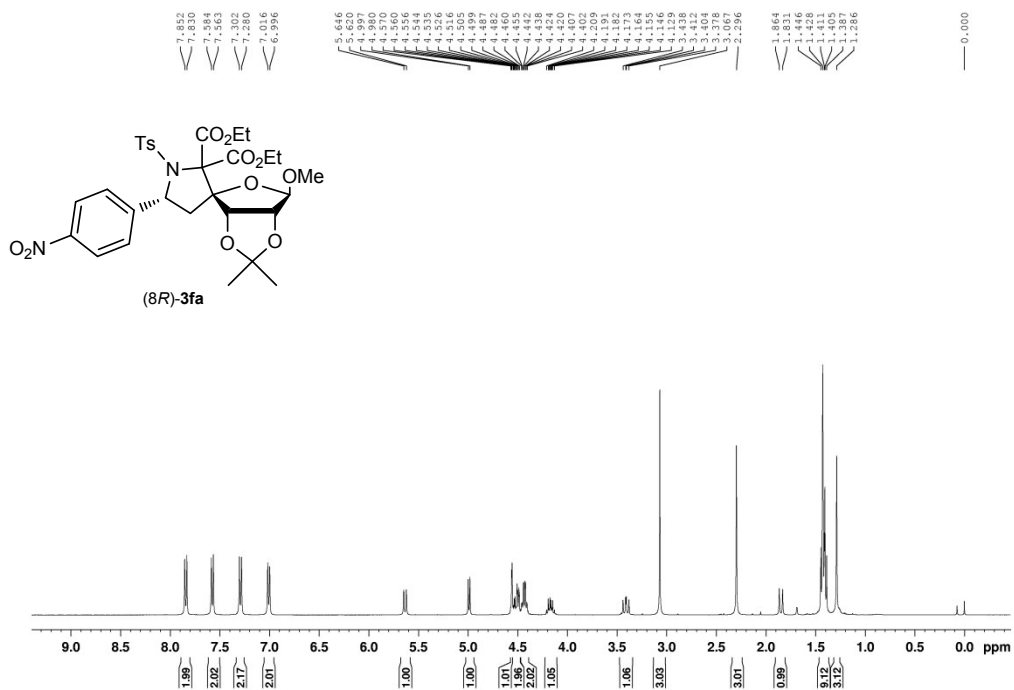

### $^{13}\text{C-NMR}$ (100 MHz, $\text{CDCl}_3$ ) spectra of compound (8*R*)-3fa

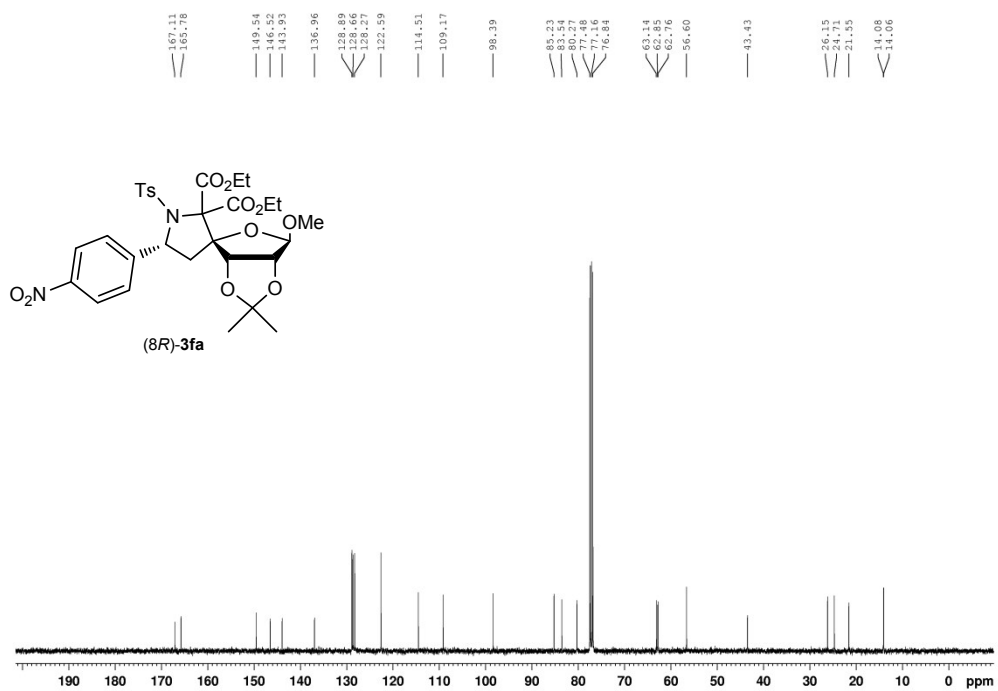







**<sup>19</sup>F-NMR (100 MHz, CDCl<sub>3</sub>) spectra of compound (8*R*)-3ga**

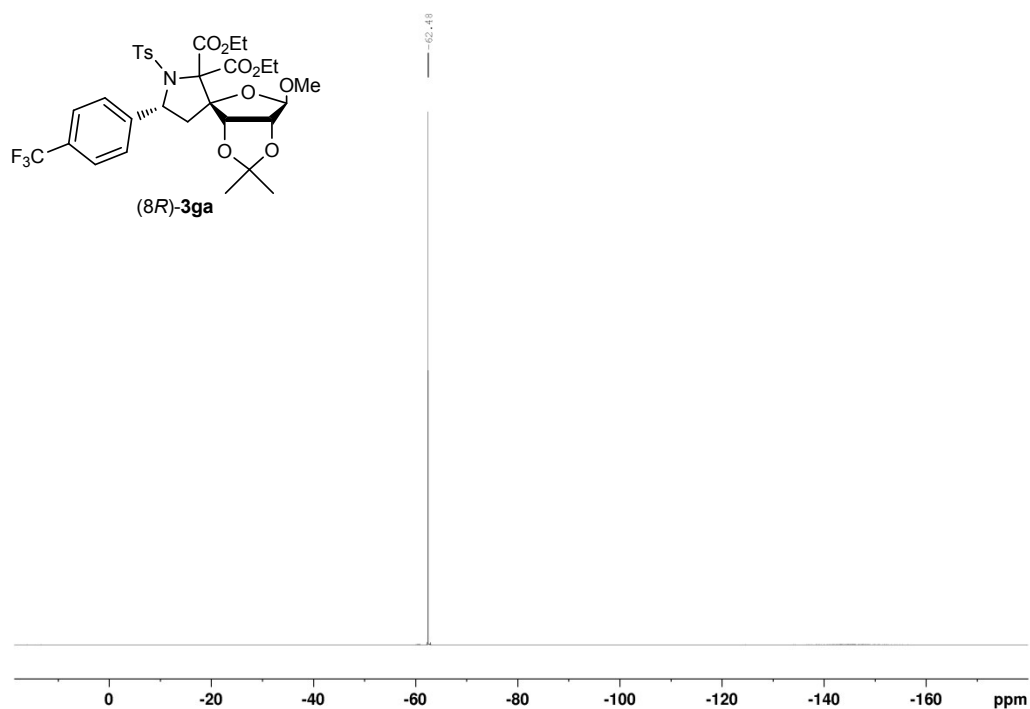

**<sup>1</sup>H-NMR (400 MHz, CDCl<sub>3</sub>) spectra of compound (8*S*)-3ga**

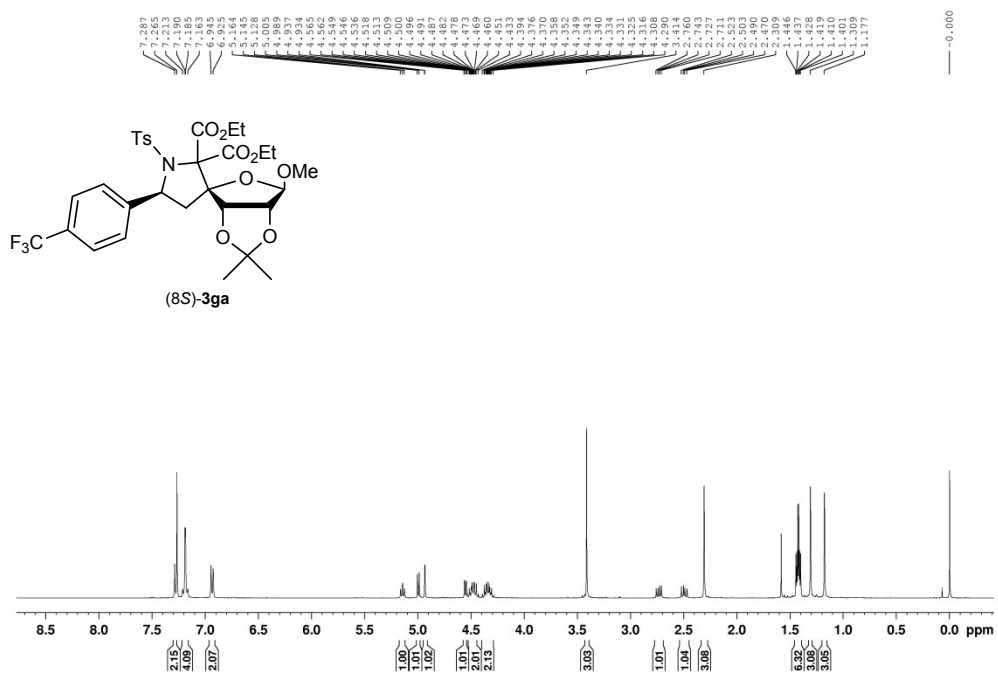

### <sup>13</sup>C-NMR (100 MHz, CDCl<sub>3</sub>) spectra of compound (8*S*)-3ga

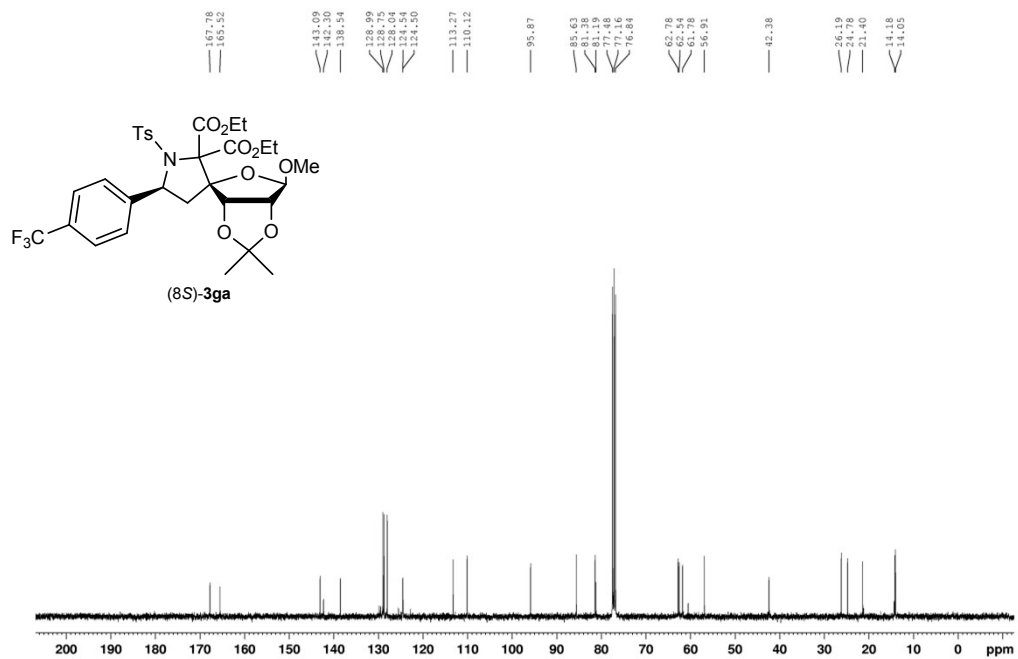

### <sup>19</sup>F-NMR (100 MHz, CDCl<sub>3</sub>) spectra of compound (8*S*)-3ga

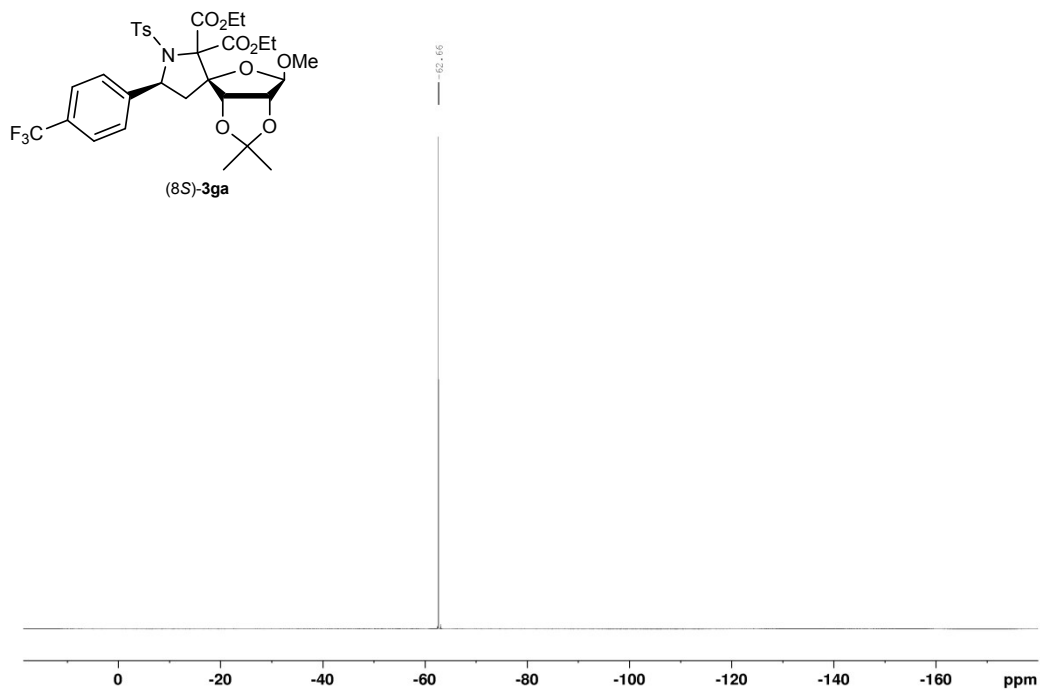

x

**<sup>1</sup>H-NMR (400 MHz, CDCl<sub>3</sub>) spectra of compound (8*R*)-3ha**

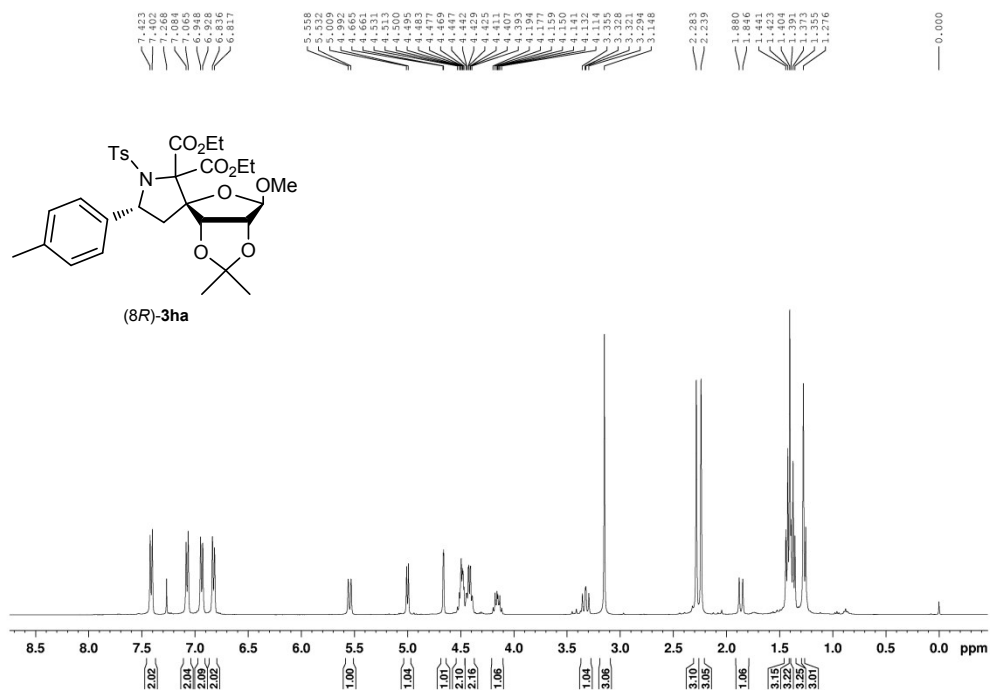

**<sup>13</sup>C-NMR (100 MHz, CDCl<sub>3</sub>) spectra of compound (8*R*)-3ha**

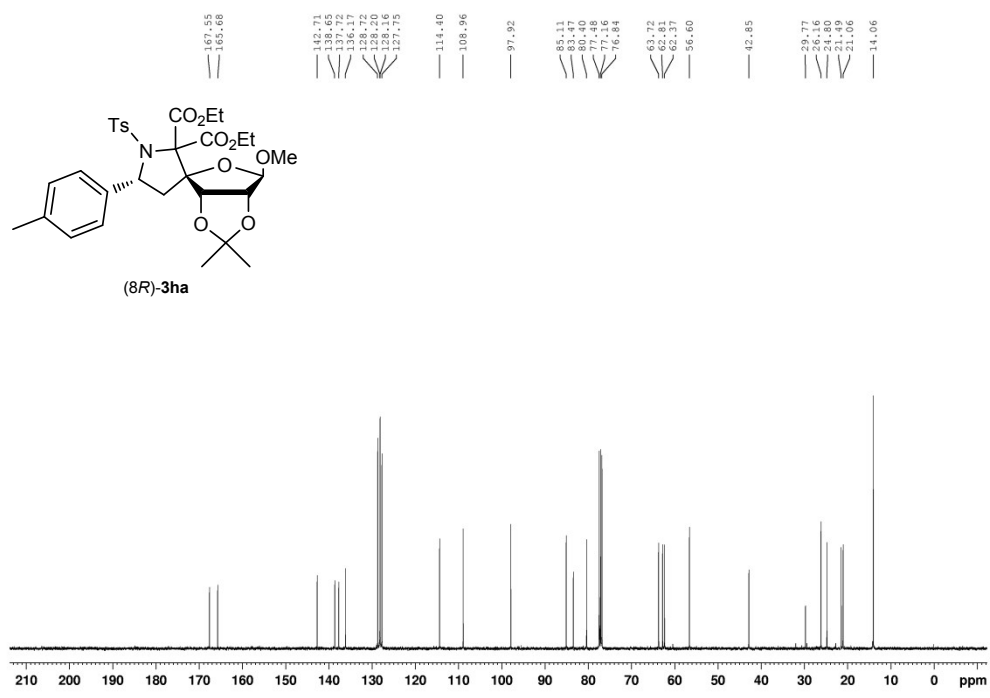

**<sup>1</sup>H-NMR (400 MHz, CDCl<sub>3</sub>) spectra of compound (8S)-3ha**

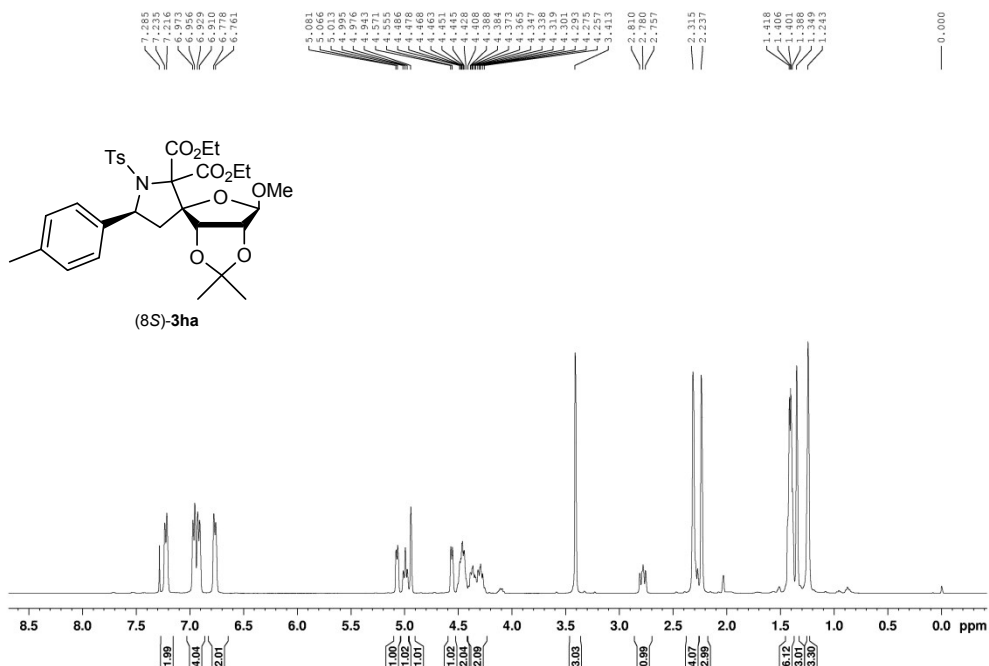

**<sup>13</sup>C-NMR (100 MHz, CDCl<sub>3</sub>) spectra of compound (8S)-3ha**

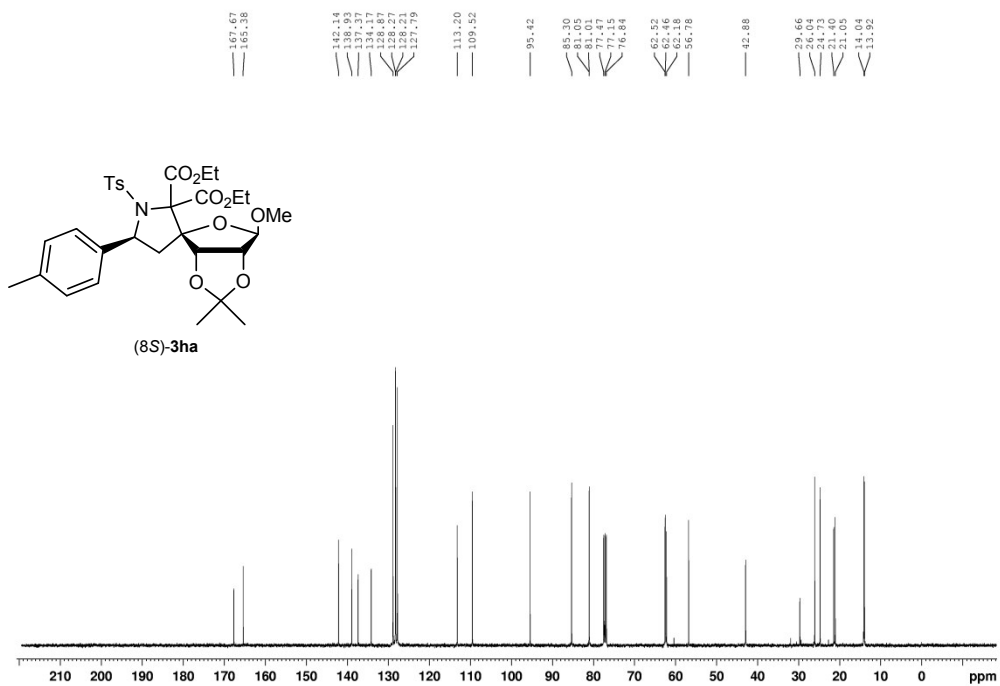

### <sup>1</sup>H-NMR (400 MHz, CDCl<sub>3</sub>) spectra of compound (8R)-3ia

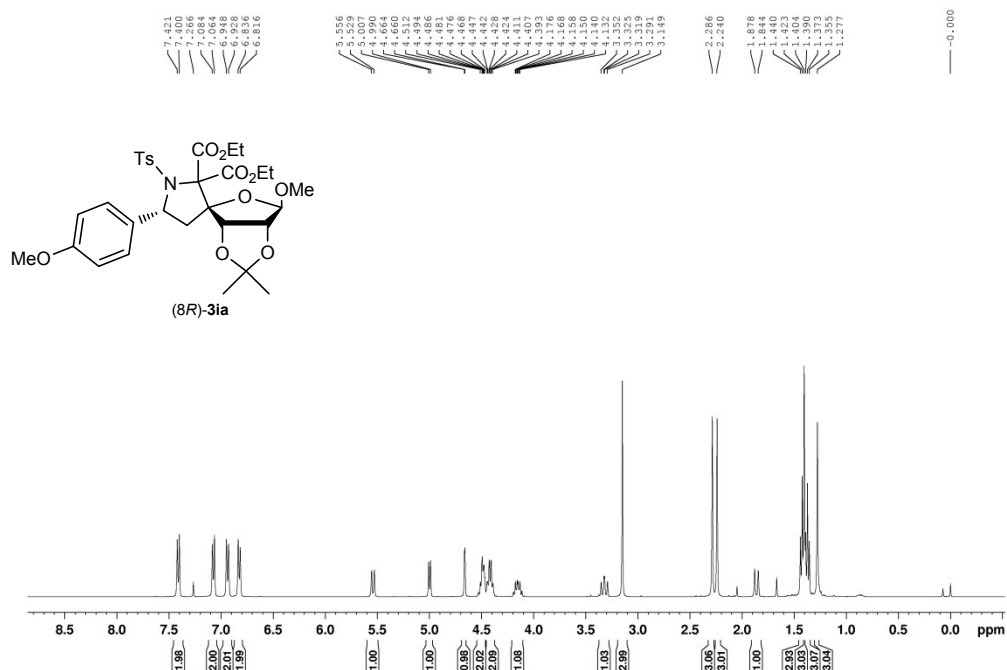

### <sup>13</sup>C-NMR (100 MHz, CDCl<sub>3</sub>) spectra of compound (8R)-3ia

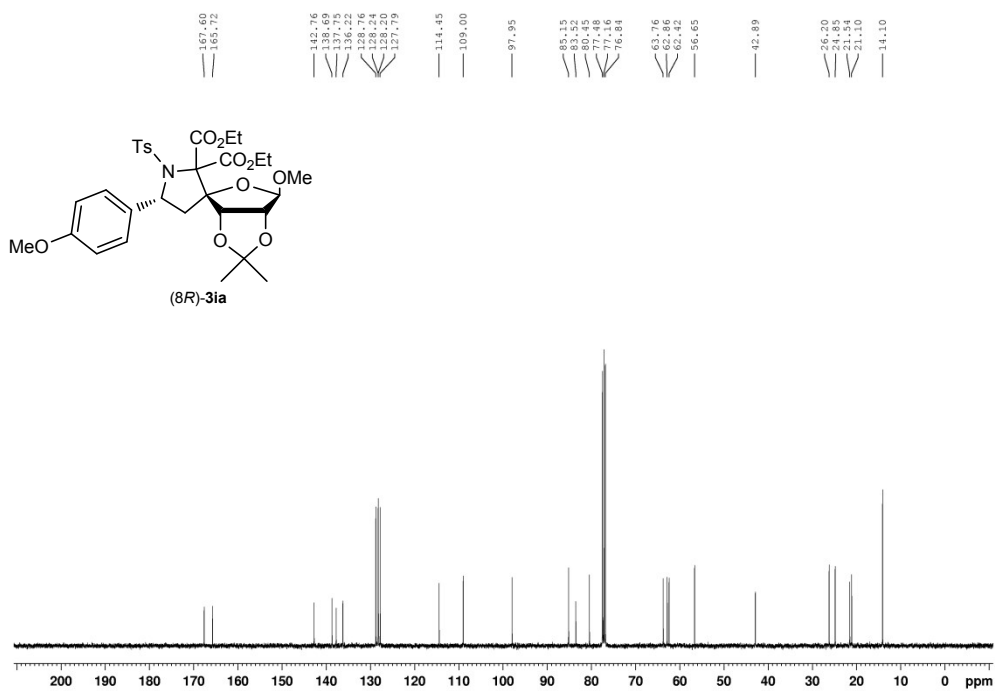





**<sup>1</sup>H-NMR (400 MHz, CDCl<sub>3</sub>) spectra of compound (8R)-3ja**

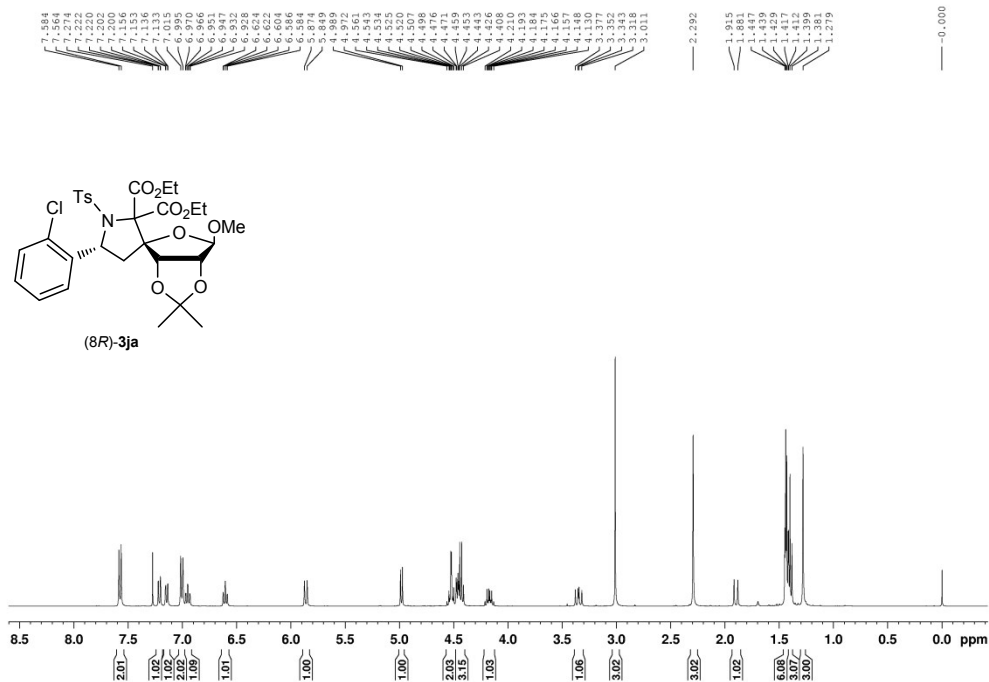

**<sup>13</sup>C-NMR (100 MHz, CDCl<sub>3</sub>) spectra of compound (8R)-3ja**

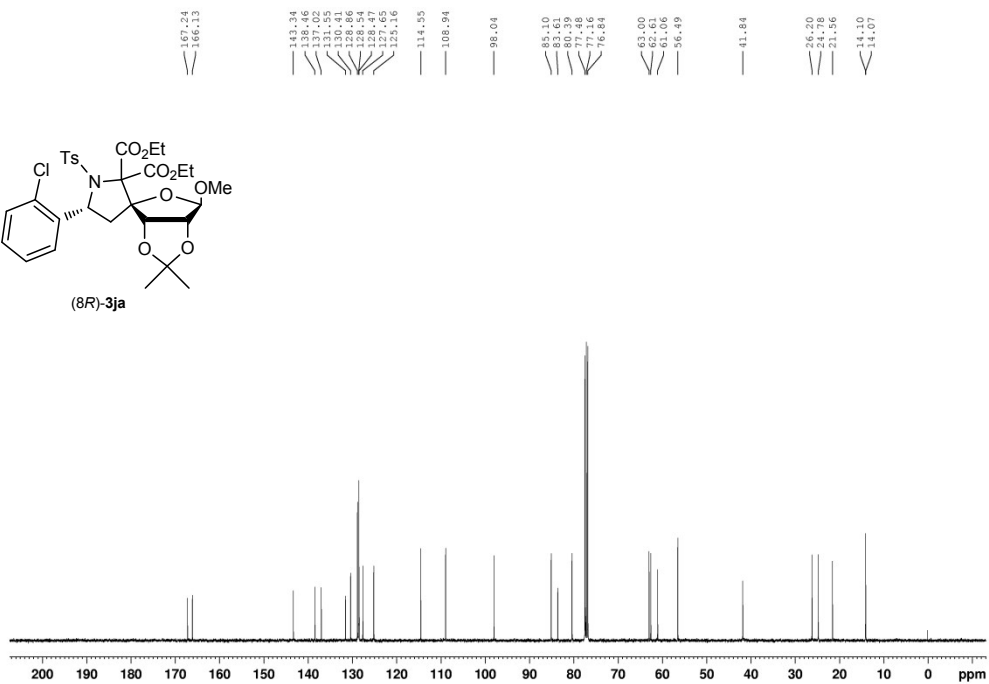

**<sup>1</sup>H-NMR (400 MHz, CDCl<sub>3</sub>) spectra of compound (8S)-3ja**

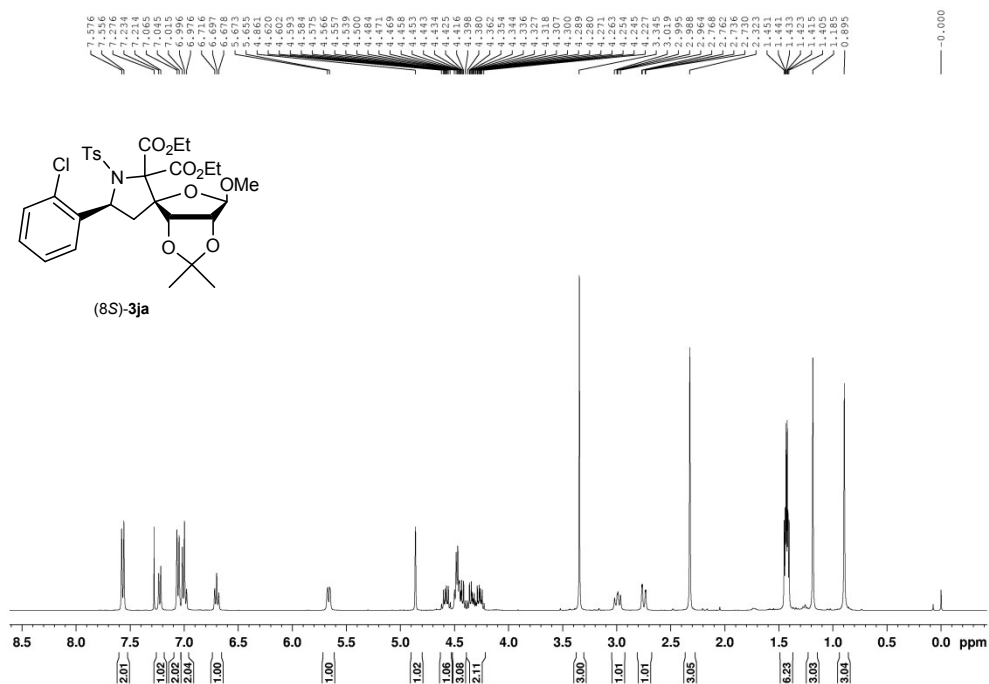

**<sup>13</sup>C-NMR (100 MHz, CDCl<sub>3</sub>) spectra of compound (8S)-3ja**

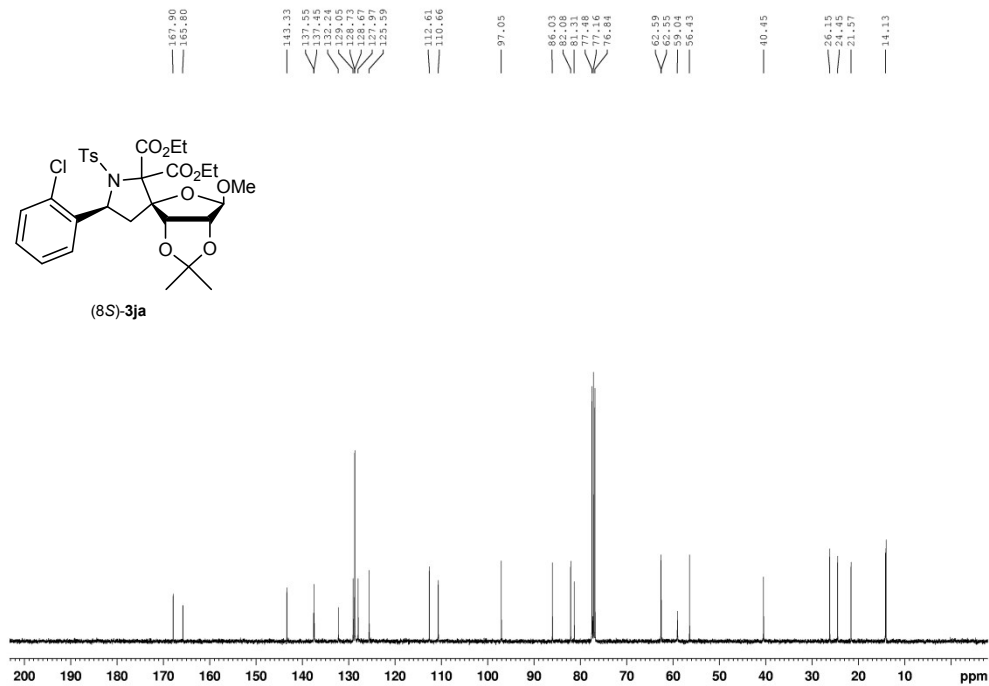

**<sup>1</sup>H-NMR (400 MHz, CDCl<sub>3</sub>) spectra of compound (8R)-3ka**

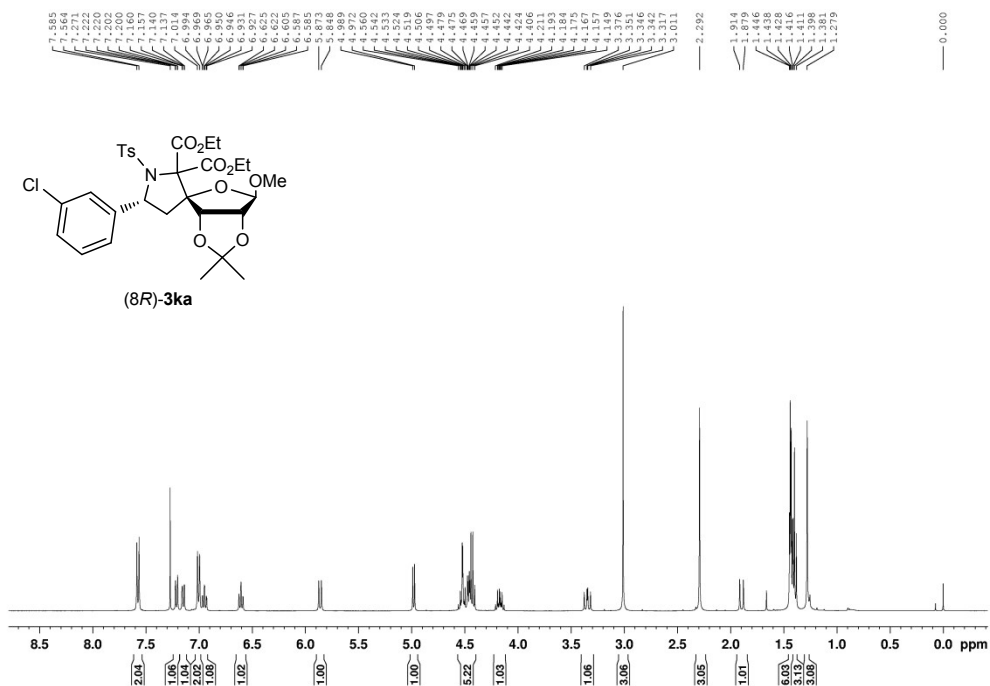

**<sup>13</sup>C-NMR (100 MHz, CDCl<sub>3</sub>) spectra of compound (8R)-3ka**

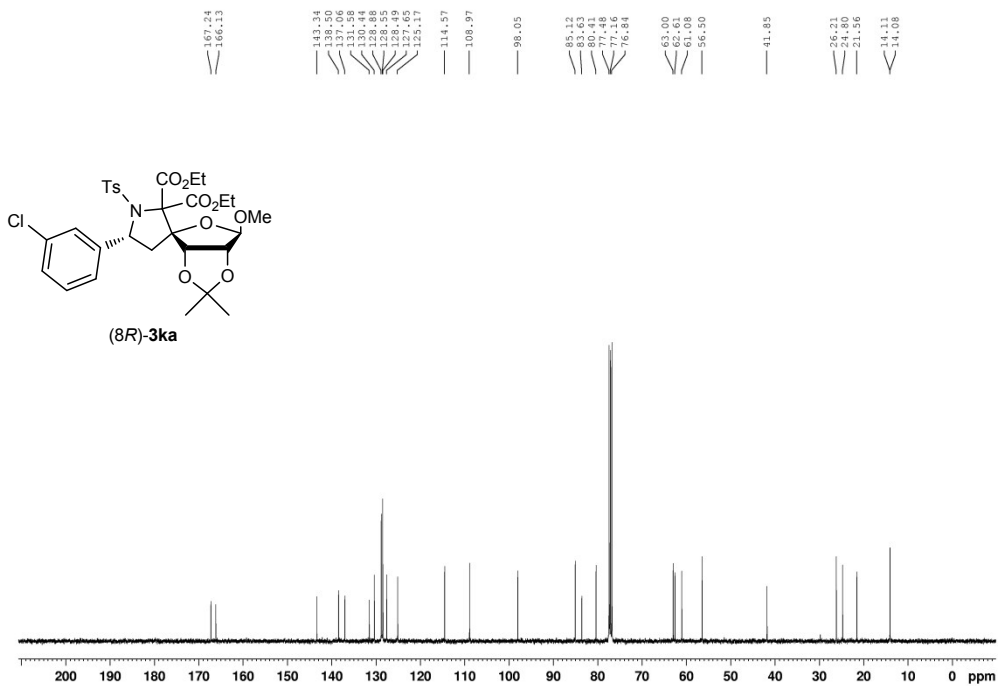



**<sup>1</sup>H-NMR (400 MHz, CDCl<sub>3</sub>) spectra of compound (8*R*)-3la**

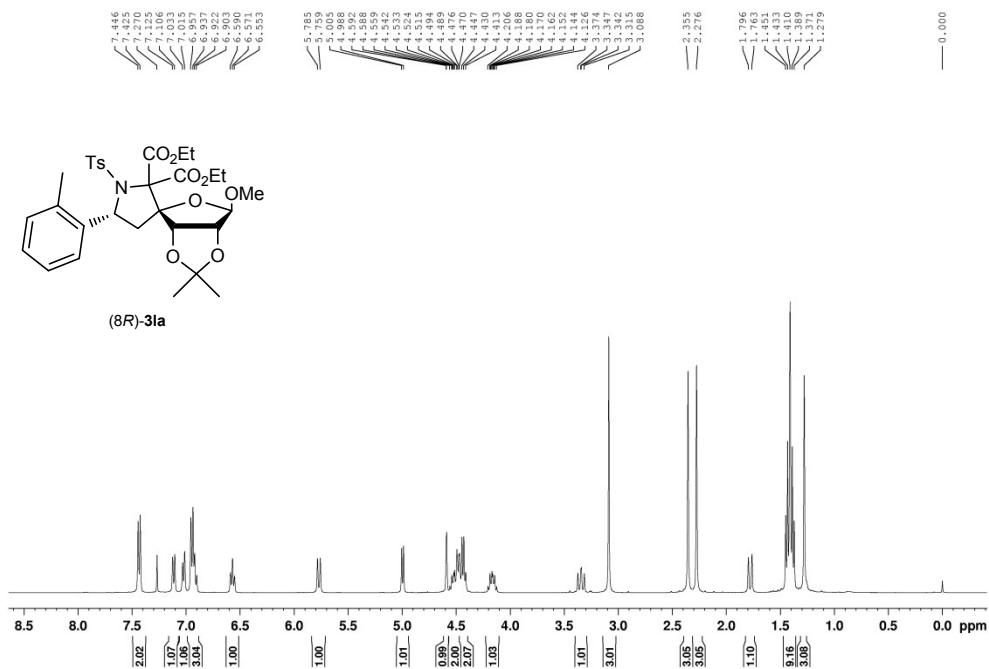

**<sup>13</sup>C-NMR (100 MHz, CDCl<sub>3</sub>) spectra of compound (8*R*)-3la**

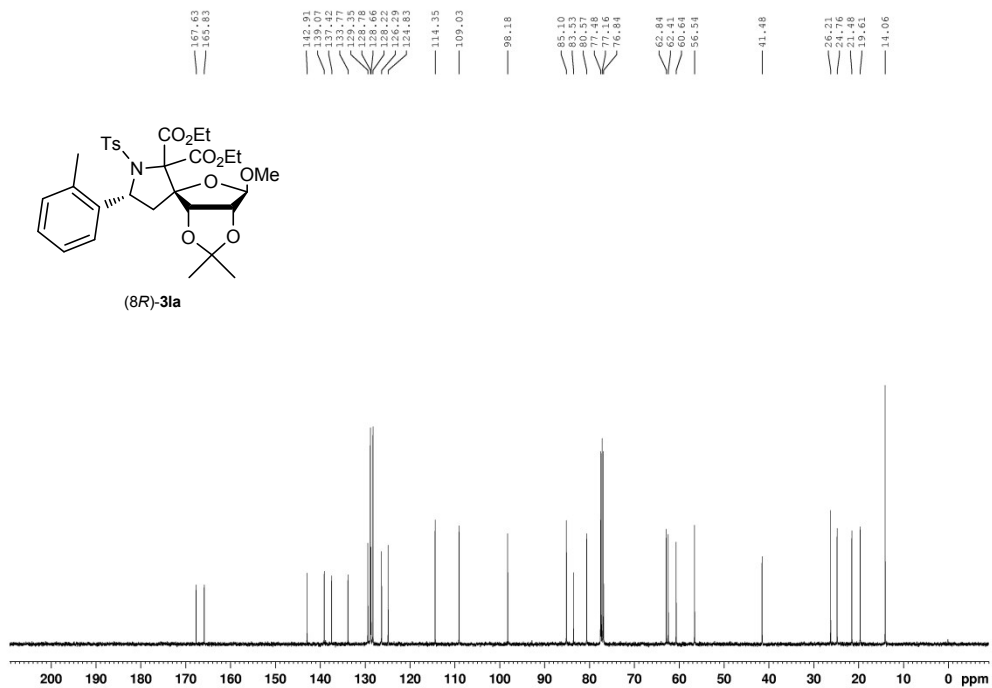

**<sup>1</sup>H-NMR (400 MHz, CDCl<sub>3</sub>) spectra of compound (8S)-3la**

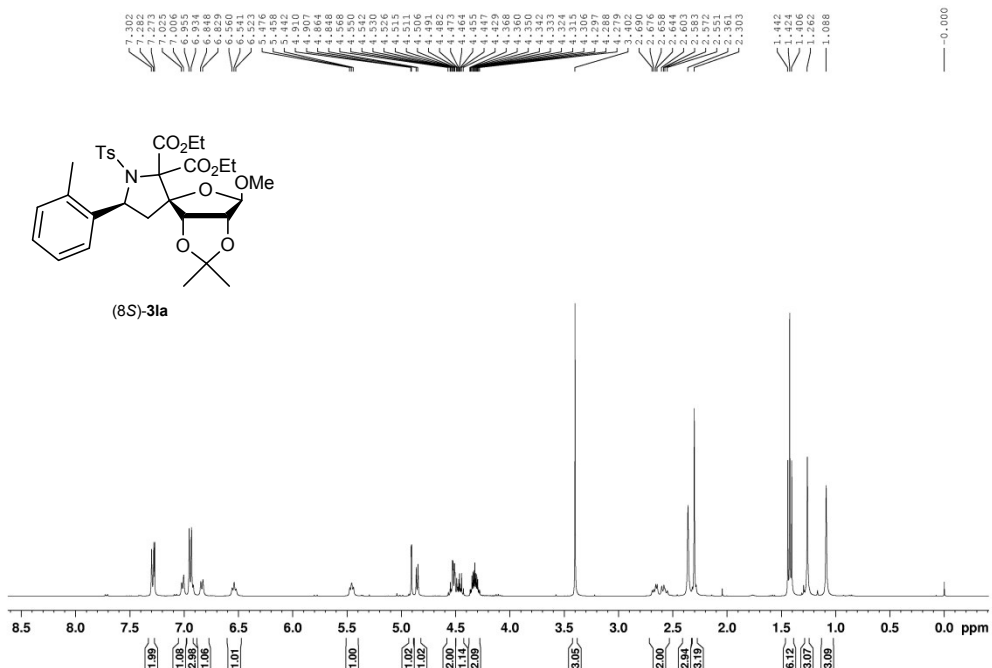

**<sup>13</sup>C-NMR (100 MHz, CDCl<sub>3</sub>) spectra of compound (8S)-3la**

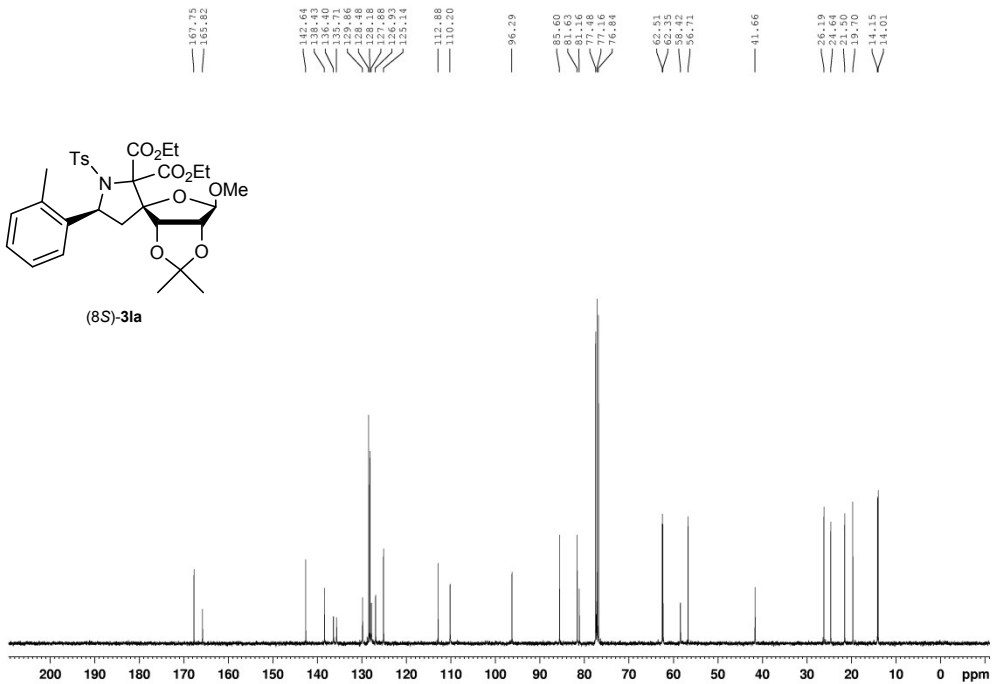



**<sup>1</sup>H-NMR (400 MHz, CDCl<sub>3</sub>) spectra of compound (8*S*)-3ma**

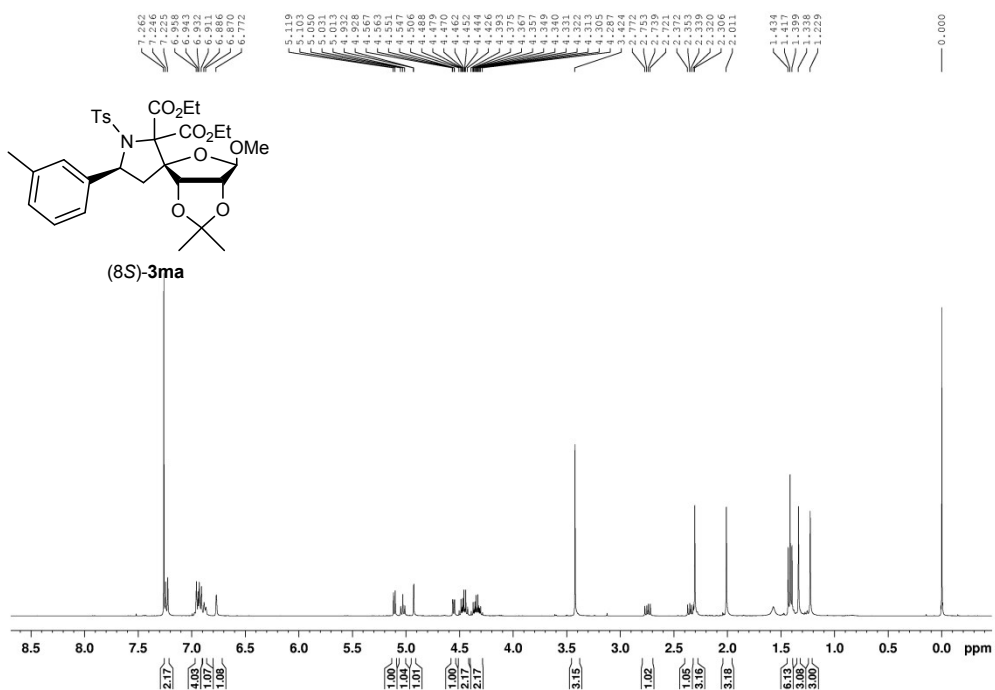





**<sup>1</sup>H-NMR (400 MHz, CDCl<sub>3</sub>) spectra of compound (8*S*)-3na**

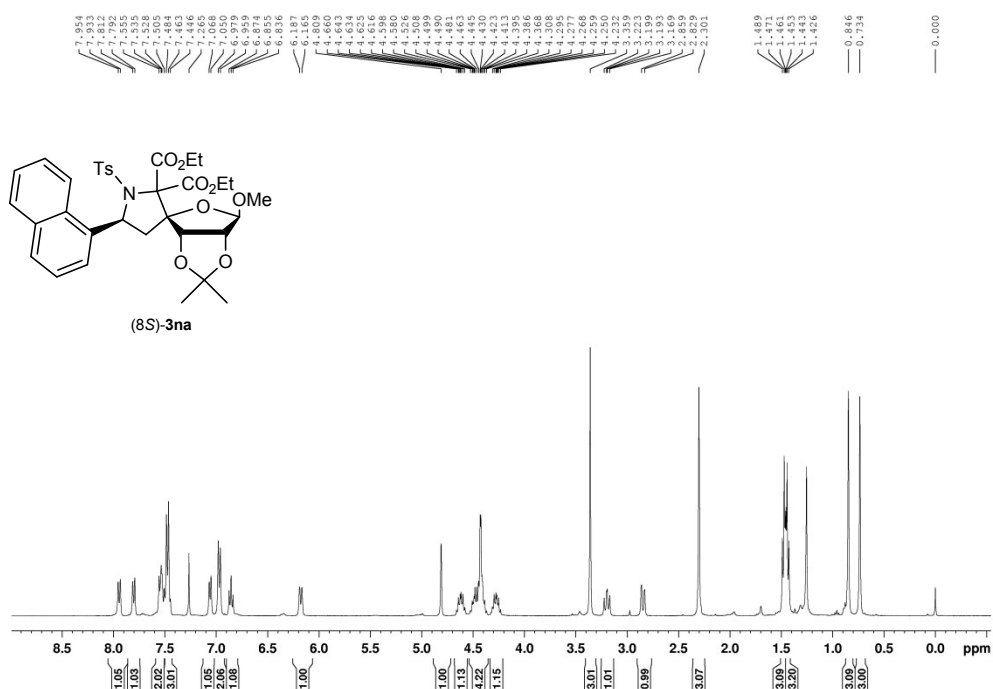

**<sup>13</sup>C-NMR (100 MHz, CDCl<sub>3</sub>) spectra of compound (8*S*)-3na**

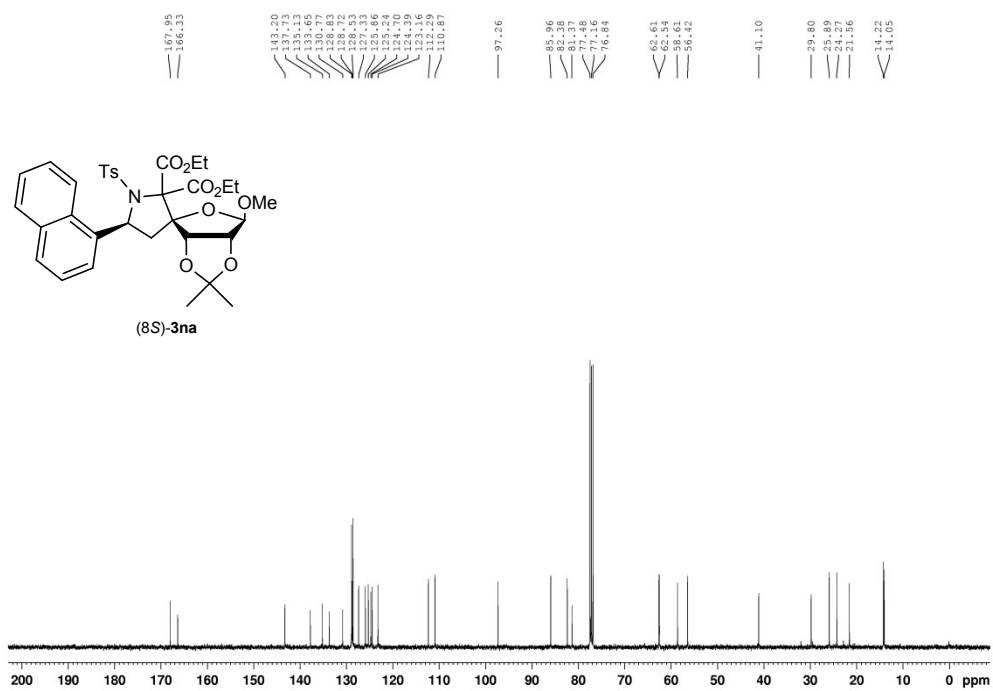

### <sup>1</sup>H-NMR (400 MHz, CDCl<sub>3</sub>) spectra of compound (8R)-3oa

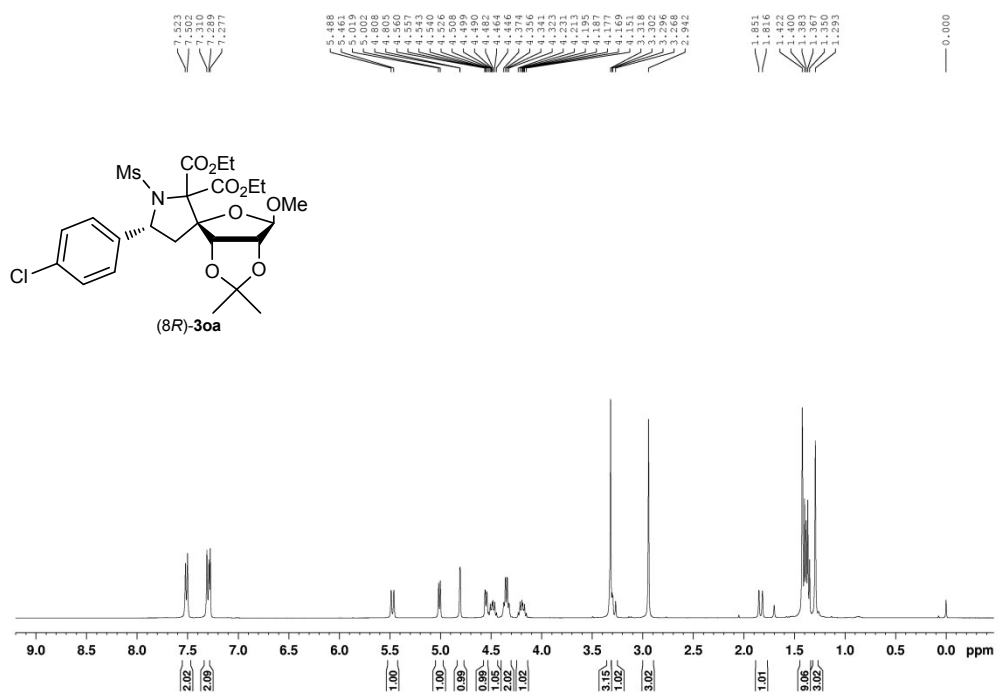

### <sup>13</sup>C-NMR (100 MHz, CDCl<sub>3</sub>) spectra of compound (8R)-3oa

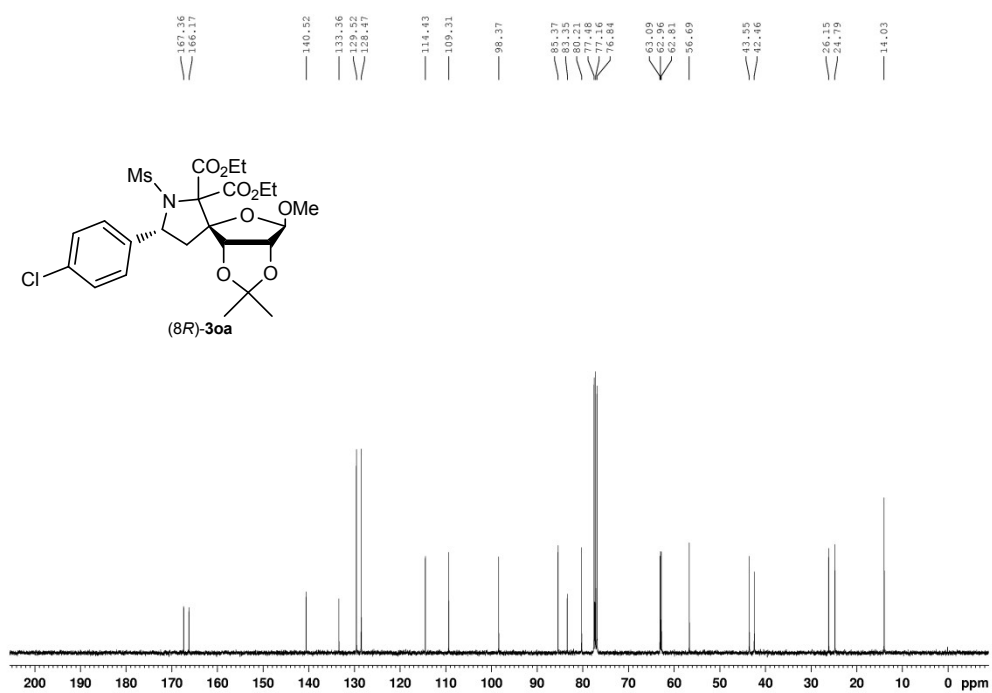

### <sup>1</sup>H-NMR (400 MHz, CDCl<sub>3</sub>) spectra of compound (8*S*)-3oa

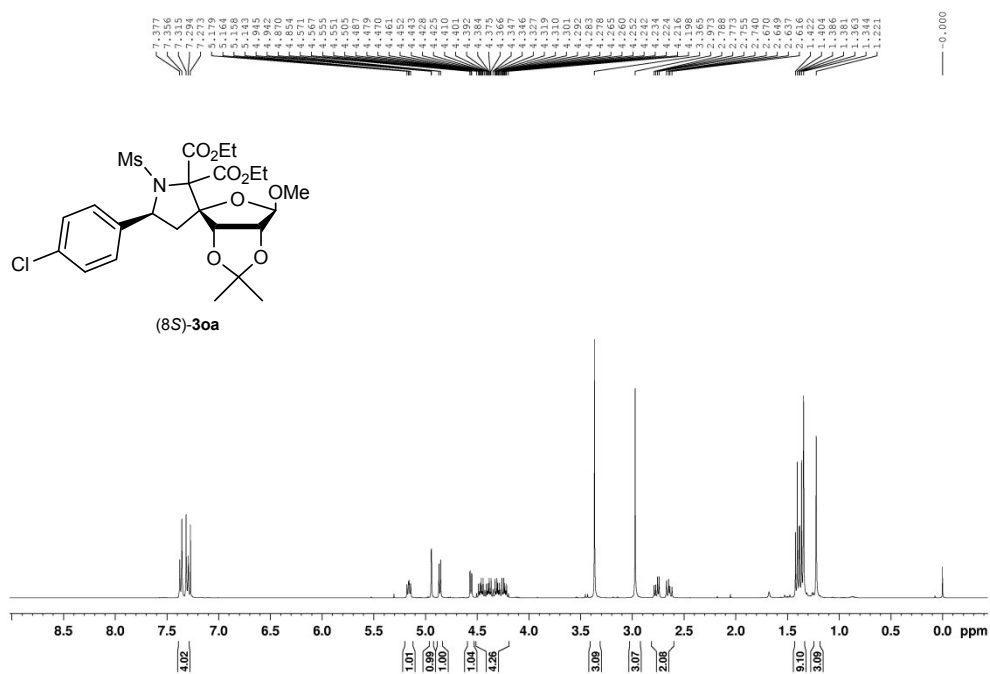

### <sup>13</sup>C-NMR (100 MHz, CDCl<sub>3</sub>) spectra of compound (8*S*)-3oa

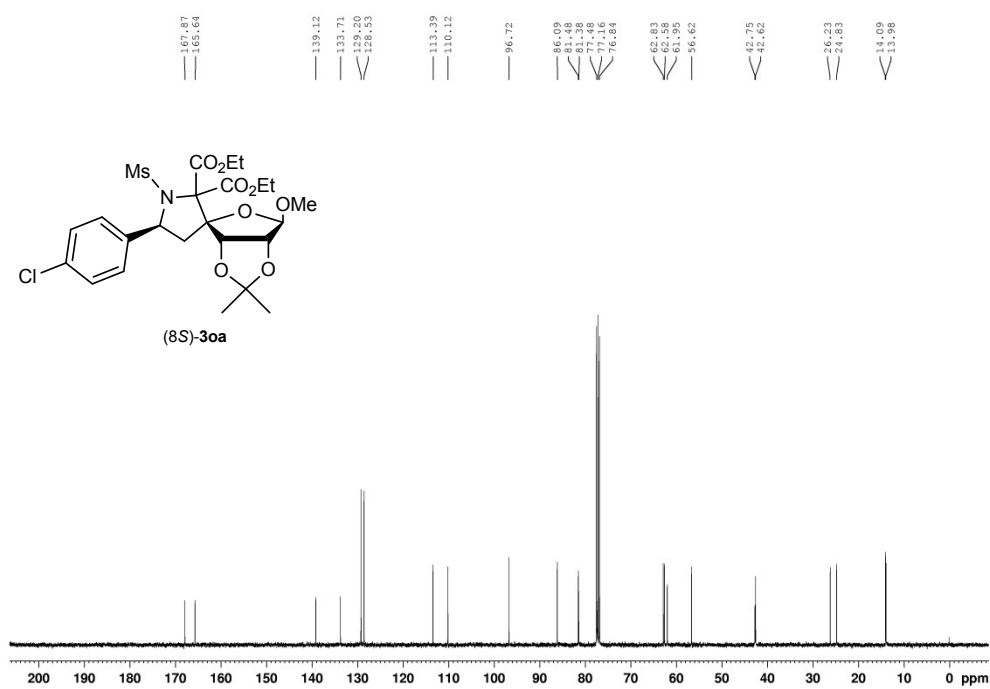

### <sup>1</sup>H-NMR (400 MHz, CDCl<sub>3</sub>) spectra of compound (8R)-3pa

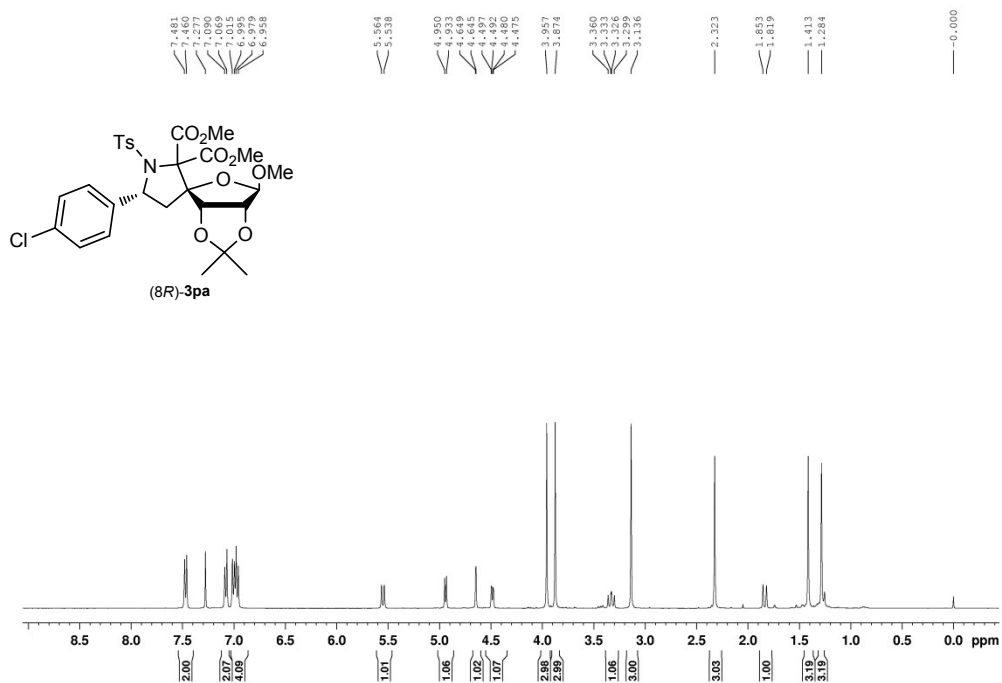

### <sup>13</sup>C-NMR (100 MHz, CDCl<sub>3</sub>) spectra of compound (8R)-3pa

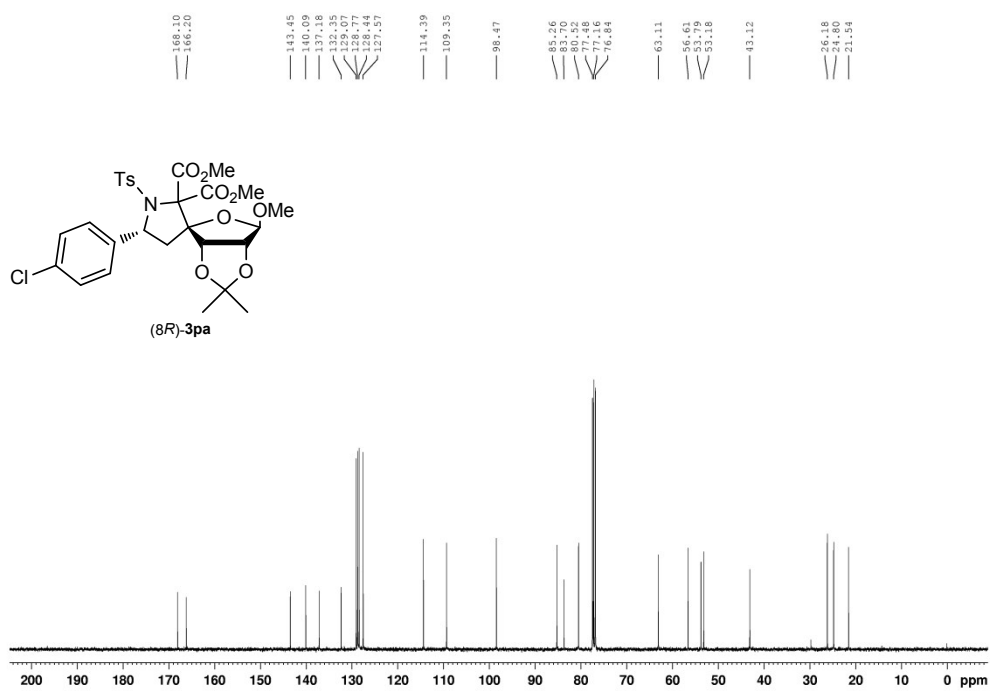

### $^1\text{H-NMR}$ (400 MHz, $\text{CDCl}_3$ ) spectra of compound (8*S*)-3pa

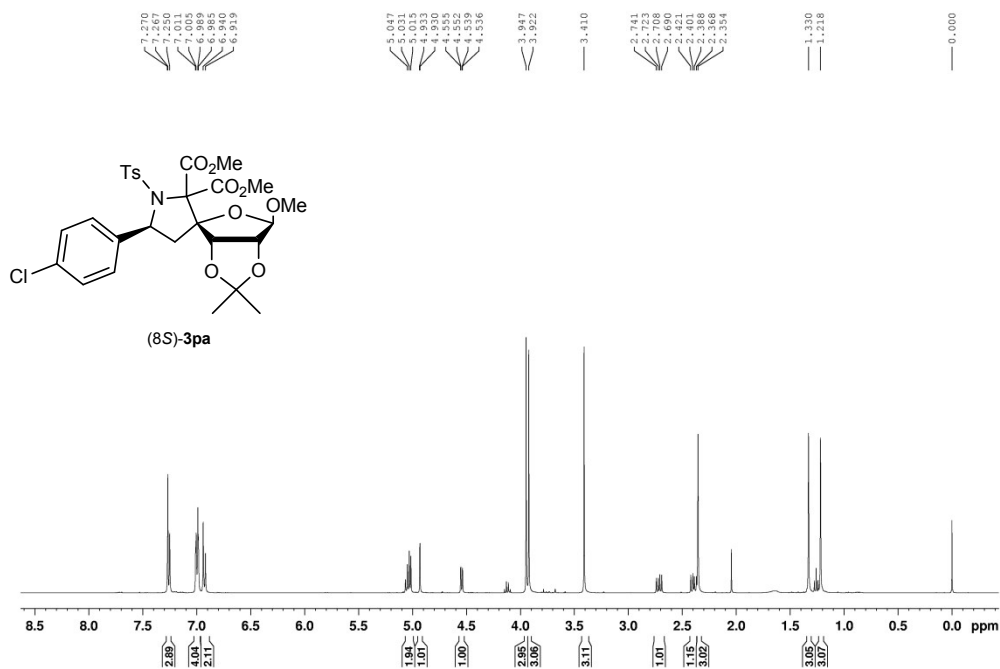

### $^{13}\text{C-NMR}$ (100 MHz, $\text{CDCl}_3$ ) spectra of compound (8*S*)-3pa

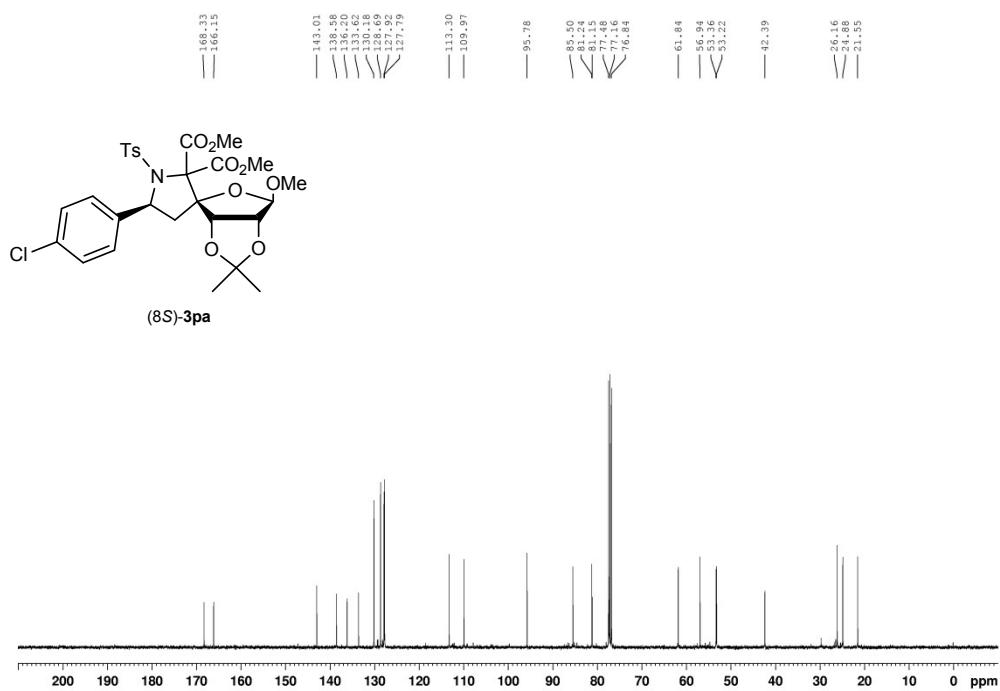

**<sup>1</sup>H-NMR (400 MHz, CDCl<sub>3</sub>) spectra of compound (5R)-5ab**

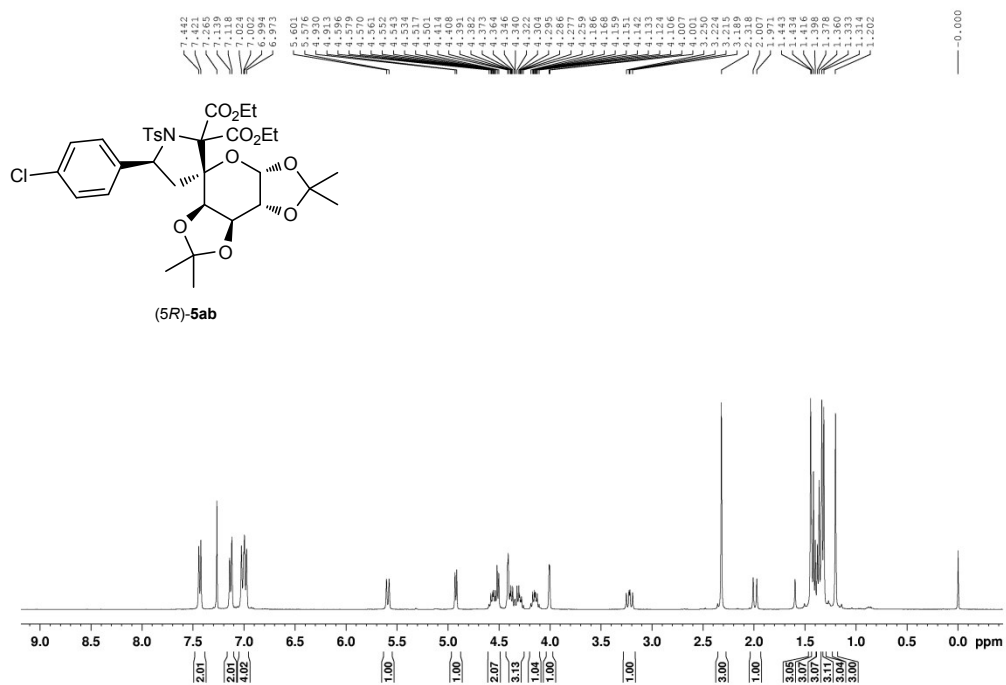

**<sup>13</sup>C-NMR (100 MHz, CDCl<sub>3</sub>) spectra of compound (5R)-5ab**

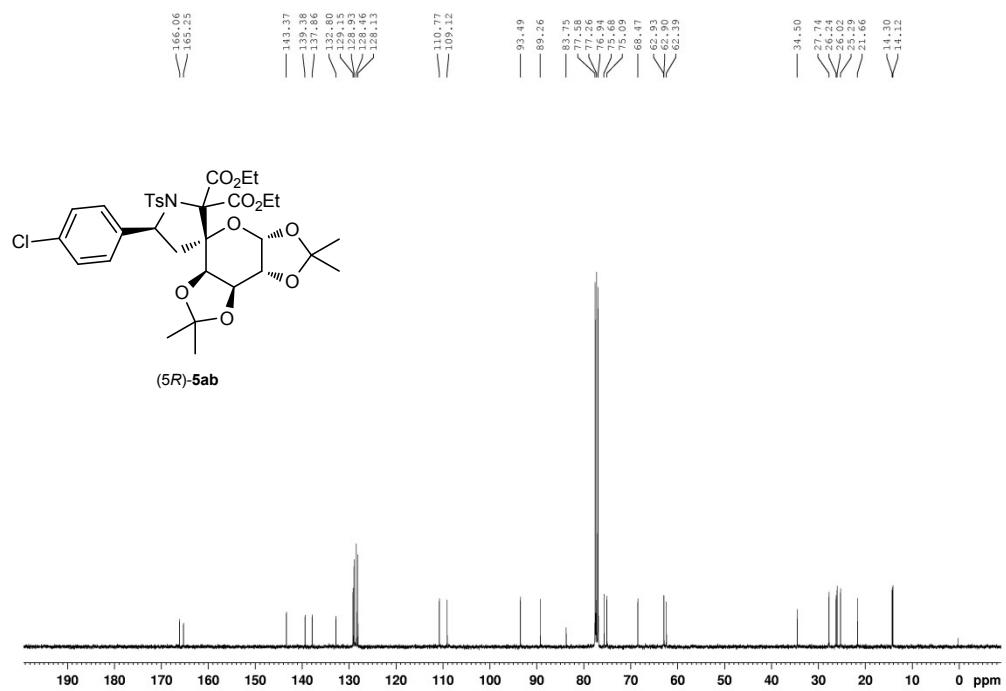

**<sup>1</sup>H-NMR (400 MHz, CDCl<sub>3</sub>) spectra of compound (5*S*)-5ab**

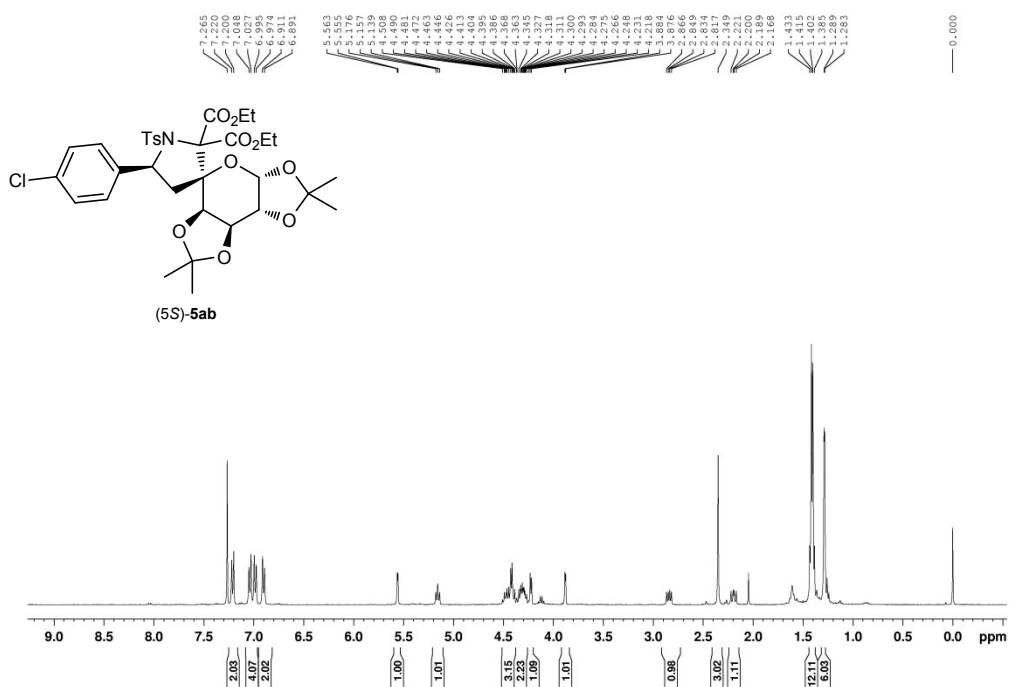

**<sup>13</sup>C-NMR (100 MHz, CDCl<sub>3</sub>) spectra of compound (5*S*)-5ab**

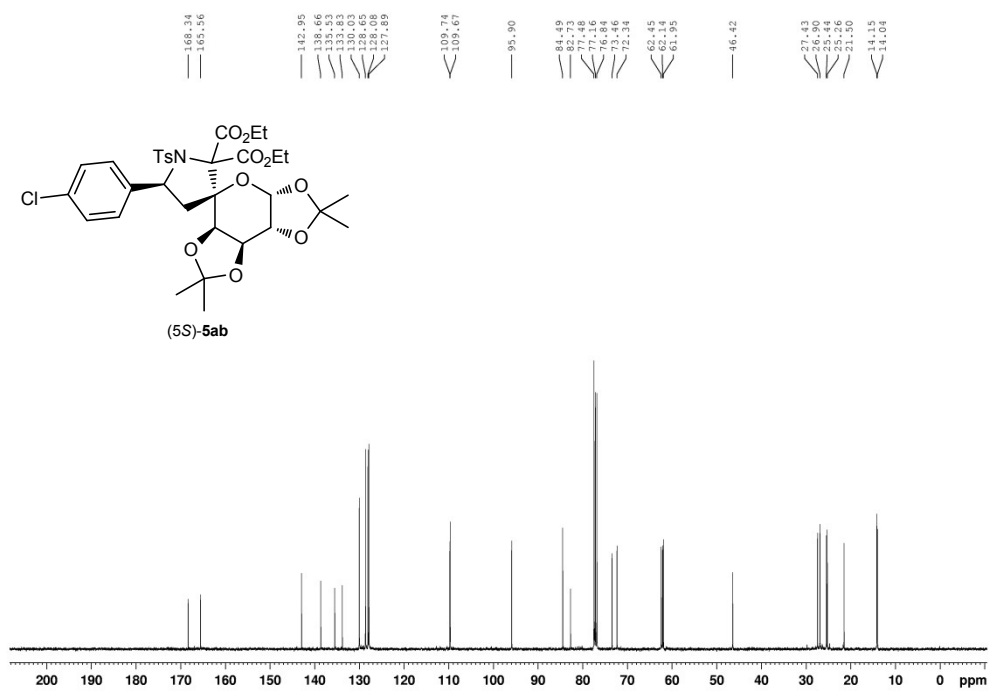





**<sup>1</sup>H-NMR (400 MHz, CDCl<sub>3</sub>) spectra of compound (5*S*)-5bb**

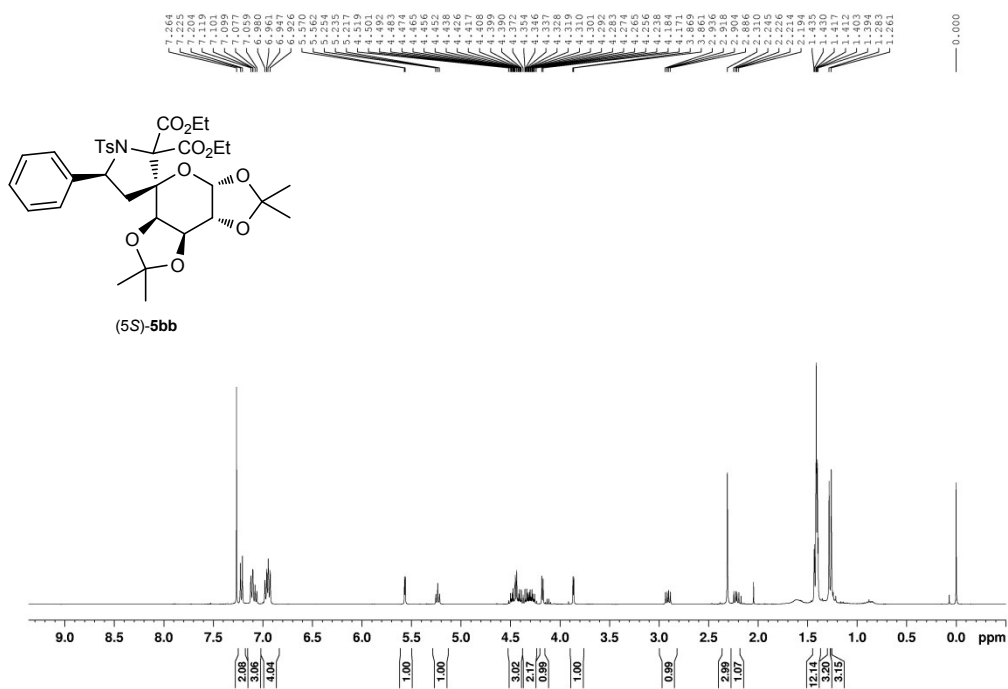

**<sup>13</sup>C-NMR (100 MHz, CDCl<sub>3</sub>) spectra of compound (5*S*)-5bb**

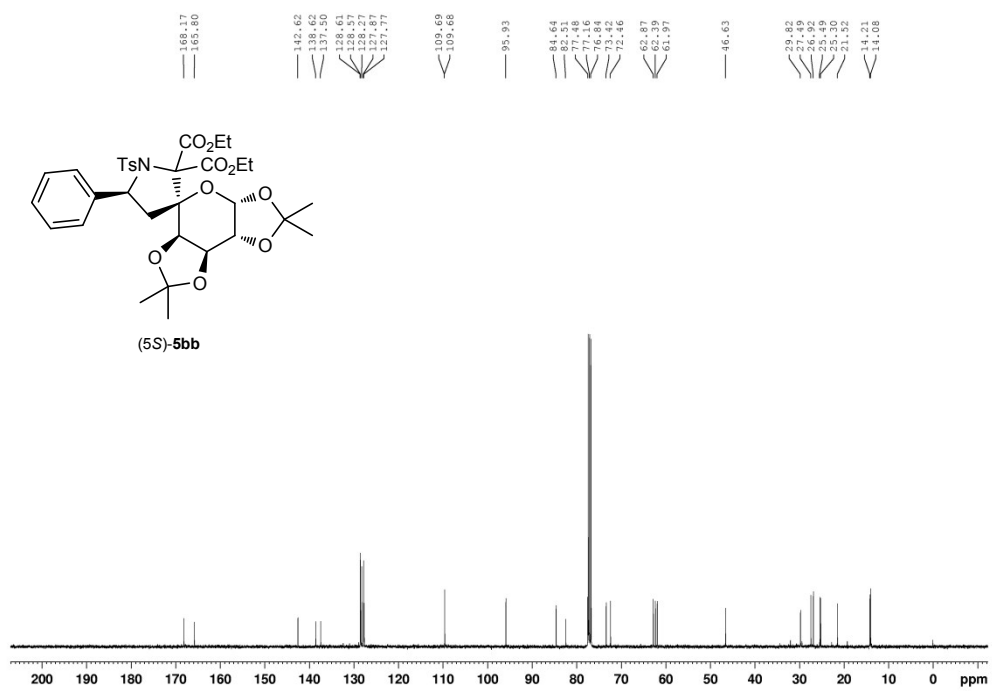

### <sup>1</sup>H-NMR (400 MHz, CDCl<sub>3</sub>) spectra of compound (5R)-5hb

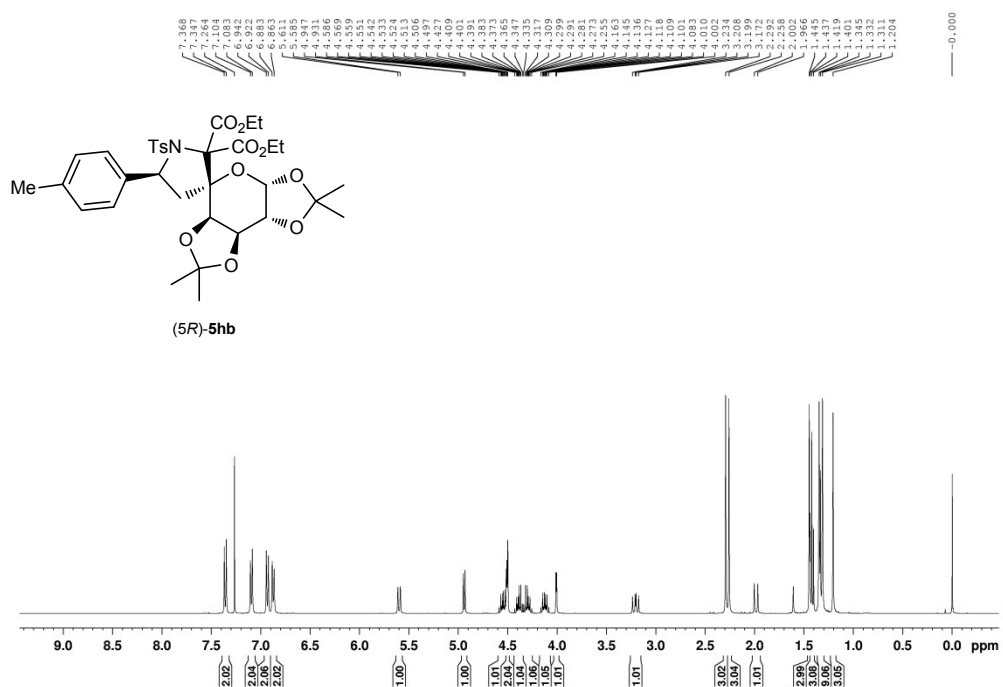

### <sup>13</sup>C-NMR (100 MHz, CDCl<sub>3</sub>) spectra of compound (5R)-5hb

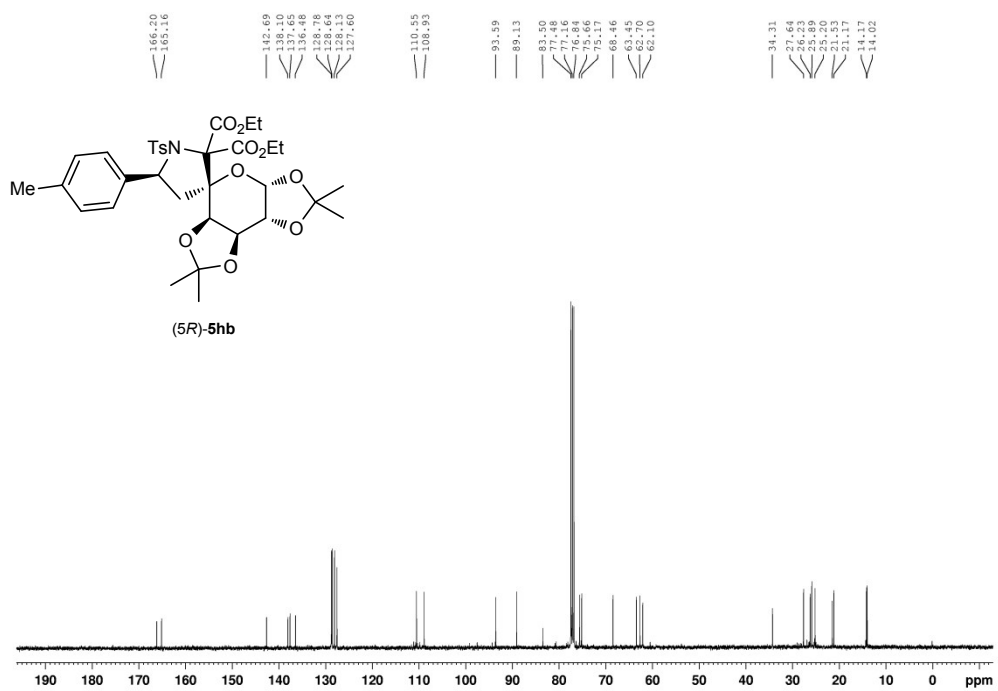

### <sup>1</sup>H-NMR (400 MHz, CDCl<sub>3</sub>) spectra of compound (5S)-5hb

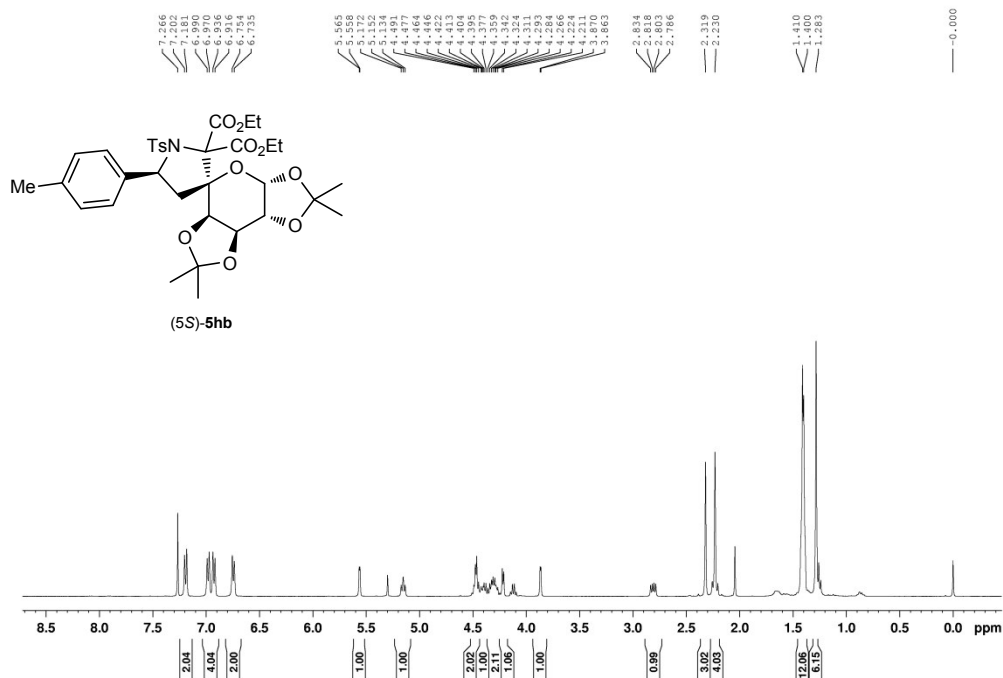

### <sup>13</sup>C-NMR (100 MHz, CDCl<sub>3</sub>) spectra of compound (5S)-5hb

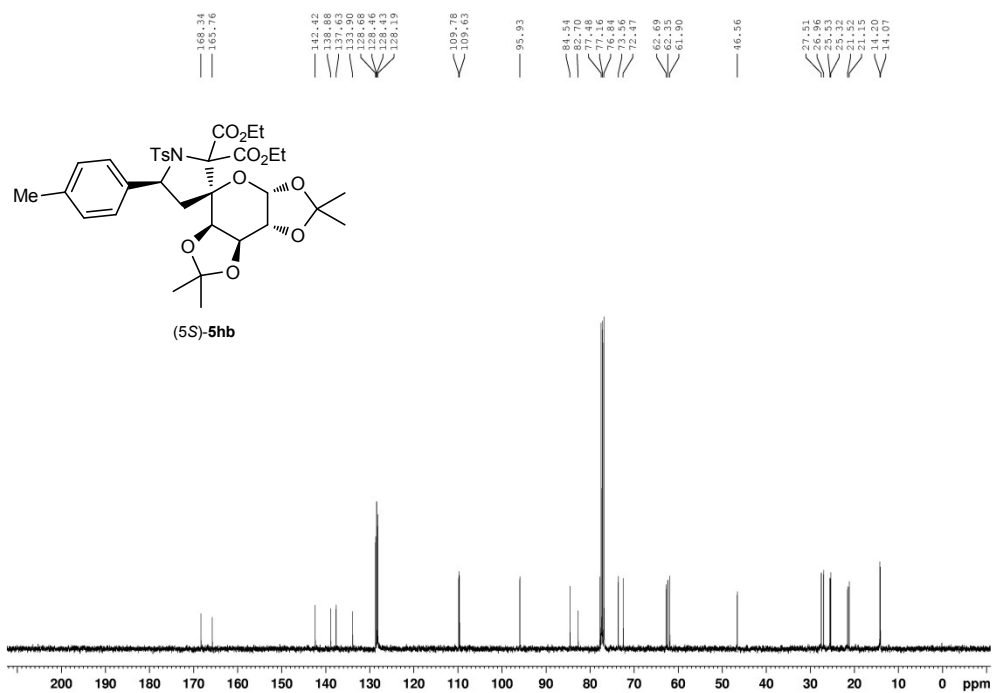



**<sup>1</sup>H-NMR (400 MHz, CDCl<sub>3</sub>) spectra of compound (8*S*)-3hc**

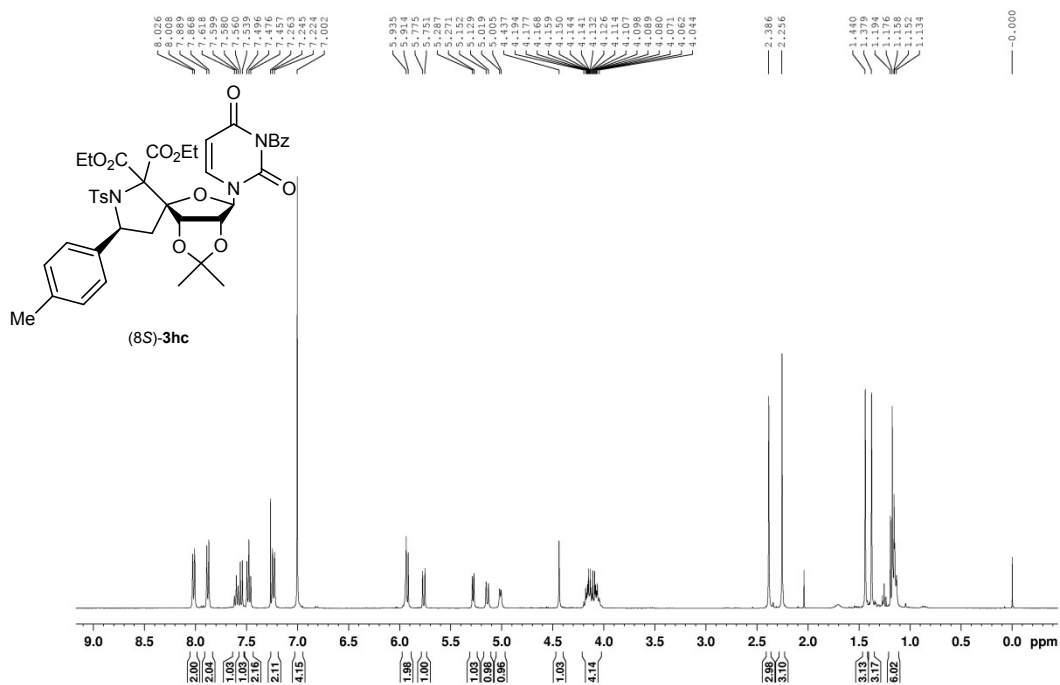

**<sup>13</sup>C-NMR (100 MHz, CDCl<sub>3</sub>) spectra of compound (8*S*)-3hc**

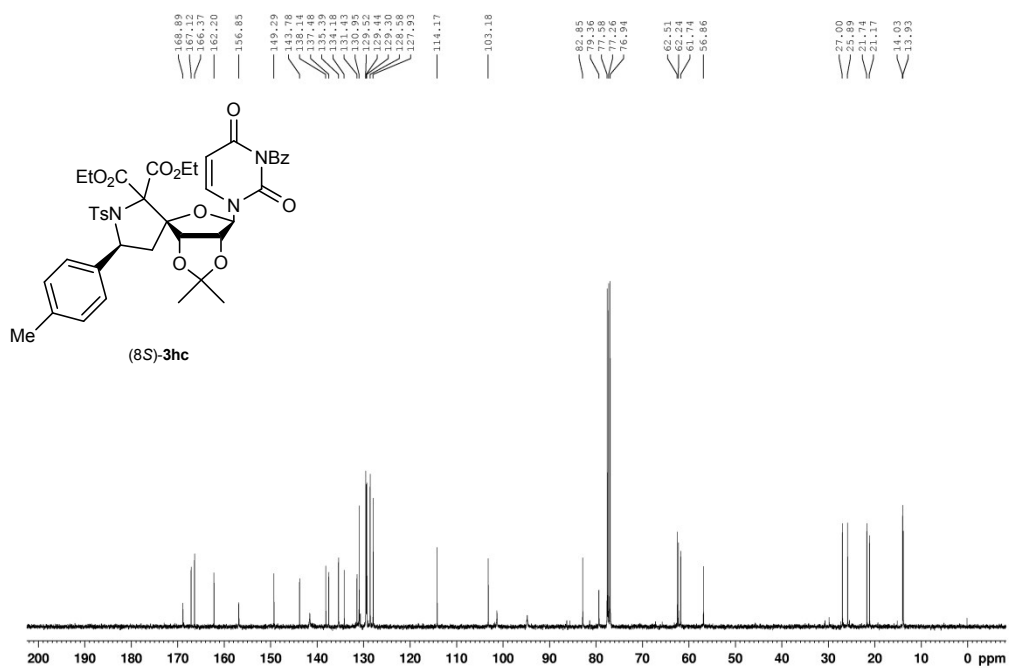

### <sup>1</sup>H-NMR (400 MHz, CDCl<sub>3</sub>) spectra of compound 4

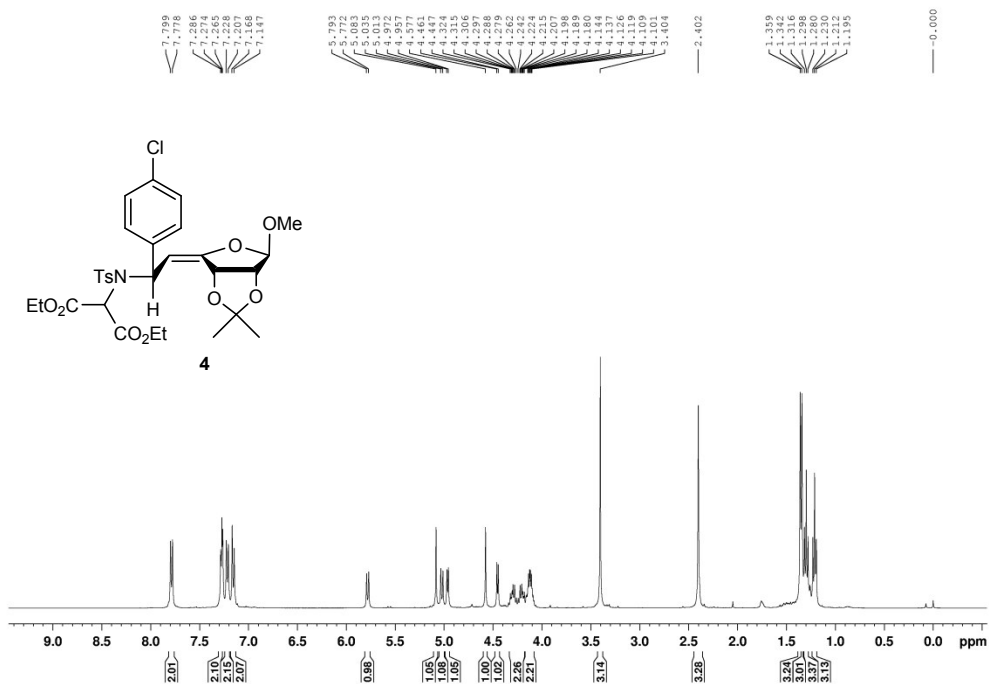

### <sup>13</sup>C-NMR (100 MHz, CDCl<sub>3</sub>) spectra of compound 4

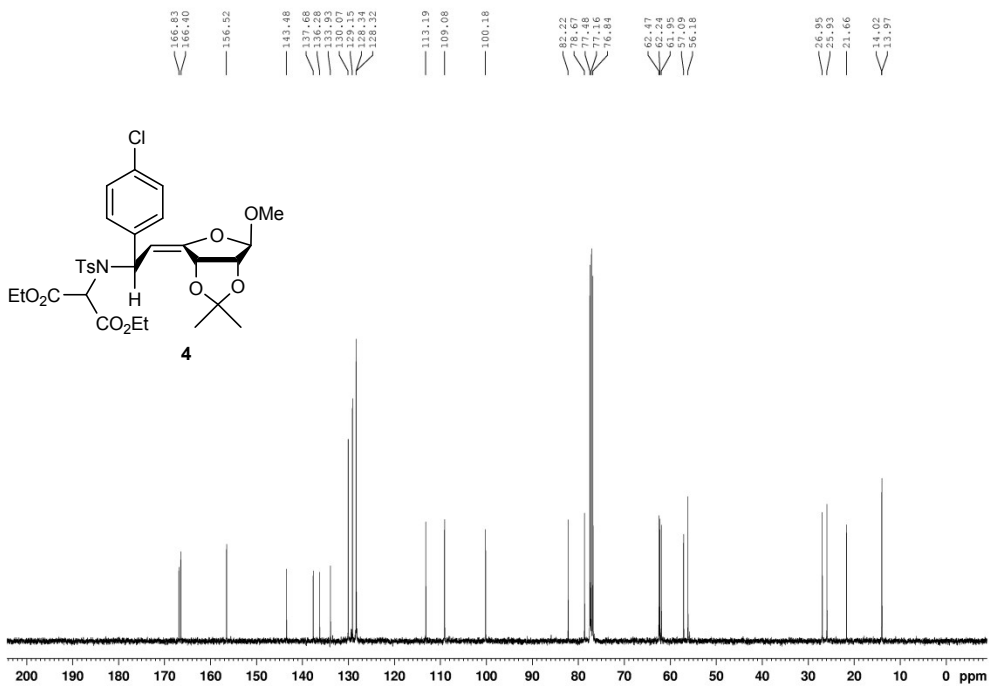

### <sup>1</sup>H-NMR (400 MHz, CDCl<sub>3</sub>) spectra of compound 6

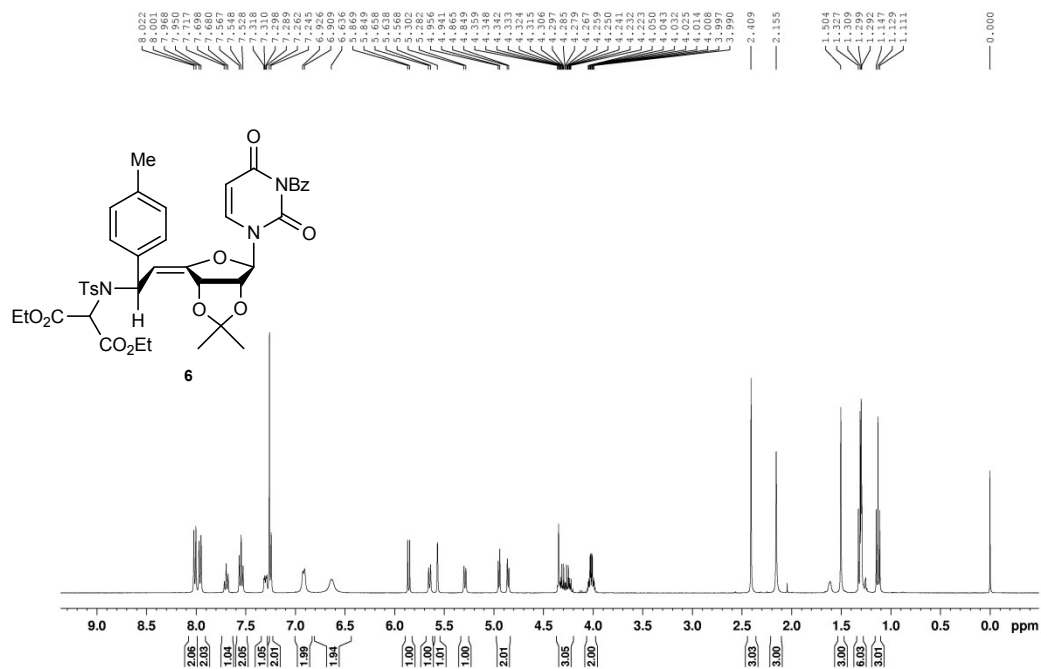

### <sup>13</sup>C-NMR (100 MHz, CDCl<sub>3</sub>) spectra of compound 6

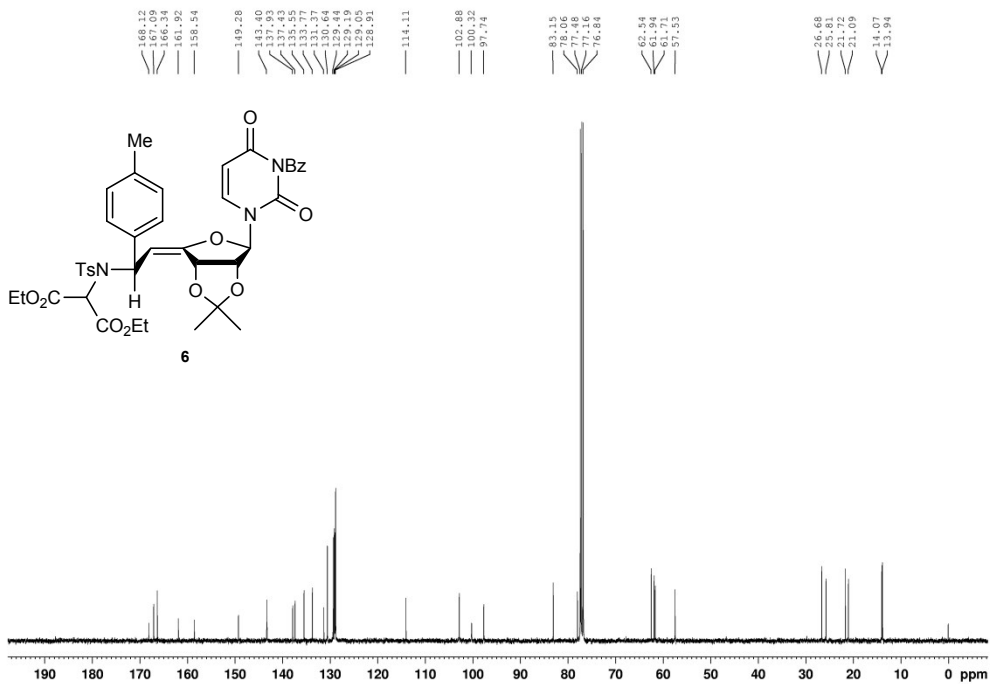



**<sup>1</sup>H-NMR (400 MHz, CDCl<sub>3</sub>) spectra of compound 7**

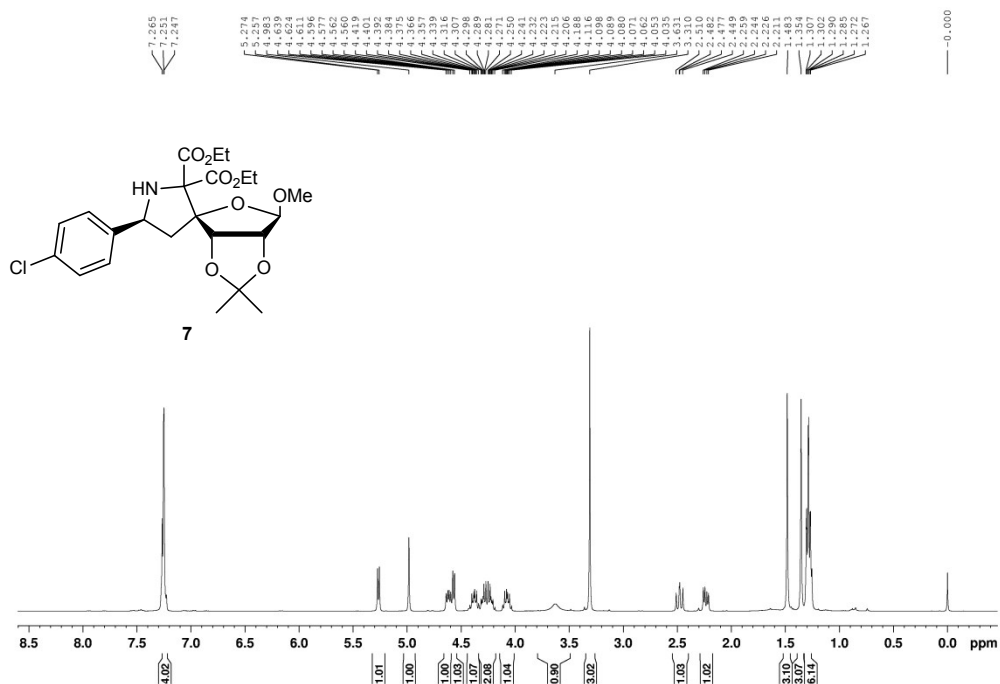

**<sup>13</sup>C-NMR (100 MHz, CDCl<sub>3</sub>) spectra of compound 7**

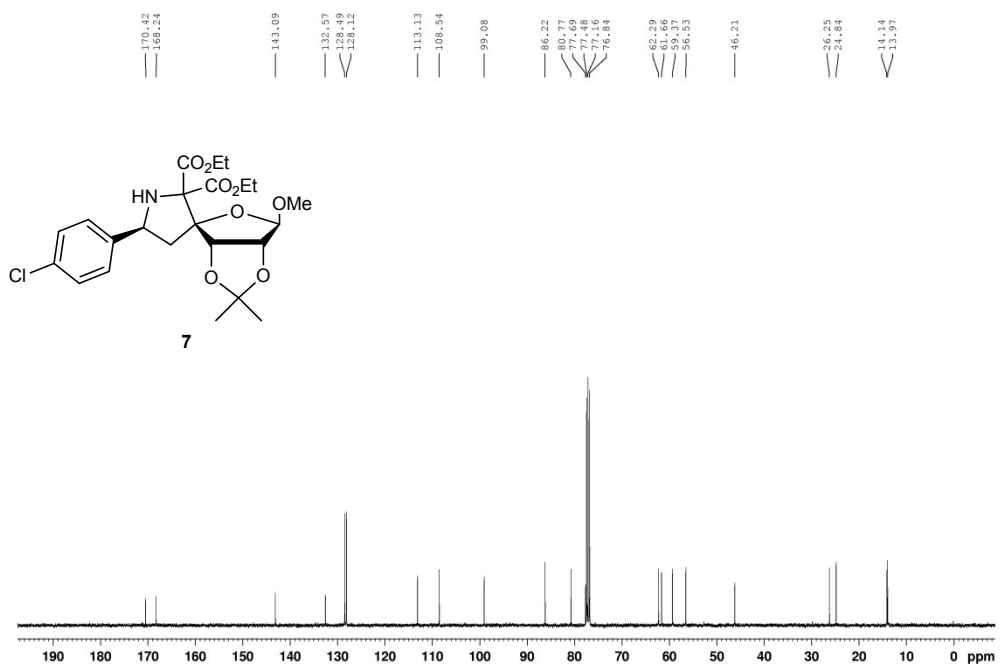

### <sup>1</sup>H-NMR (400 MHz, CDCl<sub>3</sub>) spectra of compound 8

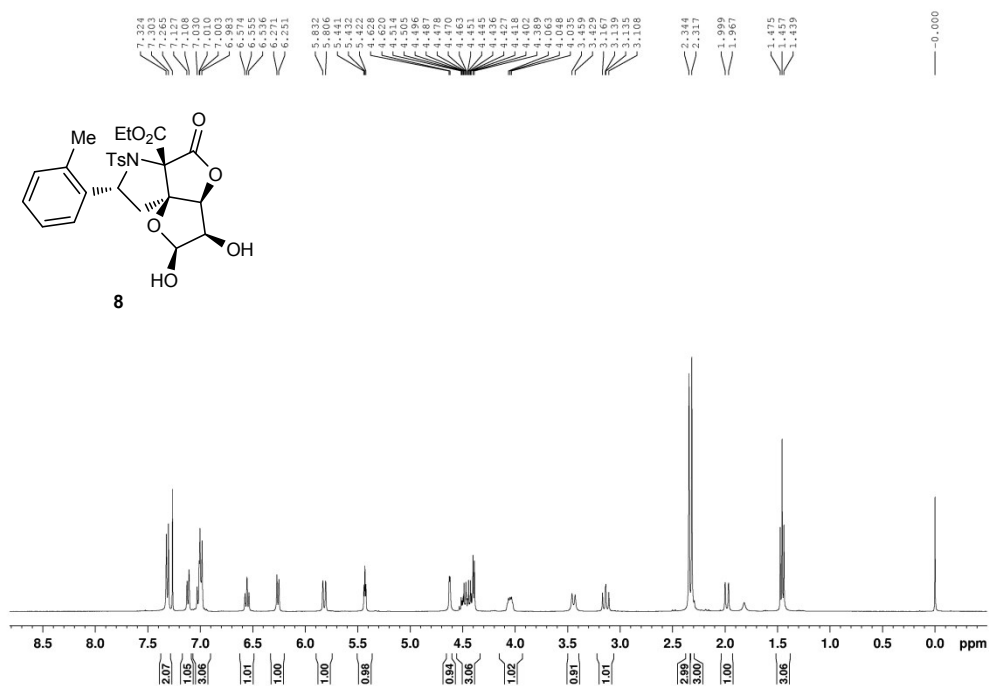

### <sup>13</sup>C-NMR (100 MHz, CDCl<sub>3</sub>) spectra of compound 8

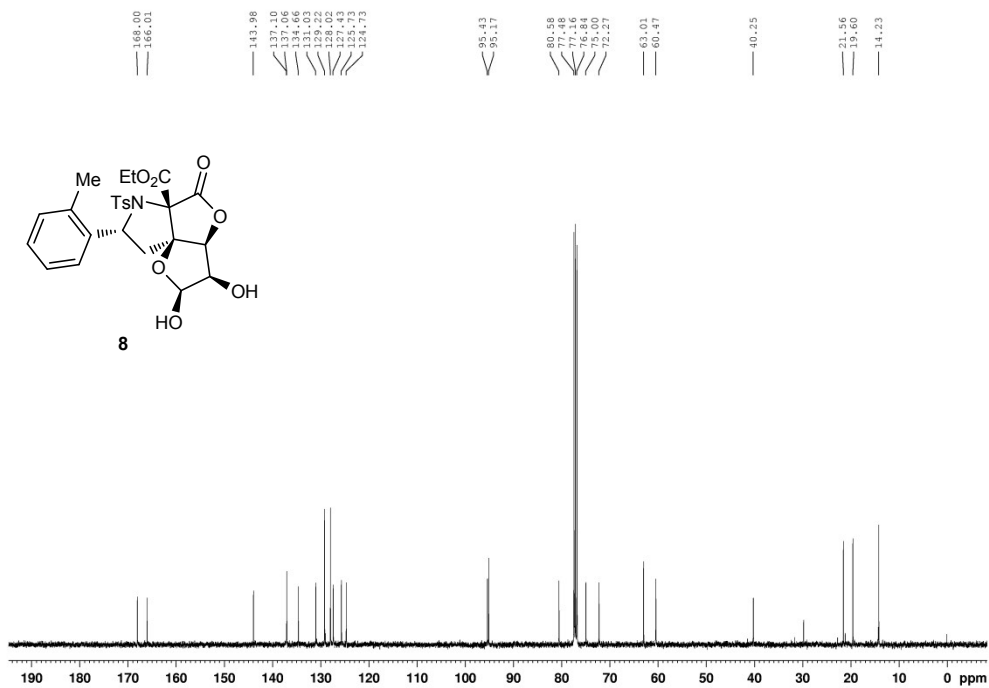

Supplement: d1qo00228g1.pdf [file d1qo00228g1.pdf]
